# Supplementary material for: Determinants of antenatal care use in nine sub-Saharan African countries: a statistical analysis of cross-sectional data from Demographic and Health Surveys
Source: PubMed Central journal article supplement — BMJ Open. 2022 Feb 11;12(2):e051675. doi: 10.1136/bmjopen-2021-051675 (PMC8845176; doi:10.1136/bmjopen-2021-051675), 2022-02-11
Supplement: bmjopen-2021-051675.draft_revisions.pdf [file bmjopen-2021-051675.draft_revisions.pdf]

# BMJ Open

BMJ Open is committed to open peer review. As part of this commitment we make the peer review history of every article we publish publicly available.

When an article is published we post the peer reviewers' comments and the authors' responses online. We also post the versions of the paper that were used during peer review. These are the versions that the peer review comments apply to.

The versions of the paper that follow are the versions that were submitted during the peer review process. They are not the versions of record or the final published versions. They should not be cited or distributed as the published version of this manuscript.

BMJ Open is an open access journal and the full, final, typeset and author-corrected version of record of the manuscript is available on our site with no access controls, subscription charges or pay-per-view fees (<http://bmjopen.bmj.com>).

If you have any questions on BMJ Open's open peer review process please email [info.bmjopen@bmj.com](mailto:info.bmjopen@bmj.com)

# BMJ Open

## Determinants of Antenatal care use in nine sub-Saharan African countries: Evidence from population Demographic and Health Surveys

|                               |                                                                                                                                                                                                                                                                                                                                                                                                                                                                                                                                   |
|-------------------------------|-----------------------------------------------------------------------------------------------------------------------------------------------------------------------------------------------------------------------------------------------------------------------------------------------------------------------------------------------------------------------------------------------------------------------------------------------------------------------------------------------------------------------------------|
| Journal:                      | <i>BMJ Open</i>                                                                                                                                                                                                                                                                                                                                                                                                                                                                                                                   |
| Manuscript ID                 | bmjopen-2021-051675                                                                                                                                                                                                                                                                                                                                                                                                                                                                                                               |
| Article Type:                 | Original research                                                                                                                                                                                                                                                                                                                                                                                                                                                                                                                 |
| Date Submitted by the Author: | 29-Mar-2021                                                                                                                                                                                                                                                                                                                                                                                                                                                                                                                       |
| Complete List of Authors:     | Andegiorgish, Amanuel; Xi'an Jiaotong University School of Medicine, Epidemiology & Biostatistics; Asmara College of Health Sciences, Epidemiology & Biostatistics<br>ELHOUMED, Mohamed; Xi'an Jiaotong University, Department of Epidemiology and Biostatistics<br>Qi, Qi; Xi'an Jiaotong University, Department of Epidemiology and Biostatistics<br>Zhu, Zhonghai; Xi'an Jiaotong University, Department of Epidemiology and Biostatistics<br>Zeng, L; Xi'an Jiaotong University, Department of Epidemiology and Biostatistics |
| Keywords:                     | Health policy < HEALTH SERVICES ADMINISTRATION & MANAGEMENT, Community child health < PAEDIATRICS, Prenatal diagnosis < OBSTETRICS, EPIDEMIOLOGY                                                                                                                                                                                                                                                                                                                                                                                  |
|                               |                                                                                                                                                                                                                                                                                                                                                                                                                                                                                                                                   |

SCHOLARONE™  
Manuscripts

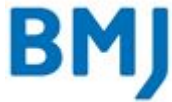

I, the Submitting Author has the right to grant and does grant on behalf of all authors of the Work (as defined in the below author licence), an exclusive licence and/or a non-exclusive licence for contributions from authors who are: i) UK Crown employees; ii) where BMJ has agreed a CC-BY licence shall apply, and/or iii) in accordance with the terms applicable for US Federal Government officers or employees acting as part of their official duties; on a worldwide, perpetual, irrevocable, royalty-free basis to BMJ Publishing Group Ltd ("BMJ") its licensees and where the relevant Journal is co-owned by BMJ to the co-owners of the Journal, to publish the Work in this journal and any other BMJ products and to exploit all rights, as set out in our [licence](#).

The Submitting Author accepts and understands that any supply made under these terms is made by BMJ to the Submitting Author unless you are acting as an employee on behalf of your employer or a postgraduate student of an affiliated institution which is paying any applicable article publishing charge ("APC") for Open Access articles. Where the Submitting Author wishes to make the Work available on an Open Access basis (and intends to pay the relevant APC), the terms of reuse of such Open Access shall be governed by a Creative Commons licence – details of these licences and which [Creative Commons](#) licence will apply to this Work are set out in our licence referred to above.

Other than as permitted in any relevant BMJ Author's Self Archiving Policies, I confirm this Work has not been accepted for publication elsewhere, is not being considered for publication elsewhere and does not duplicate material already published. I confirm all authors consent to publication of this Work and authorise the granting of this licence.

1  
2  
3  
4 **Determinants of Antenatal care use in nine sub-Saharan African countries:**  
5 **Evidence from population Demographic and Health Surveys**  
6

7 **Amanuel kidane Andegiorgish<sup>1,2</sup>, Mohamed Elhoumed<sup>1,3</sup>, Qi Qi<sup>1</sup>, Zhonghai**

8 **Zhu<sup>1</sup> and Lingxia Zeng<sup>1</sup> \***  
9

10  
11  
12 <sup>1</sup> Department of Epidemiology and Biostatistics, School of Public Health, Xi'an  
13 Jiaotong University Health Science Center, No 76 West Yanta Road, Xi'an  
14  
15 710061, Shaanxi Province, People's Republic of China  
16

17  
18  
19 <sup>2</sup> Department of Epidemiology and Biostatistics, Asmara College of Health  
20 Sciences, School of Public Health, P.O.Box 8566, Asmara, Eritrea  
21

22  
23  
24 <sup>3</sup> National Institute of Public Health Research (INRSP), BP. 695, Nouakchott,  
25 Mauritania  
26

27  
28  
29 \* Correspondence: Lingxia Zeng; tjzlx@mail.xjtu.edu.cn  
30

31  
32 **Abstract:**  
33

34  
35 **Objective:** To examine the factors associated with four or more antenatal care  
36 attendance in nine sub-Saharan African countries.  
37

38  
39 **Participants:** 56002 women who had given birth three years prior to the survey.  
40

41  
42 **Methods.** Data sets were drawn from the most recent Demographic health surveys  
43 (DHS) of women 15-49-year-old questionnaire. Chi-square tests, Univariate, and  
44 multivariable logistic regression models were performed to explore the associated  
45 factors.  
46  
47

48  
49  
50 **Outcomes:** Four or more antenatal visits  
51

52  
53 **Results:** Only 55.52% (95% CI; 55.11 to 55.93) of all women had four or more  
54 antenatal care visits. Multivariable analysis shows that all sociodemographic  
55 variables were significantly associated with four or more antenatal care visits  
56 (p<0.001). Four or more antenatal care visits vary widely across the studied  
57  
58  
59  
60

1  
2  
3 countries. The highest visits were in Ghana (85.6%) and Namibia (78.9%), and the  
4  
5 lowest was in Rwanda (44.5%) and Senegal (45.3%). In country-specific analysis,  
6  
7 the odds of lower uptake of four or more antenatal care attendance was significant  
8  
9 among women from a rural residence in Kenya, Malawi, and Senegal: no schooling  
10  
11 in Kenya, Malawi, Rwanda, and Zambia; un-employed in Ghana and Uganda;  
12  
13 poorest households in Ghana, Kenya, Malawi, Senegal, Tanzania and Uganda; and  
14  
15 lack of access to media in all the studied countries except in Malawi, Rwanda,  
16  
17 Senegal, and Zambia. Overall, women from low socioeconomic status (rural place of  
18  
19 residence, no schooling, unemployed, poor household, and no media access) were  
20  
21 less likely to uptake the required antenatal care visits.  
22  
23  
24  
25

26 **Conclusion:** The overall antenatal care visits is not adequate, with substantial  
27  
28 variation among the studied countries. Program priority for women of low economic  
29  
30 status and poor social development on antenatal care must be implemented.  
31  
32 Integrated interventions addressing multiple factors and the whole region is needed.  
33  
34

35  
36 **Keywords:** Four or more antenatal care, Determinants, sub-Saharan Africa,  
37  
38 Demographic health survey, and health service utilization.  
39  
40

#### 41 **Strengths and limitations of this study**

- 42  
43 ➤ To the best of our knowledge, no prior study has analyzed the determinants of  
44  
45 antenatal care use in segregated and pooled data forms in a single study
- 46  
47 ➤ The study used national representative samples from nine sub-Saharan Africa  
48  
49 countries which have been linked to enhance the generatability of the study
- 50  
51 ➤ This analysis included women who have birth three years before the survey,  
52  
53 which could minimize the recall bias of self-report at a single point in time
- 54  
55 ➤ The survey was cross-sectional design. Therefore, it cannot affirm any causal  
56  
57 inference or direction of the association.
- 58  
59 ➤ Since the data sets were obtained from countries DHS in a different time,  
60  
awareness of participants may be varied due to time heterogeneity

## Introduction

Maternal and neonatal mortality which remains unacceptably high is a significant public health issues that reflect the overall status of a country's healthcare system and socioeconomic development<sup>1</sup>. The world health organization (WHO) estimates that approximately 830 maternal deaths/day from preventable causes relate to pregnancy and childbirth, and 99% of these deaths occur in low-income countries<sup>2</sup>. Sub-Saharan Africa (SSA) remains the region with the highest maternal and under-five mortality<sup>3-5</sup>. Almost half of the under-five deaths occur among new-born babies whose deaths could be prevented by reaching a high coverage of quality antenatal care, skilled care at birth, postnatal care for mother and baby, and care of small and sick new-born<sup>3 4</sup>. Several review studies on intervention for maternal and new-born life have demonstrated that the provision of adequate antenatal care (ANC) brings with it a positive impact on pregnancy outcomes through early diagnosis and appropriate management and this has a 39% reduced risk of neonatal mortality in sub-Saharan countries<sup>6-9</sup>.

On top of the WHO advise every pregnant woman with a normal pregnancy in middle-and low-income countries to attend at least four ANC's<sup>1</sup>, several studies have attempted to identify factors associated with the underutilization of ANC's<sup>10 11</sup>. Age<sup>11-15</sup>, women's education<sup>8 11-23</sup>, husbands' education<sup>17 21 22</sup>, socioeconomic status<sup>13-22 24</sup>, women's employment<sup>17</sup>, birth order<sup>10 11 17</sup>, frequency of listening to the radio/watching TV/reading newspaper/ magazines<sup>8 10 17 22 23</sup>, and place of residence<sup>11 12 15-18 21 23 24</sup> are among the factors associated with underutilization of ANC. Many studies have concluded that the factors attributed to inadequate ANC follow-ups are quite substantial across regions and countries<sup>10 15 22 25 26</sup>.

Meeting SDGs to ensure healthy lives and well-being for all ages by 2030 requires transnational organizations' efforts and the ability to collaborate in

1  
2  
3 partnership. Interestingly the means of implementing and revitalizing capacity  
4 development and the information exchange of multinational cooperation have been  
5 emphasized in the SDGs <sup>27</sup>. However, despite the available evidence on ANC's key  
6 role in reducing maternal and neonatal mortality, millions of women in developing  
7 countries do not receive it and there remains a high variability (32%-91%) of four or  
8 more ANC (4<sup>+</sup>ANC ) visits between countries <sup>20 21 23 28</sup>. Lessons on coverage of  
9 crucial ANCs from neighboring areas would aid in precise allocations of resources  
10 and interventions where they are most needed. Therefore, new research projects on  
11 mutual benefit and knowledge sharing at every level must be implemented to attain  
12 global health development goals.  
13  
14  
15  
16  
17  
18  
19  
20  
21  
22  
23  
24

25  
26 We conducted secondary data analysis using recent standard population and  
27 Demographic Health Surveys conducted in nine sub-Saharan Africa countries (Ghana,  
28 Kenya, Malawi, Namibia, Senegal, Rwanda, Tanzania, Uganda, and Zambia). The  
29 objective of the study was to understand the factors associated with 4<sup>+</sup>ANC  
30 attendance.  
31  
32  
33  
34  
35  
36  
37  
38

## 39 **Materials and Methods**

### 40 **Study design**

41  
42 We used data from the Demographic and Health Survey (DHS). DHS is a  
43 five-year periodic national representative cross-sectional study using a stratified  
44 two-stage cluster sampling design. Details of the DHS protocol are published  
45 elsewhere <sup>29</sup> [[http:// www.dhsprogram.com/data/data-collection.cfm](http://www.dhsprogram.com/data/data-collection.cfm)]. Information  
46 from ever-married women aged 15-49 years in nine sub-Sahara Africa countries on  
47 demographic characteristics and reproductive history were collected (Figure-1).  
48  
49  
50  
51  
52  
53  
54  
55  
56  
57  
58  
59  
60

### **Participants**

1  
2  
3 Women who had one or more births three years before the survey were included  
4  
5 as study participants. Selection of study participants was as shown in (Figure-2)  
6  
7

### 8 **Outcome variables**

9  
10 Our study's primary outcome was dichotomized as 4+ANC visits (yes/no). We  
11  
12 calculated minimum of 4+ANC visits during their last pregnancy. ANC is defined as  
13  
14 a health care service provided to mother and fetus during pregnancy by skilled health  
15  
16 personnel. ANC provided by non-health professionals such as traditional birth  
17  
18 attendants were excluded.  
19  
20  
21

### 22 **Explanatory variables**

23  
24 A set of sociodemographic variables related to the utilization of ANC such as  
25  
26 women's age in years, women and husbands education and occupation, birth order  
27  
28 (parity), frequency of listening to radio/ watching TV/ reading magazines, household  
29  
30 wealth quantile, and place of residence were identified from the survey data as  
31  
32 predictors of ANC follow-ups. Numerical values like age, ANC visits, and years of  
33  
34 education attended were grouped into categories. Women's age in years was  
35  
36 tabulated into groups (15-19-year, 20-24-year, 25-29-year, 30-34 year, 35 and above),  
37  
38 women's and husbands' education were classified as 'no schooling', 'primary',  
39  
40 'secondary', and 'higher' education. Women's and husband's occupation were  
41  
42 classified as 'not working outside home', 'professional/skilled work', 'agriculture',  
43  
44 and 'unskilled'. Frequency of listening to radio/ watching TV/ reading magazines (not  
45  
46 at all, less than once a week, and at least once a week) was included to gauge the  
47  
48 women's exposure to promotion messages on the benefits of ANC attendance. The  
49  
50 household wealth index was constructed using a principal component analysis method  
51  
52 from items related to possession of durable assets, access to utilities and  
53  
54 infrastructure, and housing characteristics to assess the mothers' economic status.  
55  
56  
57  
58  
59  
60



1  
2  
3 Each woman was ranked into five categories (poorest, poorer, middle, richer, and  
4 richest) based on a household asset score, comprising 20% of the population<sup>10 30</sup>.  
5  
6 Place of residence/ ecological status assessed the difference in the availability and  
7  
8 accessibility of services among urban and rural and were identified from the survey  
9  
10 data as predictors of ANC follow-ups. Data sets were segregated according to the nine  
11  
12 countries in the SSA region. There is merit in segregating data, for it allows us to  
13  
14 focus on aspects of ANC visits that may remain hidden in intra-national/national level  
15  
16 indicators.  
17  
18  
19  
20  
21

### 22 **Data sources/ measurements**

23  
24  
25 Data sets were collected through household interviews using a structured  
26  
27 questionnaire. Women were interviewed about the number of ANC visits. Trained  
28  
29 interviewers obtained informed consent from all eligible households and women  
30  
31 before conducting the interview using pencil and paper questionnaires. The surveys  
32  
33 are weighted for over or under-sampling and non-response. Thus, the design and  
34  
35 standardized core modules allow for regional and transnational comparison of the  
36  
37 data. Field supervisors and data clerks checked all forms before entering them into  
38  
39 databases. Data for this analysis was taken from the latest household survey of the  
40  
41 studied countries. This study's survey years ranged from 2013 to 2018, and the sample  
42  
43 size ranges from 2,286 in Namibia to 10,981 in Kenya.  
44  
45  
46  
47

48 Multiple responses for ANC visits were addressed by limiting the study looking  
49  
50 at the service given to a woman by qualified health care professionals during their  
51  
52 most recent pregnancy preceding the study period.  
53  
54  
55

### 56 **Data analysis**

57  
58  
59 Data analysis was performed using STATA software version 14.0. Descriptive  
60  
analysis was conducted on combined and separate forms for the studied country.

1  
2  
3 Chi-square tests were used to analyze the potential factors affecting ANC use during  
4 their last pregnancy. Bivariate and multivariable regressions were used to study the  
5 statistical association between the explanatory variables and 4+ANC. A multilevel  
6 analysis was used in which the level of coefficients was modeled as a function of  
7 predictors considering the average log odds of 4+ ANC across the studied countries.  
8 Women's age at childbirth and husband's occupation were excluded from the  
9 multilevel analysis due to collinearity effects with a variance inflation factor value  
10 (VIF>4) on the collinearity diagnosis test. A two-sided P-value <0.05 was considered  
11 statistically significant in this study.  
12  
13  
14  
15  
16  
17  
18  
19  
20  
21  
22

### 23 **Patient and public involvement**

24 The study used public available secondary data from DHS( <https://dhsprogram.com/>).  
25  
26 Patients and public were not involved in the design and conducted of this research  
27  
28  
29  
30

## 31 **Results**

### 32 **Baseline characteristics of the study population**

33 Overall, 56,002 women with complete details from nine SSA countries were  
34 included in this study (Table1-supplementary). The distribution of study participants  
35 was presented in flowchart Figure 2. Data for late 2013-2018 show that 55.52% (95%  
36 CI; 55.11 to 55.93) of the women in the nine SSA countries had at least four ANC  
37 visits with a skilled provider during pregnancy. Thirty-five percent of the participated  
38 women started their first ANC visit in the 1<sup>st</sup> trimester and 57% in the 2<sup>nd</sup> trimester of  
39 pregnancy. Before pregnancy, 82.2% of women in this study had received a tetanus  
40 injection. There were 1,808 (3.23%) new-born deaths from all births in the three years  
41 preceding the survey.  
42  
43  
44  
45  
46  
47  
48  
49  
50  
51  
52  
53  
54

55 The highest proportion of 4+ANC visits among the studied countries was from  
56 Ghana (85.61%) followed by Namibia (78.92%), and the lowest proportion was from  
57  
58  
59  
60

1  
2  
3 Rwanda, Senegal, and Tanzania, in which the proportion of 4+ANC attendance was  
4  
5 below 50% (Figure 3).  
6

7  
8 Pooled data (Figure 4) indicated that the highest proportion of 4+ ANC visits was  
9  
10 among mothers aged 25-29 (57.3%). Mothers from an urban place of residence  
11  
12 account for 64.3% of 4+ ANC visits. A similar higher proportion of ANC visits was  
13  
14 reported among mothers and husbands with higher education, among the richest  
15  
16 families, primigravidae, and women with access to media.  
17  
18

### 19 20 **Determinants of four or more antenatal care visits** 21

22  
23 Women aged 25-29 years attended more ANC than all the other age groups  
24  
25 across all the studied countries except in Zambia ( $p=0.361$ ), and the difference was  
26  
27 statistically significant ( $p<0.005$ ). Similarly, women from an urban place of residence  
28  
29 have meaningful higher ANC visits than women from a rural area of living, and the  
30  
31 difference was significant ( $p<0.001$ ) except in Rwanda ( $p=0.788$ ). Table 2 shows that  
32  
33 as women's and husbands' education level increased, women utilization of ANC  
34  
35 increased across all nine countries in the regions ( $p<0.001$ ). The highest ANC  
36  
37 attendance was among women and husband highest educational levels from Ghana,  
38  
39 99.2% and 96.4% respectively, and the lowest was among women of no schooling in  
40  
41 Rwanda (37.6%) and Tanzania (38.6%), and husband's no schooling in Tanzania  
42  
43 (36.3%).  
44  
45  
46  
47

48 Both women and husband occupations were associated ( $p<0.001$ ) with women's  
49  
50 ANC attendance across all regions except in Rwanda ( $p=0.493$ ) and Zambia  
51  
52 ( $p=0.062$ ) where husband's occupation is not significantly associated with women  
53  
54 4+ANC visits. Husband's employment in Rwanda has a negative relationship with  
55  
56 women 4+ANC visits.  
57  
58

59 In this study, difference in household wealth status has a significant positive  
60  
association ( $p<0.001$ ) with 4+ANC visits in all the studied countries except in

1  
2  
3 Rwanda ( $p=0.234$ ). Women's birth order is associated with 4+ANC visits, except in  
4  
5 Malawi. The frequency of women's listening to radio/ watching TV/ reading  
6  
7 newspapers or magazine is related to 4+ANC attendance in the studied countries,  
8  
9 except in Rwanda and Zambia ( $p>0.05$ ).  
10  
11  
12  
13  
14  
15  
16  
17  
18  
19  
20  
21  
22  
23  
24  
25  
26  
27  
28  
29  
30  
31  
32  
33  
34  
35  
36  
37  
38  
39  
40  
41  
42  
43  
44  
45  
46  
47  
48  
49  
50  
51  
52  
53  
54  
55  
56  
57  
58  
59  
60

For peer review only

**Table 2. Sociodemographic characteristics influencing 4+ ANC visits in nine sub-Saharan countries.**

| Variables           | Ghana (3,224) | Kenya (10,981) | Malawi (9,541) | Namibia (2,286) | Rwanda (4,416) | Senegal     |                  |                |                |  |
|---------------------|---------------|----------------|----------------|-----------------|----------------|-------------|------------------|----------------|----------------|--|
|                     |               |                |                |                 |                | (6,552)     | Tanzania (5,536) | Uganda (7,979) | Zambia (5,487) |  |
| Age group           |               |                |                |                 |                |             |                  |                |                |  |
| 15-19               | 140(79.1)     | 399(47.11)     | 470(43.93)     | 153(66.81)      | 59(40.14)      | 232(40.00)  | 252(47.10)       | 475(58.93)     | 430(62.05)     |  |
| 20-24               | 519(84.12)    | 1547(54.05)    | 1461(48.62)    | 487(78.30)      | 427(45.77)     | 743(47.08)  | 718(49.42)       | 1466(62.30)    | 989(65.63)     |  |
| 25-29               | 722(87.73)    | 1782(55.02)    | 1115(52.01)    | 463(81.66)      | 597(47.76)     | 791(46.67)  | 659(50.89)       | 1213(62.78)    | 779(63.70)     |  |
| 30-34               | 636(86.53)    | 1080(52.81)    | 902(52.78)     | 334(82.47)      | 483(43.59)     | 595(46.09)  | 491(48.76)       | 924(61.52)     | 656(65.74)     |  |
| 35 and above        | 743(85.21)    | 982(49.40)     | 840(52.08)     | 367(79.27)      | 399(40.80)     | 609(43.25)  | 544(43.66)       | 753(54.33)     | 668(62.90)     |  |
| p-value             | 0.029         | < 0.001        | < 0.001        | < 0.001         | 0.012          | 0.014       | 0.004            | < 0.001        | 0.361          |  |
| Place of residence  |               |                |                |                 |                |             |                  |                |                |  |
| Urban               | 1207(91.72)   | 2228(61.28)    | 892(57.92)     | 853(82.66)      | 442(44.87)     | 1188(60.00) | 816(60.53)       | 1009(67.90)    | 1028(60.44)    |  |
| Rural               | 1553(81.39)   | 3562(48.50)    | 3896(48.69)    | 951(75.84)      | 1523(44.39)    | 1782(38.98) | 1848(44.13)      | 3822(58.86)    | 2494(65.87)    |  |
| p-value             | < 0.001       | < 0.001        | < 0.001        | < 0.001         | 0.788          | < 0.001     | < 0.001          | < 0.001        | < 0.001        |  |
| Mother's education  |               |                |                |                 |                |             |                  |                |                |  |
| No schooling        | 846(79.21)    | 916(40.75)     | 494(45.78)     | 106(58.56)      | 228(37.62)     | 1982(41.28) | 421(38.62)       | 535(55.15)     | 325(59.52)     |  |
| Primary             | 544(82.42)    | 2884(50.67)    | 3124(49.15)    | 367(71.40)      | 1397(44.53)    | 677(54.51)  | 1557(46.91)      | 2872(58.18)    | 1807(64.15)    |  |
| Secondary           | 1242(90.86)   | 1380(60.50)    | 1038(53.73)    | 1229(82.82)     | 257(45.73)     | 291(60.00)  | 643(59.76)       | 1072(66.46)    | 1206(63.37)    |  |
| Higher              | 128(99.22)    | 610(80.26)     | 132(75.86)     | 102(95.33)      | 83(74.77)      | 20(83.33)   | 43(84.31)        | 352(76.52)     | 184(83.26)     |  |
| p-value             | < 0.001       | < 0.001        | < 0.001        | < 0.001         | < 0.001        | < 0.001     | < 0.001          | < 0.001        | < 0.001        |  |
| Husband's education |               |                |                |                 |                |             |                  |                |                |  |
| No schooling        | 699(79.16)    | 344(40.23)     | 348(48.07)     | 123(65.78)      | 248(40.52)     | 1900(40.85) | 234(36.34)       | 324(58.70)     | 161(61.92)     |  |
| Primary             | 292(83.67)    | 1172(51.38)    | 2068(48.72)    | 174(73.73)      | 1267(45.66)    | 362(55.69)  | 1341(45.66)      | 2057(57.54)    | 1008(64.24)    |  |

1  
2  
3  
4  
5  
6  
7  
8  
9  
10  
11  
12  
13  
14  
15  
16  
17  
18  
19  
20  
21  
22  
23  
24  
25  
26  
27  
28  
29  
30  
31  
32  
33  
34  
35  
36  
37  
38  
39  
40  
41  
42  
43  
44  
45  
46

|           |             |            |             |            |            |            |            |             |             |
|-----------|-------------|------------|-------------|------------|------------|------------|------------|-------------|-------------|
| Secondary | 1245(88.61) | 727(60.43) | 1314(52.86) | 522(82.08) | 172(44.33) | 273(62.19) | 521(59.68) | 1114(65.38) | 1174(64.01) |
| Higher    | 267(96.39)  | 347(73.83) | 252(67.56)  | 83(96.51)  | 95(62.91)  | 84(68.29)  | 75(69.44)  | 508(73.62)  | 272(78.61)  |
| p-value   | < 0.001     | < 0.001    | < 0.001     | < 0.001    | < 0.001    | < 0.001    | < 0.001    | < 0.001     | < 0.001     |

## Mother's occupation

|                           |             |             |             |            |             |             |             |             |             |
|---------------------------|-------------|-------------|-------------|------------|-------------|-------------|-------------|-------------|-------------|
| Not working O/H           | 519(81.99)  | 1012(50.40) | 1457(48.47) | 969(74.65) | 130(40.12)  | 1654(45.23) | 543(52.92)  | 760(56.55)  | 1560(61.81) |
| Professional/Skilled work | 1375(91.18) | 305(70.28)  | 579(55.94)  | 558(84.67) | 336(49.19)  | 656(52.27)  | 261(65.91)  | 1468(64.84) | 668(67.61)  |
| Agriculture               | 786(78.52)  | 632(49.11)  | 2031(49.61) | 40(86.96)  | 1428(44.47) | 377(33.87)  | 1247(41.58) | 2099(57.90) | 965(66.69)  |
| Unskilled                 | 73(97.33)   | 859(56.03)  | 721(51.28)  | 233(83.51) | 71(36.04)   | 279(53.55)  | 613(54.98)  | 498(67.30)  | 328(62.36)  |
| p-value                   | < 0.001     | < 0.001     | < 0.001     | < 0.001    | 0.003       | < 0.001     | < 0.001     | < 0.001     | 0.001       |

## Husband's occupation

|                           |             |             |             |            |             |             |             |             |             |
|---------------------------|-------------|-------------|-------------|------------|-------------|-------------|-------------|-------------|-------------|
| Not working O/H           | -           | 44(51.76)   | 380(49.74)  | 8(88.89)   | 12(50.00)   | 82(49.70)   | 16(38.10)   | 134(59.03)  | 267(62.38)  |
| Professional/Skilled work | 1024(92.42) | 777(62.26)  | 1241(53.84) | 459(83.91) | 516(45.03)  | 1412(51.22) | 600(57.58)  | 2091(65.53) | 905(65.72)  |
| Agriculture               | 1065(78.54) | 556(44.91)  | 1446(49.25) | 117(68.02) | 1082(46.16) | 726(34.00)  | 1096(41.66) | 1327(55.36) | 1033(66.09) |
| Unskilled                 | 433(91.54)  | 1199(54.01) | 920(49.78)  | 180(81.45) | 180(42.35)  | 445(48.74)  | 467(54.75)  | 521(62.40)  | 488(61.69)  |
| p-value                   | < 0.001     | 0.006       | < 0.001     | < 0.001    | 0.493       | < 0.001     | < 0.001     | < 0.001     | 0.062       |

## Wealth quintile

|         |            |             |             |            |            |            |            |             |             |
|---------|------------|-------------|-------------|------------|------------|------------|------------|-------------|-------------|
| Poorest | 817(78.78) | 1532(41.79) | 1002(46.32) | 369(73.51) | 444(41.73) | 634(31.51) | 457(37.71) | 1152(54.78) | 1003(65.13) |
| Poorer  | 577(81.96) | 1130(49.71) | 1022(48.83) | 351(74.05) | 409(45.14) | 706(40.88) | 450(40.50) | 1020(58.42) | 842(66.09)  |
| Middle  | 495(86.09) | 1011(55.10) | 888(48.05)  | 388(79.51) | 377(46.60) | 660(49.14) | 481(44.87) | 893(60.13)  | 692(62.62)  |
| Richer  | 474(94.23) | 1007(60.55) | 887(50.63)  | 401(82.51) | 355(45.87) | 561(61.58) | 666(55.64) | 863(64.26)  | 473(57.47)  |
| Richest | 397(98.02) | 1110(71.15) | 989(58.69)  | 295(87.80) | 380(44.03) | 409(73.17) | 610(64.62) | 903(69.35)  | 512(68.72)  |
| p-value | < 0.001    | < 0.001     | < 0.001     | < 0.001    | 0.234      | < 0.001    | < 0.001    | < 0.001     | < 0.001     |

## Birth order

1  
2  
3  
4  
5  
6  
7  
8  
9  
10  
11  
12  
13  
14  
15  
16  
17  
18  
19  
20  
21  
22  
23  
24  
25  
26  
27  
28  
29  
30  
31  
32  
33  
34  
35  
36  
37  
38  
39  
40  
41  
42  
43  
44  
45  
46

|                                                                             |             |             |             |             |             |             |             |             |             |
|-----------------------------------------------------------------------------|-------------|-------------|-------------|-------------|-------------|-------------|-------------|-------------|-------------|
| First                                                                       | 636(87.60)  | 1471(59.80) | 1267(51.23) | 594(79.41)  | 613(50.16)  | 718(52.33)  | 766(56.70)  | 1077(63.73) | 918(65.95)  |
| Second                                                                      | 584(89.30)  | 1345(57.45) | 941(48.26)  | 469(81.42)  | 502(46.83)  | 585(50.39)  | 538(51.88)  | 953(63.87)  | 684(65.14)  |
| Third                                                                       | 470(85.77)  | 1019(54.40) | 798(50.41)  | 309(84.43)  | 322(45.61)  | 448(45.16)  | 395(48.59)  | 762(62.56)  | 523(63.16)  |
| Fourth                                                                      | 382(88.22)  | 710(50.25)  | 621(50.74)  | 180(79.92)  | 193(38.14)  | 367(44.48)  | 299(46.00)  | 583(61.50)  | 446(66.77)  |
| Fifth & above                                                               | 688(79.72)  | 1245(43.02) | 1161(50.24) | 252(69.61)  | 335(36.81)  | 852(38.69)  | 666(39.53)  | 1456(55.34) | 951(61.39)  |
| p-value                                                                     | < 0.001     | < 0.001     | 0.383       | < 0.001     | 0.001       | < 0.001     | < 0.001     | < 0.001     | 0.043       |
| Frequency of listening to radio/ watching TV/ reading newspaper or magazine |             |             |             |             |             |             |             |             |             |
| Not at all                                                                  | 288(70.07)  | 1044(39.77) | 2127(47.85) | 178(62.24)  | 298(42.63)  | 308(34.00)  | 394(37.60)  | 1051(53.54) | 1640(63.25) |
| Less than once a week                                                       | 646(81.46)  | 671(51.14)  | 829(49.11)  | 355(76.84)  | 481(42.87)  | 442(37.91)  | 836(44.83)  | 724(59.69)  | 352(62.52)  |
| At least once a week                                                        | 1826(90.40) | 4074(57.84) | 1832(53.76) | 1271(82.75) | 1184(45.75) | 2220(49.55) | 1434(54.67) | 3056(63.63) | 473(66.25)  |
| p-value                                                                     | < 0.001     | < 0.001     | < 0.001     | < 0.001     | 0.147       | < 0.001     | < 0.001     | < 0.001     | 0.264       |

**Univariate analysis magnitude (ORs and 95% CI) of sociodemographic characteristics for 4+ANC visits**

As shown on Table 3, adequate ANC visit was lower among young women (15-19 years) in all countries than young adults and adult women (except in Tanzania and Uganda). This difference was significant in Ghana, Kenya, Malawi, Senegal, and Namibia. Four or more ANC use was lower by 2%-60% among rural residents compared to urban across all countries except in Zambia, in which women from rural places were 26% more to attend 4+ANC compared to their counterparts, and the difference was significant in all countries except in Rwanda.

Women’s and husband’s higher educational level of secondary and above has a significant positive association with 4+ ANC visits across all countries in this study.

**Table 3. Univariate analysis of sociodemographic factors influencing 4+ ANC visits in nine sub-Saharan countries.**

|                     | Ghana                    | Kenya                  | Malawi                 | Namibia                 | Rwanda                 | Senegal                | Tanzania                | Uganda                 | Zambia                 | Total                  |
|---------------------|--------------------------|------------------------|------------------------|-------------------------|------------------------|------------------------|-------------------------|------------------------|------------------------|------------------------|
| Variables           | (3,224)                  | (10,981)               | (9,541)                | (2,286)                 | (4,416)                | (6,552)                | (5,536)                 | (7,979)                | (5,487)                | (56,002)               |
| Age (grouped)       |                          |                        |                        |                         |                        |                        |                         |                        |                        |                        |
| 15-19               | 1.00[Ref]                | 1.00[Ref]              | 1.00[Ref]              | 1.00[Ref]               | 1.00[Ref]              | 1.00[Ref]              | 1.00[Ref]               | 1.00[Ref]              | 1.00[Ref]              | 1.00[Ref]              |
| 20-24               | 1.40(0.92,2.13)          | <b>1.32(1.13,1.54)</b> | <b>1.21(1.05,1.39)</b> | <b>1.79(1.28,2.50)</b>  | 1.26(0.88,1.79)        | <b>1.34(1.10,1.62)</b> | 1.10(0.90,1.34)         | 1.15(0.98,1.36)        | 1.17(0.97,1.41)        | <b>1.21(1.13,1.29)</b> |
| 25-29               | <b>1.89(1.24,2.87)</b>   | <b>1.37(1.18,1.60)</b> | <b>1.38(1.19,1.60)</b> | <b>2.21(1.56,3.13)</b>  | 1.36(0.96,1.93)        | <b>1.31(1.08,1.59)</b> | 1.16(0.95,1.42)         | 1.18(0.99,1.39)        | 1.07(0.89,1.30)        | <b>1.27(1.19,1.36)</b> |
| 30-34               | <b>1.70(1.12,2.58)</b>   | <b>1.26(1.07,1.48)</b> | <b>1.43(1.22,1.66)</b> | <b>2.34(1.61,3.40)</b>  | 1.15(0.81,1.64)        | <b>1.28(1.05,1.57)</b> | 1.07(0.87,1.32)         | 1.11(0.94,1.33)        | 1.16(0.95,1.42)        | <b>1.23(1.15,1.32)</b> |
| 35 and above        | <b>1.52(1.01,2.29)</b>   | 1.10(0.93,1.29)        | <b>1.39(1.19,1.62)</b> | <b>1.90(1.33,2.71)</b>  | 1.03(0.72,1.46)        | 1.14(0.94,1.39)        | 0.87(0.71,1.07)         | <b>0.83(0.70,0.99)</b> | 1.04(0.85,1.26)        | <b>1.10(1.02,1.17)</b> |
| Place of residence  |                          |                        |                        |                         |                        |                        |                         |                        |                        |                        |
| Urban               | 1.00[Ref]                | 1.00[Ref]              | 1.00[Ref]              | 1.00[Ref]               | 1.00[Ref]              | 1.00[Ref]              | 1.00[Ref]               | 1.00[Ref]              | 1.00[Ref]              | 1.00[Ref]              |
| Rural               | <b>0.40(0.32,0.50)</b>   | <b>0.60(0.55,0.65)</b> | <b>0.69(0.62,0.77)</b> | <b>0.66(0.54,0.81)</b>  | 0.98(0.85,1.13)        | <b>0.43(0.38,0.47)</b> | <b>0.52(0.45,0.58)</b>  | <b>0.68(0.60,0.76)</b> | <b>1.26(1.12,1.42)</b> | <b>0.61(0.59,0.63)</b> |
| Mother's education  |                          |                        |                        |                         |                        |                        |                         |                        |                        |                        |
| No schooling        | 1.00[Ref]                | 1.00[Ref]              | 1.00[Ref]              | 1.00[Ref]               | 1.00[Ref]              | 1.00[Ref]              | 1.00[Ref]               | 1.00[Ref]              | 1.00[Ref]              | 1.00[Ref]              |
| Primary             | 1.23(0.96,1.58)          | <b>1.49(1.35,1.65)</b> | <b>1.15(1.01,1.30)</b> | <b>1.77(1.24,2.51)</b>  | <b>1.33(1.11,1.59)</b> | <b>1.70(1.50,1.93)</b> | <b>1.40(1.22,1.62)</b>  | 1.13(0.99,1.30)        | <b>1.22(1.01,1.47)</b> | <b>1.30(1.25,1.36)</b> |
| Secondary           | <b>2.61(2.06,3.30)</b>   | <b>2.23(1.98,2.51)</b> | <b>1.38(1.18,1.60)</b> | <b>3.41(2.46,4.72)</b>  | <b>1.40(1.11,1.77)</b> | <b>2.13(1.76,2.58)</b> | <b>2.36(1.99,2.80)</b>  | <b>1.61(1.37,1.90)</b> | 1.18(0.97,1.43)        | <b>2.21(2.10,2.33)</b> |
| Higher              | <b>33.59(4.7,241.59)</b> | <b>5.91(4.85,7.20)</b> | <b>3.72(2.58,5.37)</b> | <b>14.43(5.6,37.14)</b> | <b>4.91(3.11,7.78)</b> | <b>7.11(2.43,20.8)</b> | <b>8.54(3.98,18.35)</b> | <b>2.65(2.06,3.40)</b> | <b>3.38(2.28,5.01)</b> | <b>4.97(4.42,5.58)</b> |
| Husband's education |                          |                        |                        |                         |                        |                        |                         |                        |                        |                        |
| No schooling        | 1.00[Ref]                | 1.00[Ref]              | 1.00[Ref]              | 1.00[Ref]               | 1.00[Ref]              | 1.00[Ref]              | 1.00[Ref]               | 1.00[Ref]              | 1.00[Ref]              | 1.00[Ref]              |
| Primary             | <b>1.35(0.97,1.87)</b>   | <b>1.57(1.34,1.84)</b> | 1.03(0.88,1.20)        | <b>1.46(0.96,2.22)</b>  | <b>1.23(1.03,1.47)</b> | <b>1.82(1.54,2.15)</b> | <b>1.47(1.23,1.76)</b>  | 0.95(0.80,1.14)        | 1.11(0.84,1.45)        | <b>1.25(1.19,1.31)</b> |
| Secondary           | <b>2.05(1.63,2.58)</b>   | <b>2.27(1.90,2.71)</b> | <b>1.21(1.03,1.43)</b> | <b>2.38(1.66,3.43)</b>  | 1.17(0.90,1.51)        | <b>2.38(1.95,2.91)</b> | <b>2.59(2.10,3.20)</b>  | <b>1.33(1.09,1.62)</b> | 1.09(0.84,1.43)        | <b>2.06(1.95,2.18)</b> |
| Higher              | <b>7.03(3.66,13.49)</b>  | <b>4.19(3.27,5.37)</b> | <b>2.25(1.73,2.92)</b> | 14.40(4.38,47.36)       | <b>2.49(1.72,3.60)</b> | <b>3.12(2.12,4.58)</b> | <b>3.98(2.57,6.18)</b>  | <b>1.96(1.55,2.50)</b> | <b>2.26(1.58,3.24)</b> | <b>3.52(3.19,3.88)</b> |
| Mother's occupation |                          |                        |                        |                         |                        |                        |                         |                        |                        |                        |



|    |                                                                             |                          |                        |                        |                        |                        |                        |                        |                        |                        |                        |
|----|-----------------------------------------------------------------------------|--------------------------|------------------------|------------------------|------------------------|------------------------|------------------------|------------------------|------------------------|------------------------|------------------------|
| 1  |                                                                             |                          |                        |                        |                        |                        |                        |                        |                        |                        |                        |
| 2  |                                                                             |                          |                        |                        |                        |                        |                        |                        |                        |                        |                        |
| 3  |                                                                             |                          |                        |                        |                        |                        |                        |                        |                        |                        |                        |
| 4  |                                                                             |                          |                        |                        |                        |                        |                        |                        |                        |                        |                        |
| 5  | Not working O/H                                                             | 1.00[Ref]                | 1.00[Ref]              | 1.00[Ref]              | 1.00[Ref]              | 1.00[Ref]              | 1.00[Ref]              | 1.00[Ref]              | 1.00[Ref]              | 1.00[Ref]              | 1.00[Ref]              |
| 6  | Professional/Skilled work                                                   | <b>2.27(1.73,2.97)</b>   | <b>2.33(1.86,2.91)</b> | <b>1.35(1.17,1.56)</b> | <b>1.88(1.47,2.40)</b> | <b>1.45(1.11,1.89)</b> | <b>1.33(1.17,1.51)</b> | <b>1.72(1.35,2.19)</b> | <b>1.42(1.23,1.63)</b> | <b>1.29(1.10,1.51)</b> | <b>1.73(1.64,1.82)</b> |
| 7  | Agriculture                                                                 | 0.80(0.62,1.03)          | 0.95(0.83,1.09)        | 1.05(0.95,1.15)        | 2.26(0.95,5.39)        | 1.20(0.95,1.51)        | <b>0.62(0.54,0.71)</b> | <b>0.63(0.55,0.73)</b> | <b>1.06(0.93,1.20)</b> | <b>1.24(1.08,1.42)</b> | <b>0.87(0.84,0.91)</b> |
| 8  | Unskilled                                                                   | <b>8.02(1.94,33.15)</b>  | <b>1.25(1.10,1.43)</b> | 1.12(0.99,1.27)        | <b>1.72(1.22,2.42)</b> | 0.84(0.58,1.21)        | <b>1.40(1.16,1.68)</b> | 1.09(0.92,1.29)        | <b>1.58(1.31,1.91)</b> | 1.02(0.84,1.24)        | <b>1.13(1.07,1.20)</b> |
| 9  | Husband's occupation                                                        |                          |                        |                        |                        |                        |                        |                        |                        |                        |                        |
| 10 |                                                                             |                          |                        |                        |                        |                        |                        |                        |                        |                        |                        |
| 11 | Not working O/H                                                             |                          | 1.00[Ref]              |
| 12 | Professional/Skilled work                                                   | 1.00[Ref]                | 1.54(0.99,2.39)        | <b>1.18(1.00,1.39)</b> | 0.65(0.08,5.28)        | 0.82(0.37,1.84)        | 1.06(0.78,1.46)        | <b>2.21(1.17,4.16)</b> | <b>1.32(1.00,1.74)</b> | 1.16(0.92,1.45)        | <b>1.35(1.22,1.49)</b> |
| 13 | Agriculture                                                                 | <b>0.30(0.23,0.39)</b>   | 0.76(0.49,1.18)        | 0.98(0.84,1.15)        | 0.27(0.03,2.18)        | 0.86(0.38,1.92)        | <b>0.52(0.38,0.72)</b> | <b>1.16(0.62,2.17)</b> | 0.86(0.65,1.14)        | 1.21(0.97,1.51)        | <b>0.86(0.78,0.95)</b> |
| 14 | Unskilled                                                                   | 0.89(0.60,1.32)          | 1.09(0.71,1.69)        | 1.00(0.85,1.19)        | 0.55(0.07,4.51)        | 0.74(0.32,1.67)        | 0.96(0.69,1.34)        | 1.97(1.04,3.72)        | 1.15(0.85,1.55)        | 0.97(0.76,1.24)        | 1.10(0.99,1.22)        |
| 15 | Wealth quintile                                                             |                          |                        |                        |                        |                        |                        |                        |                        |                        |                        |
| 16 |                                                                             |                          |                        |                        |                        |                        |                        |                        |                        |                        |                        |
| 17 | Poorest                                                                     | 1.00[Ref]                | 1.00[Ref]              | 1.00[Ref]              | 1.00[Ref]              | 1.00[Ref]              | 1.00[Ref]              | 1.00[Ref]              | 1.00[Ref]              | 1.00[Ref]              | 1.00[Ref]              |
| 18 | Poorer                                                                      | 1.22(0.96,1.56)          | <b>1.37(1.23,1.52)</b> | 1.11(0.98,1.25)        | 1.03(0.77,1.37)        | 1.15(0.96,1.37)        | <b>1.50(1.31,1.72)</b> | 1.13(0.95,1.33)        | <b>1.16(1.02,1.32)</b> | 1.04(0.89,1.22)        | <b>1.19(1.14,1.25)</b> |
| 19 | Middle                                                                      | <b>1.67(1.26,2.20)</b>   | <b>1.70(1.52,1.90)</b> | 1.07(0.95,1.21)        | <b>1.40(1.04,1.88)</b> | <b>1.22(1.01,1.47)</b> | <b>2.10(1.82,2.42)</b> | <b>1.35(1.14,1.59)</b> | <b>1.25(1.09,1.43)</b> | 0.90(0.76,1.05)        | <b>1.34(1.27,1.41)</b> |
| 20 | Richer                                                                      | <b>4.40(2.94,6.59)</b>   | <b>2.12(1.89,2.39)</b> | <b>1.19(1.05,1.35)</b> | <b>1.70(1.25,2.31)</b> | 1.18(0.98,1.43)        | <b>3.48(2.96,4.10)</b> | <b>2.07(1.76,2.44)</b> | <b>1.48(1.29,1.71)</b> | <b>0.72(0.61,0.86)</b> | <b>1.60(1.52,1.69)</b> |
| 21 | Richest                                                                     | <b>13.36(6.53,27.33)</b> | <b>3.41(3.00,3.88)</b> | <b>1.65(1.45,1.87)</b> | <b>2.59(1.77,3.80)</b> | 1.10(0.92,1.32)        | <b>5.93(4.81,7.31)</b> | <b>3.02(2.53,3.60)</b> | 1.87(1.62,2.16)        | 1.18(0.98,1.42)        | <b>2.13(2.02,2.25)</b> |
| 22 | Birth order                                                                 |                          |                        |                        |                        |                        |                        |                        |                        |                        |                        |
| 23 |                                                                             |                          |                        |                        |                        |                        |                        |                        |                        |                        |                        |
| 24 | First                                                                       | 1.00[Ref]                | 1.00[Ref]              | 1.00[Ref]              | 1.00[Ref]              | 1.00[Ref]              | 1.00[Ref]              | 1.00[Ref]              | 1.00[Ref]              | 1.00[Ref]              | 1.00[Ref]              |
| 25 | Second                                                                      | 1.18(0.85,1.65)          | 0.91(0.81,1.02)        | <b>0.89(0.79,1.00)</b> | 1.14(0.86,1.50)        | 0.88(0.74,1.03)        | 0.93(0.79,1.08)        | <b>0.82(0.70,0.97)</b> | 1.01(0.87,1.16)        | 0.97(0.82,1.14)        | <b>0.93(0.88,0.98)</b> |
| 26 | Third                                                                       | 0.85(0.62,1.18)          | <b>0.80(0.71,0.91)</b> | 0.97(0.85,1.10)        | <b>1.41(1.01,1.96)</b> | 0.83(0.69,1.00)        | <b>0.75(0.64,0.88)</b> | <b>0.72(0.61,0.86)</b> | 0.95(0.82,1.11)        | 0.89(0.74,1.06)        | <b>0.87(0.82,0.92)</b> |
| 27 | Fourth                                                                      | 1.06(0.74,1.53)          | <b>0.68(0.60,0.78)</b> | 0.98(0.86,1.12)        | 0.86(0.61,1.23)        | <b>0.61(0.50,0.76)</b> | <b>0.73(0.61,0.87)</b> | <b>0.65(0.54,0.79)</b> | 0.91(0.77,1.07)        | 1.04(0.85,1.26)        | <b>0.81(0.76,0.86)</b> |
| 28 | Fifth & above                                                               | <b>0.56(0.42,0.73)</b>   | <b>0.51(0.46,0.57)</b> | 0.96(0.86,1.08)        | <b>0.59(0.45,0.79)</b> | <b>0.58(0.49,0.69)</b> | <b>0.58(0.50,0.66)</b> | <b>0.50(0.43,0.58)</b> | <b>0.71(0.62,0.80)</b> | <b>0.82(0.71,0.96)</b> | <b>0.65(0.62,0.68)</b> |
| 29 | Frequency of listening to radio/ watching TV/ reading newspaper or magazine |                          |                        |                        |                        |                        |                        |                        |                        |                        |                        |
| 30 |                                                                             |                          |                        |                        |                        |                        |                        |                        |                        |                        |                        |
| 31 | Not at all                                                                  | 1.00[Ref]                | 1.00[Ref]              | 1.00[Ref]              | 1.00[Ref]              | 1.00[Ref]              | 1.00[Ref]              | 1.00[Ref]              | 1.00[Ref]              | 1.00[Ref]              | 1.00[Ref]              |
| 32 |                                                                             |                          |                        |                        |                        |                        |                        |                        |                        |                        |                        |
| 33 |                                                                             |                          |                        |                        |                        |                        |                        |                        |                        |                        |                        |
| 34 |                                                                             |                          |                        |                        |                        |                        |                        |                        |                        |                        |                        |
| 35 |                                                                             |                          |                        |                        |                        |                        |                        |                        |                        |                        |                        |
| 36 |                                                                             |                          |                        |                        |                        |                        |                        |                        |                        |                        |                        |
| 37 |                                                                             |                          |                        |                        |                        |                        |                        |                        |                        |                        |                        |
| 38 |                                                                             |                          |                        |                        |                        |                        |                        |                        |                        |                        |                        |
| 39 |                                                                             |                          |                        |                        |                        |                        |                        |                        |                        |                        |                        |
| 40 |                                                                             |                          |                        |                        |                        |                        |                        |                        |                        |                        |                        |
| 41 |                                                                             |                          |                        |                        |                        |                        |                        |                        |                        |                        |                        |
| 42 |                                                                             |                          |                        |                        |                        |                        |                        |                        |                        |                        |                        |
| 43 |                                                                             |                          |                        |                        |                        |                        |                        |                        |                        |                        |                        |
| 44 |                                                                             |                          |                        |                        |                        |                        |                        |                        |                        |                        |                        |
| 45 |                                                                             |                          |                        |                        |                        |                        |                        |                        |                        |                        |                        |
| 46 |                                                                             |                          |                        |                        |                        |                        |                        |                        |                        |                        |                        |

|                       |                        |                        |                        |                        |                 |                        |                        |                        |                 |                        |
|-----------------------|------------------------|------------------------|------------------------|------------------------|-----------------|------------------------|------------------------|------------------------|-----------------|------------------------|
| Less than once a week | <b>1.88(1.42,2.48)</b> | <b>1.59(1.39,1.81)</b> | 1.05(0.94,1.18)        | <b>2.01(1.46,2.78)</b> | 1.01(0.83,1.22) | 1.19(0.99,1.42)        | <b>1.35(1.16,1.57)</b> | <b>1.29(1.11,1.49)</b> | 0.97(0.80,1.17) | <b>1.15(1.09,1.21)</b> |
| At least once a week  | <b>4.02(3.11,5.20)</b> | <b>2.08(1.90,2.28)</b> | <b>1.27(1.16,1.39)</b> | <b>2.91(2.21,3.83)</b> | 1.14(0.96,1.34) | <b>1.91(1.64,2.22)</b> | <b>2.00(1.73,2.32)</b> | <b>1.52(1.37,1.69)</b> | 1.14(0.96,1.36) | <b>1.53(1.47,1.59)</b> |

**Bold font indicates a significant difference from reference at p<0.05.** O/H: outside home.

For peer review only

1  
2  
3 Women of the professional work category were significantly higher on 4+ANC  
4 visits than women who do not work outside the home, and this difference was  
5 consistent across all countries. The strength of the association of women's  
6 socioeconomic status and 4+ANC visits showed considerable variation. For example,  
7 the magnitude of ORs for 4+ANC among the richest women varies from 1.10(0.92,  
8 1.32) in Rwanda to 13.36(6.53, 27.33) in Ghana.  
9  
10  
11  
12  
13  
14  
15  
16

17 The 4+ANC utilization pattern shows an inverse relationship with the mother's  
18 previous pregnancy experience, and the difference was significant. The magnitude of  
19 ORs of 4+ANC was lower from 4%-50% among fifth and above birth women than  
20 among first births. Listening to radio/ watching TV/ reading newspaper or magazine  
21 has a significant positive association with 4+ANC attendance across all countries  
22 except in Rwanda and Zambia (Table 3).  
23  
24  
25  
26  
27  
28  
29  
30  
31

### 32 **Multivariable findings**

33  
34 Table 4 summarizes data analysis results adjusted by sociodemographic variables  
35 and the overall adjusted by cluster (country).  
36  
37  
38

39 Overall, the 4+ ANC visits were 14% lower among women from the rural area  
40 than from urban, and the difference was significant (AOR, 0.86; 95% CI: 0.81,0.91).  
41 Multivariable logistic regression analysis exploring the relationship between 4+ ANC  
42 visits and place of residence was significant in four countries (Kenya, Malawi,  
43 Senegal and Zambia). While in Ghana, Namibia, Rwanda, Tanzania, and Uganda;  
44 4+ANC visit and women place of residence has no association. Unlike all countries,  
45 in Zambia, the proportion of 4+ANC visits was significantly higher among women  
46 from rural areas than from urban.  
47  
48  
49  
50  
51  
52  
53  
54  
55  
56

57 Findings of selected sociodemographic predictors related to ANC visit after  
58 adjusted for cluster (country) variations indicated that the use of ANC service increase  
59  
60

1  
2  
3 from 14% (AOR=1.14, 95%CI 1.07-1.21,  $p<0.001$ ) to 96% (AOR=1.96, 95% CI  
4 1.65-2.33,  $p<0.001$ ) with an increase in mother's educational level compared to  
5 mothers who have not attended any education. The odds of 4+ANC visits were higher  
6 among women with higher educational levels than women who have not schooled in  
7 all countries, but the difference was only significant in Kenya, Malawi, Rwanda, and  
8 Zambia. Husband's higher academic level was significantly associated with 12%-48%  
9 higher odds of women 4+ANC visit ( $p<0.001$ ). Even though the husband's education  
10 is related to 4+ANC visits across all the studied countries, the association is  
11 meaningful after adjusting only in three countries; Kenya, Malawi, and Zambia.  
12  
13  
14  
15  
16  
17  
18  
19  
20  
21  
22  
23

24 Women in the wealthiest group were found to be highly likely to receive more  
25 4+ANC visits. After adjusting for the cluster (country), ANC service utilization  
26 increased consistently from 12%, 18%, 32%, and 41% for every 20% variation on the  
27 wealth category compared to the most deficient level, and the difference was  
28 significant ( $p<0.001$ ) (Table 4). Across the studied countries, household's economic  
29 status has a positive association with higher 4+ANC visits except in Rwanda. The  
30 proportions of 4+ANC visits were 4% (AOR=0.96, 95% CI; 0.78-1.19 and 14%  
31 (AOR=0.86, 95% CI; 0.64-1.16) lower among middle and richer economic status in  
32 Zambia after adjusted for the other variables, and the difference was none significant  
33 ( $p>0.05$ ).  
34  
35  
36  
37  
38  
39  
40  
41  
42  
43  
44  
45  
46

47 Overall, women's occupation has a positive association with 4+ANC visits. The  
48 variation on 4+ANC visits was 19%, 7%, and 13% more among women working as  
49 Professional/Skilled, Agriculture, and Unskilled labour. Employed women on an  
50 unskilled level in Ghana were more than fifteen times (AOR, 15.54, 95%CI; 2.1,  
51 114.9) more to attend 4+ANC visits than women who have no work outside the home.  
52 Another similar group, women in Uganda, were 62% more to attend 4+ANC (AOR,  
53  
54  
55  
56  
57  
58  
59  
60

1  
2  
3 1.62, 95%CI; 1.28, 2.05), and the difference was significant. Women employed in  
4 agriculture in Kenya, Senegal, and Tanzania and unskilled worker in Rwanda,  
5 Tanzania, and Zambia, were on lower uptake of 4+ANC, and the association was not  
6 significant.  
7  
8  
9  
10  
11

12 Women with previous experience on birth have a disadvantage in ANC  
13 utilization. Four or more ANC use's odds were lower by 16%, 21%, 23%, and 32%  
14 for second, third, fourth, and fifth and above than the first birth women. All this  
15 difference was significant ( $p < 0.001$ ) (Table 4). Country wise analysis shows, the  
16 difference in birth order and 4+ANC visits were significant in Kenya, Rwanda,  
17 Senegal, Tanzania, Uganda, and Zambia.  
18  
19  
20  
21  
22  
23  
24  
25

26 Women who have access to media at least once a week relates with the use of  
27 4+ANC up-to 22% higher than women who have not at all (AOR, 1.22, 95%CI;  
28 1.15,1.29). This association was significant in all countries except in Malawi,  
29 Rwanda, Senegal, and Zambia.  
30  
31  
32  
33  
34  
35  
36  
37  
38  
39  
40  
41  
42  
43  
44  
45  
46  
47  
48  
49  
50  
51  
52  
53  
54  
55  
56  
57  
58  
59  
60

**Table 4. Adjusted multivariable analysis of sociodemographic factors influencing 4+ ANC visits in nine sub-Saharan countries.**

| Variables                 | Ghana                   | Kenya                  | Malawi                 | Namibia                | Rwanda                 | Senegal                | Tanzania               | Uganda                 | Zambia                 | Overall *              |
|---------------------------|-------------------------|------------------------|------------------------|------------------------|------------------------|------------------------|------------------------|------------------------|------------------------|------------------------|
| Place of residence        |                         |                        |                        |                        |                        |                        |                        |                        |                        |                        |
| Urban                     | 1.00[Ref]               | 1.00[Ref]              | 1.00[Ref]              | 1.00[Ref]              | 1.00[Ref]              | 1.00[Ref]              | 1.00[Ref]              | 1.00[Ref]              | 1.00[Ref]              | 1.00[Ref]              |
| Rural                     | 0.84(0.61,1.15)         | <b>0.83(0.72,0.9)</b>  | <b>0.83(0.71,0.96)</b> | 0.83(0.57,1.21)        | 0.95(0.77,1.18)        | <b>0.73(0.62,0.84)</b> | 0.83(0.69,1.01)        | 0.86(0.72,1.01)        | <b>1.48(1.2,1.82)</b>  | <b>0.86(0.81,0.91)</b> |
| Mother's education        |                         |                        |                        |                        |                        |                        |                        |                        |                        |                        |
| No schooling              | 1.00[Ref]               | 1.00[Ref]              | 1.00[Ref]              | 1.00[Ref]              | 1.00[Ref]              | 1.00[Ref]              | 1.00[Ref]              | 1.00[Ref]              | 1.00[Ref]              | 1.00[Ref]              |
| Primary                   | 1.06(0.78,1.43)         | 1.12(0.90,1.39)        | 1.09(0.94,1.27)        | 1.34(0.83,2.16)        | 1.20(0.99,1.46)        | 1.06(0.91,1.23)        | 1.04(0.88,1.22)        | 1.03(0.87,1.22)        | 1.12(0.90,1.41)        | <b>1.14(1.07,1.21)</b> |
| Secondary                 | <b>1.47(1.05,2.05)</b>  | 1.23(0.94,1.60)        | 1.11(0.91,1.35)        | <b>1.78(1.04,3.05)</b> | 1.28(0.95,1.74)        | 1.08(0.84,1.4)         | 1.00(0.79,1.28)        | 1.19(0.96,1.47)        | 1.05(0.81,1.38)        | <b>1.17(1.08,1.21)</b> |
| Higher                    | 4.82(0.6,37.23)         | <b>2.17(1.42,3.32)</b> | <b>2.26(1.42,3.60)</b> | 2.13(0.51,8.93)        | <b>3.82(2.17,6.73)</b> | 1.78(0.58,5.47)        | 2.19(0.91,5.30)        | 1.30(0.92,1.83)        | <b>2.06(1.20,3.55)</b> | <b>1.96(1.65,2.33)</b> |
| Husband's education       |                         |                        |                        |                        |                        |                        |                        |                        |                        |                        |
| No schooling              | 1.00[Ref]               | 1.00[Ref]              | 1.00[Ref]              | 1.00[Ref]              | 1.00[Ref]              | 1.00[Ref]              | 1.00[Ref]              | 1.00[Ref]              | 1.00[Ref]              | 1.00[Ref]              |
| Primary                   | 1.04(0.73,1.48)         | 1.08(0.87,1.36)        | 0.97(0.83,1.15)        | 1.11(0.71,1.75)        | 1.10(0.91,1.33)        | <b>1.35(1.13,1.61)</b> | 1.18(0.98,1.42)        | 0.86(0.70,1.05)        | 1.07(0.81,1.42)        | <b>1.12(1.05,1.20)</b> |
| Secondary                 | 0.97(0.72,1.33)         | 1.20(0.93,1.56)        | 1.06(0.88,1.27)        | 1.21(0.77,1.88)        | 0.93(0.69,1.24)        | <b>1.36(1.09,1.71)</b> | <b>1.35(1.05,1.72)</b> | 1.01(0.80,1.26)        | 1.15(0.86,1.54)        | <b>1.17(1.09,1.27)</b> |
| Higher                    | 1.42(0.69,2.93)         | <b>1.41(1.00,1.97)</b> | <b>1.42(1.03,1.95)</b> | 3.57(0.9,14.17)        | 1.42(0.88,2.27)        | 1.32(0.86,2.02)        | 1.38(0.84,2.27)        | 1.22(0.91,1.63)        | <b>1.91(1.23,2.96)</b> | <b>1.48(1.31,1.69)</b> |
| Mother's occupation       |                         |                        |                        |                        |                        |                        |                        |                        |                        |                        |
| Not working O/H           | 1.00[Ref]               | 1.00[Ref]              | 1.00[Ref]              | 1.00[Ref]              | 1.00[Ref]              | 1.00[Ref]              | 1.00[Ref]              | 1.00[Ref]              | 1.00[Ref]              | 1.00[Ref]              |
| Professional/Skilled work | <b>1.99(1.46,2.27)</b>  | 1.19(0.91,1.56)        | 0.97(0.81,1.15)        | <b>1.64(1.11,2.44)</b> | 1.23(0.91,1.66)        | 1.09(0.94,1.26)        | 1.24(0.93,1.65)        | <b>1.38(1.18,1.62)</b> | <b>1.24(1.01,1.50)</b> | <b>1.19(1.11,1.27)</b> |
| Agriculture               | <b>1.44(1.06,1.97)</b>  | 0.98(0.83,1.15)        | 1.08(0.96,1.19)        | 2.25(0.75,6.72)        | 1.16(0.87,1.53)        | 0.89(0.76,1.04)        | 0.89(0.75,1.07)        | <b>1.26(1.09,1.46)</b> | 1.14(0.96,1.35)        | <b>1.07(1.01,1.13)</b> |
| Unskilled                 | <b>15.54(2.1,114.9)</b> | 1.06(0.91,1.24)        | 1.07(0.92,1.22)        | 1.58(0.85,2.97)        | 0.79(0.52,1.21)        | 1.09(0.87,1.35)        | 0.95(0.78,1.16)        | <b>1.62(1.28,2.05)</b> | 0.96(0.76,1.23)        | <b>1.13(1.05,1.21)</b> |
| Wealth quintile           |                         |                        |                        |                        |                        |                        |                        |                        |                        |                        |
| Poorest                   | 1.00[Ref]               | 1.00[Ref]              | 1.00[Ref]              | 1.00[Ref]              | 1.00[Ref]              | 1.00[Ref]              | 1.00[Ref]              | 1.00[Ref]              | 1.00[Ref]              | 1.00[Ref]              |
| Poorer                    | 0.93(0.70,1.23)         | 1.09(0.91,1.32)        | 1.07(0.94,1.23)        | 0.74(0.48,1.13)        | 1.06(0.87,1.28)        | <b>1.37(1.19,1.58)</b> | 1.05(0.87,1.26)        | <b>1.18(1.02,1.37)</b> | 1.09(0.91,1.32)        | <b>1.12(1.06,1.19)</b> |

1  
2  
3  
4  
5  
6  
7  
8  
9  
10  
11  
12  
13  
14  
15  
16  
17  
18  
19  
20  
21  
22  
23  
24  
25  
26  
27  
28  
29  
30  
31  
32  
33  
34  
35  
36  
37  
38  
39  
40  
41  
42  
43  
44  
45  
46

|                                                                 |                         |                        |                        |                        |                        |                        |                        |                        |                        |                        |
|-----------------------------------------------------------------|-------------------------|------------------------|------------------------|------------------------|------------------------|------------------------|------------------------|------------------------|------------------------|------------------------|
| Middle                                                          | 0.93(0.64,1.36)         | 1.18(0.96,1.45)        | 1.09(0.94,1.26)        | 0.85(0.53,1.36)        | 1.12(0.91,1.37)        | <b>1.56(1.32,1.86)</b> | 1.15(0.95,1.40)        | <b>1.19(1.01,1.40)</b> | 0.96(0.78,1.19)        | <b>1.18(1.11,1.26)</b> |
| Richer                                                          | <b>1.88(1.09,3.23)</b>  | 1.21(0.97,1.51)        | 1.07(0.92,1.25)        | 0.79(0.45,1.40)        | 1.04(0.84,1.30)        | <b>2.26(1.83,2.79)</b> | <b>1.62(1.31,2.00)</b> | <b>1.29(1.08,1.5)</b>  | 0.86(0.64,1.16)        | <b>1.32(1.23,1.42)</b> |
| Richest                                                         | <b>4.74(1.9,11.95)</b>  | <b>1.55(1.19,2.04)</b> | <b>1.23(1.02,1.50)</b> | 1.31(0.57,3.00)        | 0.77(0.57,1.02)        | <b>3.62(2.78,4.72)</b> | <b>1.69(1.27,2.24)</b> | <b>1.27(1.02,1.60)</b> | 1.17(0.81,1.69)        | <b>1.41,1.29,1.55)</b> |
| Birth order                                                     |                         |                        |                        |                        |                        |                        |                        |                        |                        |                        |
| First                                                           | 1.00[Ref]               | 1.00[Ref]              | 1.00[Ref]              | 1.00[Ref]              | 1.00[Ref]              | 1.00[Ref]              | 1.00[Ref]              | 1.00[Ref]              | 1.00[Ref]              | 1.00[Ref]              |
| Second                                                          | 1.08(0.72,1.63)         | <b>0.71(0.58,0.87)</b> | <b>0.83(0.72,0.95)</b> | 1.22(0.74,1.99)        | <b>0.72(0.60,0.87)</b> | 0.88(0.74,1.06)        | <b>0.82(0.68,1.00)</b> | 0.95(0.80,1.13)        | 0.87(0.70,1.08)        | <b>0.84(0.79,0.90)</b> |
| Third                                                           | 0.77(0.52,1.15)         | <b>0.62(0.51,0.76)</b> | 0.91(0.79,1.05)        | 1.06(0.64,1.76)        | <b>0.68(0.55,0.83)</b> | <b>0.78(0.65,0.94)</b> | <b>0.72(0.59,0.89)</b> | 0.97(0.81,1.16)        | <b>0.76(0.61,0.96)</b> | <b>0.79(0.74,0.85)</b> |
| Fourth                                                          | 1.06(0.69,1.64)         | <b>0.56(0.45,0.70)</b> | 0.95(0.82,1.11)        | 1.12(0.65,1.94)        | 0.52(0.42,0.66)        | <b>0.76(0.62,0.92)</b> | <b>0.71(0.57,0.88)</b> | 0.88(0.73,1.07)        | 0.91(0.71,1.17)        | <b>0.77(0.72,0.83)</b> |
| Fifth & above                                                   | 0.75(0.52,1.08)         | <b>0.50(0.41,0.61)</b> | 0.98(0.85,1.12)        | 0.79(0.49,1.26)        | <b>0.50(0.41,0.61)</b> | <b>0.68(0.58,0.80)</b> | <b>0.61(0.51,0.73)</b> | <b>0.77(0.65,0.90)</b> | <b>0.73(0.59,0.90)</b> | <b>0.68(0.64,0.73)</b> |
| Frequency of listening to the radio/reading newspaper/magazines |                         |                        |                        |                        |                        |                        |                        |                        |                        |                        |
| Not at all                                                      | 1.00[Ref]               | 1.00[Ref]              | 1.00[Ref]              | 1.00[Ref]              | 1.00[Ref]              | 1.00[Ref]              | 1.00[Ref]              | 1.00[Ref]              | 1.00[Ref]              | 1.00[Ref]              |
| Less than once a week                                           | <b>1.47(1.08, 2.00)</b> | <b>1.35(1.08,1.68)</b> | 1.05(0.94,1.20)        | <b>1.94(1.22,3.07)</b> | 0.95(0.78,1.17)        | 1.06(0.87,1.29)        | 1.11(0.93,1.33)        | 1.13(0.96,1.34)        | 1.01(0.80,1.28)        | <b>1.08(1.01,1.15)</b> |
| At least once a week                                            | <b>2.62(1.96,3.50)</b>  | <b>1.21(1.02,1.44)</b> | 1.09(0.98,1.22)        | <b>2.31(1.51,3.53)</b> | 1.07(0.88,1.30)        | 1.14(0.96,1.35)        | <b>1.34(1.12,1.60)</b> | <b>1.24(1.09,1.41)</b> | 1.05(0.85,1.30)        | <b>1.22(1.15,1.29)</b> |

All are adjusted for sociodemographic factors and media exposure. \* adjusted for sociodemographic factors, media exposure, and country. **bold font** indicates a significant difference from reference at p<0.05, O/H:

outside home

## Discussion

In an era of envision for every pregnant woman to receive quality care throughout her pregnancy, only 55.52% women in nine sub-Saharan Africa countries have received four or more uptake of ANC on average. This low proportion is comparable to the researches from Nigeria (53.3%)<sup>23</sup> and India (51.7%)<sup>22</sup>. Therefore, there is an urgent need on intervention towards maximizing the utilization of ANC in low income countries.

Pooled data adjusted by countries has shown that all sociodemographic variables (Rural place of residence, no women and husband's schooling, no maternal employment, poorest household economic status, lack of access to media and a history of previous births) were significantly associated with lower utilization of 4+ANC (Table 5). This is in line with previous studies<sup>6 10 14 17 20 22</sup>. Efforts focused on reaching adequate ANC by all women in sub-Saharan countries must be strengthened through community and regional marginalization. Programs on monitoring adequate ANC attendance and maternal health for disadvantaged women (Table-4) should be implemented. The roadmap for the integrative approach towards sustainable development goal 3 (SDG-3) achievement must be fully exercised within countries despite the projection on missing the SDG targets in the region<sup>4</sup>.

Country-level data showed that women's socioeconomic status is significantly associated with the likelihood of having 4+ANC visits. This is consistent with previous studies in developing countries<sup>7 8 20 24</sup>, and women in predominantly poor communities have lower odds of ANC visits<sup>10 17 20 22</sup>. Inequalities in wealth are baseline risks and critical determinants of poor maternal health, particularly in sub-Saharan countries<sup>4</sup>. Efforts are needed to address these disparities within



1  
2  
3 countries since new-born infants from poorer households often have worse health  
4  
5 outcomes than from wealthy households.  
6  
7

8 The overall progress made on 4+ANC visits was comparable with the 1990-2001  
9  
10 study across all the studied countries. Women from rural places made better  
11  
12 improvements than the urban residents except in Tanzania and Zambia<sup>6</sup>. Overall, the  
13  
14 odds of 4+ANC visits were lower by 5%-27% among rural women in eight of the  
15  
16 studied countries, and this was significant in Kenya, Malawi, and Senegal. However,  
17  
18 one data (Zambia) indicated a 48% more uptake of 4+ANCs by rural residents [Table  
19  
20 4]. This finding in Zambia is contrary to other studies <sup>21-23</sup>. For many conditions,  
21  
22 particularly in low-income SSA countries, premature illness and deaths can be averted  
23  
24 by removing barriers to accessing health service utilization for ANC. These can be  
25  
26 economical, as well as physical barriers <sup>11 24</sup>. To address the inequalities in the  
27  
28 utilization of ANC services, strategies that encompass intervention on regional  
29  
30 disparities to reach women living in rural areas with limited resources are essential.  
31  
32 Such programs should include a holistic approach to women education, income, free  
33  
34 or subsidized care, and transport interventions, similar to lessons from other studies in  
35  
36 the sub-Saharan countries <sup>8 20 26</sup>.  
37  
38  
39  
40  
41

42 Our findings revealed that women of first birth three years preceding the survey  
43  
44 were more likely to receive 4+ANC than older adults of second and above births  
45  
46 except in Namibia. Women of fifth and above births in Kenya and Rwanda were 50%  
47  
48 lower to attend 4+ANC than first birth women and the difference was significant in  
49  
50 Kenya, Rwanda, Senegal, Tanzania, Uganda, and Zambia, similar to previous  
51  
52 research studies <sup>17 31</sup>. Consistent to our findings in Namibia, research in Nigeria  
53  
54 suggested that adolescents are less likely to attend ANC services <sup>28</sup>.  
55  
56  
57  
58  
59  
60

1  
2  
3  
4  
5  
6  
7  
8  
9  
10  
11  
12  
13  
14  
15  
16  
17  
18  
19  
20  
21  
22  
23  
Listening to radio/ watching TV/ reading newspapers or magazines at least once a week has a positive association with the uptake of 4+ANC across all the studied countries. In two countries (Ghana and Namibia), women who have access to media were more than twice more likely to attend 4+ANC than women who have not at all, and the difference was significant. Although previous studies highlighted media plays a significant role in utilizing facility service for 4+ANC <sup>8 10 17 22</sup>, no association was detected in Rwanda, Senegal, Malawi, and Zambia. Therefore, further actions should be strengthened to increase the reach of ANC information among the studied countries.

24  
25  
26  
27  
28  
29  
30  
31  
32  
33  
34  
35  
36  
37  
38  
39  
40  
41  
42  
43  
44  
At the individual level, we found that women with secondary and higher education levels were the most likely to use 4+ANC visits than women with no schooling, in line with previous research studies <sup>6 8 10 17 22</sup>. This was consistent after adjustment, and the difference was significant in Kenya, Malawi, Rwanda, and Zambia. Similarly, husband's higher education level has a positive influence on women's 4+ANC visits across all the studied countries (Table 4). This difference was significant in Kenya, Malawi, and Zambia. Therefore, higher educational status women are at a lower risk of the ANC visit lost opportunities consistent with other research studies <sup>6 10 22</sup>.

45  
46  
47  
48  
49  
50  
51  
52  
53  
54  
55  
56  
57  
58  
59  
60  
Differences in service use for 4+ANC and women employment were not consistent in this study. In two countries Ghana and Uganda, employment outside the home during pregnancy was significantly associated with 4+ANC visits in support of the existing literature <sup>17</sup>. This could be due to overcoming the financial challenges similar to a study from India <sup>22</sup>. In this study, Tanzanian women employed in agriculture or as unskilled labor had lower 4+ANC visits than housewives /unemployed, similar to a lesson in Indonesia <sup>10</sup>.

1  
2  
3  
4  
5  
6  
7  
8  
9  
10  
11  
12  
13  
14  
15  
16  
17  
18  
19  
20  
21  
22  
23  
24  
25  
26  
27  
28  
29  
30  
31  
32  
33  
34  
35  
36  
37  
38  
39  
40  
41  
42  
43  
44  
45  
46  
47  
48  
49  
50  
51  
52  
53  
54  
55  
56  
57  
58  
59  
60

Despite the global efforts towards attaining the new commitment of SDG-3 on maternal and newborn health, countries in SSA like Rwanda, Senegal, Tanzania, Malawi, and Kenya are far below the required 4+ANC visits, similar to studies from other countries<sup>22 23</sup>. Although not all 100%, we need to look at the factors affecting ANC attendance inadequate coverage. Therefore, governments can share the best lessons from neighboring countries on ecological and socioeconomic factors and progress towards maternal health. In this study, Ghana and Namibia have shown 85.6% and 78.9% of 4+ANC visits across all reproductive age groups. Ghana's present finding is in line to the 2013 cross-sectional study conducted in three sites of Ghana, where 86% of women reported attending 4+ANC visits, which is probably due to the health insurance service in Ghana<sup>20</sup>. Very poor use of 4+ANC in Rwanda, Senegal, and Tanzania may have multiple and complex social, economic and demographic determinants deterring the required attendance of ANCs. Therefore, lessons on implementation of applauded interventions on ANC attendance from neighboring countries must be contextualized to maintain national and regional adequate ANC visits.

### **Conclusion and recommendation**

Four or more ANC service utilization is very low among women of the studied countries. Women from low economic class or region were less likely to attend the required 4+ANC visits. Sociodemographic factors (living in rural, no educational level, low-income family, and lack of access to media) have significant negative effect on the use of 4+ANC services. There is also heterogeneity between and within countries and the community. Regional and country-specific interventions are required to address the barriers to adequate ANC visits. Furthermore, exploring effective ways of increasing ANC service utilization must be enhanced among the

1  
2  
3 whole population in the region and particularly to young women, no schooled,  
4 low-income level, and multipara women. More caution is required to evaluate the gain  
5 of 4+ANC use among the better-off rather than the poor for the SDG achievement.  
6  
7

8  
9  
10 **Author Contributions:** Conceptualization, methodology, literature review, formal  
11 analysis, and writing original draft, AKA. Writing—review and editing, AKA.; LXZ.;  
12 ZZH.; MEM. and QQ. Supervision, LXZ. All authors read and approved the final  
13 manuscript.  
14  
15

16  
17  
18 **Funding:** The authors have not declared a specific grant for this research from any  
19 funding in the public, commercial or not-for-profit sectors.  
20  
21

22  
23  
24 **Acknowledgments:** The authors are grateful to the Measure DHS, ICF international,  
25 Rockville, Maryland, USA for providing the data for analysis. The authors are  
26 thankful to Fillimon Afewerki for preparing the geographical location of the study  
27 sites on the map.  
28  
29

30  
31  
32 **Competing interests:** None declared.  
33  
34

35  
36  
37 **Patients consent for publication:** Not required.  
38  
39

40  
41 **Ethics approval:** This study was exempt from review by the ethics committee as  
42 publicly available data sets were used and no identifying participant information was  
43 obtained. The authorization for using the data in the current analysis was granted from  
44 the DHS program: DHS, ICF international, Rockville, Maryland, USA office upon  
45 presenting the research protocol and research plan aims.  
46  
47

48  
49  
50 **Data availability statement:** Data sets used in the analysis are publicly available and  
51 can be accessed online through application to MEASURE DHS. Analysis syntaxes  
52 and outputs generated for the study can be made available upon request to the  
53 corresponding author.  
54  
55  
56  
57  
58  
59  
60

## References

1. WHO Recommendations on Antenatal Care for a Positive Pregnancy Experience. Geneva: World Health Organization, 2016.
2. Trends in maternal mortality 2000 to 2017: estimates by WHO, UNICEF, UNFPA, World Bank Group and the United Nations Population Division. Geneva: World Health Organization; 2019. Licence: CC BY-NC-SA 3.0 IGO.
3. United Nations Inter-agency Group for Child Mortality Estimation (UNIGME) UNCsF. 'Levels & Trends in Child Mortality: Report 2019, Estimates developed by the United Nations Inter-agency Group for Child Mortality Estimation'. New York 2019
4. Hug L, Alexander M, You D, et al. National, regional, and global levels and trends in neonatal mortality between 1990 and 2017, with scenario-based projections to 2030: a systematic analysis. *The Lancet Global health* 2019;7(6):e710-e20. doi: 10.1016/s2214-109x(19)30163-9 [published Online First: 2019/05/18]
5. group TAfMaNHIAms. Population-based rates, timing, and causes of maternal deaths, stillbirths, and neonatal deaths in south Asia and sub-Saharan Africa: a multi-country prospective cohort study. *The Lancet Global health* 2018;6(12):e1297-e308. doi: 10.1016/s2214-109x(18)30385-1 [published Online First: 2018/10/27]
6. WHO. Antenatal Care in Developing Countries Promises, achievements and missed opportunities, An analysis of trends, levels and differentials, 1990-2001. 2003:36.
7. Moller AB, Petzold M, Chou D, et al. Early antenatal care visit: a systematic analysis of regional and global levels and trends of coverage from 1990 to 2013. *The Lancet Global health* 2017;5(10):e977-e83. doi: 10.1016/s2214-109x(17)30325-x [published Online First: 2017/09/16]
8. Tekelab T, Chojenta C, Smith R, et al. Factors affecting utilization of antenatal care in Ethiopia: A systematic review and meta-analysis. *PloS one* 2019;14(4):e0214848. doi: 10.1371/journal.pone.0214848 [published Online First: 2019/04/12]
9. Tekelab T, Chojenta C, Smith R, et al. The impact of antenatal care on neonatal mortality in sub-Saharan Africa: A systematic review and meta-analysis. 2019;14(9):e0222566. doi: 10.1371/journal.pone.0222566
10. Tripathi V, Singh R. Regional differences in usage of antenatal care and safe delivery services in Indonesia: findings from a nationally representative survey. *BMJ open* 2017;7(2):e013408. doi: 10.1136/bmjopen-2016-013408 [published Online First: 2017/02/06]
11. Rosário EVN, Gomes MC, Brito M, et al. Determinants of maternal health care and birth outcome in the Dande Health and Demographic Surveillance System area, Angola. *PloS one* 2019;14(8):e0221280. doi: 10.1371/journal.pone.0221280 [published Online First: 2019/08/23]
12. Aziz Ali S, Ahmed Dero A, Aziz Ali S, et al. Factors affecting the utilization of antenatal care among pregnant women: A literature review. *J Preg Neonatal Med* 2018;2(2):41-45.
13. Ribeiro ER, Guimarães AM, Bettiol H, et al. Risk factors for inadequate prenatal care use in the metropolitan area of Aracaju, Northeast Brazil. *BMC pregnancy and childbirth* 2009;9:31. doi: 10.1186/1471-2393-9-31 [published Online First: 2009/07/23]
14. Nimi T, Fraga S, Costa D, et al. Prenatal care and pregnancy outcomes: A cross-sectional study in Luanda, Angola. *International journal of gynaecology and obstetrics: the official organ of the International Federation of Gynaecology and Obstetrics* 2016;135 Suppl 1:S72-s78. doi: 10.1016/j.ijgo.2016.08.013 [published Online First: 2016/11/12]
15. Guliani H, Sepehri A, Serieux J. Determinants of prenatal care use: evidence from 32 low-income countries across Asia, Sub-Saharan Africa and Latin America. *Health policy and planning* 2014;29(5):589-602. doi: 10.1093/heapol/czt045 [published Online First: 2013/07/31]
16. Titaley CR, Dibley MJ, Roberts CL. Factors associated with underutilization of antenatal care services in Indonesia: results of Indonesia Demographic and Health Survey 2002/2003 and 2007. *BMC public health* 2010;10:485. doi: 10.1186/1471-2458-10-485 [published Online First: 2010/08/18]
17. Simkhada B, Teijlingen ER, Porter M, et al. Factors affecting the utilization of antenatal care in developing countries: systematic review of the literature. *Journal of advanced nursing* 2008;61(3):244-60. doi: 10.1111/j.1365-2648.2007.04532.x [published Online First: 2008/01/17]
18. Aliyu AA, Dahiru T. Predictors of delayed Antenatal Care (ANC) visits in Nigeria: secondary analysis of 2013 Nigeria Demographic and Health Survey (NDHS). *The Pan African medical journal* 2017;26:124. doi: 10.11604/pamj.2017.26.124.9861 [published Online First: 2017/05/24]

19. Tang X, Ding L, Feng Y, et al. Antenatal care use and its determinants among migrant women during the first delivery: a nation-wide cross-sectional study in China. *BMC pregnancy and childbirth* 2019;19(1):355-55. doi: 10.1186/s12884-019-2520-3
20. Sakeah E, Okawa S, Rexford Oduro A, et al. Determinants of attending antenatal care at least four times in rural Ghana: analysis of a cross-sectional survey. *Global health action* 2017;10(1):1291879. doi: 10.1080/16549716.2017.1291879 [published Online First: 2017/06/06]
21. Mekonnen T, Dune T, Perz J, et al. Trends and Determinants of Antenatal Care Service Use in Ethiopia between 2000 and 2016. *International journal of environmental research and public health* 2019;16(5) doi: 10.3390/ijerph16050748 [published Online First: 2019/03/06]
22. Ogbo FA, Dhama MV, Ude EM, et al. Enablers and Barriers to the Utilization of Antenatal Care Services in India. *International journal of environmental research and public health* 2019;16(17) doi: 10.3390/ijerph16173152 [published Online First: 2019/09/01]
23. El-Khatib Z, Kolawole Odusina E, Ghose B, et al. Patterns and Predictors of Insufficient Antenatal Care Utilization in Nigeria over a Decade: A Pooled Data Analysis Using Demographic and Health Surveys. *International journal of environmental research and public health* 2020;17(21) doi: 10.3390/ijerph17218261 [published Online First: 2020/11/14]
24. Asundep NN, Carson AP, Turpin CA, et al. Determinants of access to antenatal care and birth outcomes in Kumasi, Ghana. *Journal of epidemiology and global health* 2013;3(4):279-88. doi: 10.1016/j.jegh.2013.09.004 [published Online First: 2013/11/12]
25. Woldegiorgis MA, Hiller JE, Mekonnen W, et al. Disparities in maternal health services in sub-Saharan Africa. *International journal of public health* 2018;63(4):525-35. doi: 10.1007/s00038-018-1086-6 [published Online First: 2018/03/25]
26. Alam N, Hajizadeh M, Dumont A, et al. Inequalities in maternal health care utilization in sub-Saharan African countries: a multiyear and multi-country analysis. *PloS one* 2015;10(4):e0120922. doi: 10.1371/journal.pone.0120922 [published Online First: 2015/04/09]
27. United Nations (2015). Transforming our world: The 2030 agenda for sustainable development,(2019)(<https://sustainabledevelopment.un.org/SDG>, accessed 28th November,2020.
28. Owolabi OO, Wong KLM, Dennis ML, et al. Comparing the use and content of antenatal care in adolescent and older first-time mothers in 13 countries of west Africa: a cross-sectional analysis of Demographic and Health Surveys. *The Lancet Child & adolescent health* 2017;1(3):203-12. doi: 10.1016/s2352-4642(17)30025-1 [published Online First: 2018/09/01]
29. Corsi DJ, Neuman M, Finlay JE, et al. Demographic and health surveys: a profile. *International journal of epidemiology* 2012;41(6):1602-13. doi: 10.1093/ije/dys184 [published Online First: 2012/11/14]
30. Filmer D, Pritchett LH. Estimating wealth effects without expenditure data--or tears: an application to educational enrollments in states of India. *Demography* 2001;38(1):115-32. doi: 10.1353/dem.2001.0003 [published Online First: 2001/03/03]
31. Woldegiorgis MA, Hiller J, Mekonnen W, et al. Determinants of antenatal care and skilled birth attendance in sub-Saharan Africa: A multilevel analysis. *Health services research* 2019;54(5):1110-18. doi: 10.1111/1475-6773.13163 [published Online First: 2019/05/16]

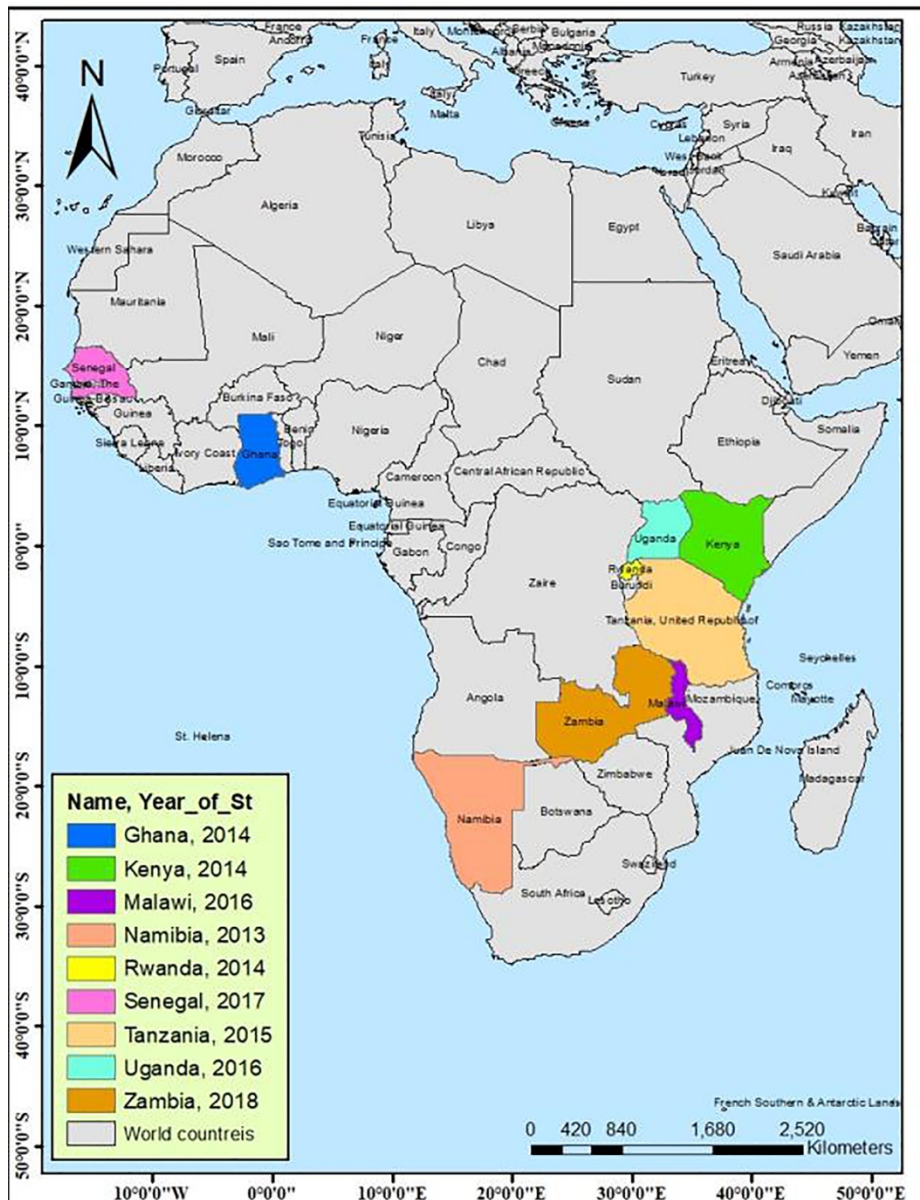

Figure 1. Map of African countries showing the geographical location of the study sites (source: Geographic Coordinate System: GCS\_WGS\_1984, Datum: D\_WGS\_1984, Prime Meridian: Greenwich, Angular Unite: Degree)

163x211mm (300 x 300 DPI)

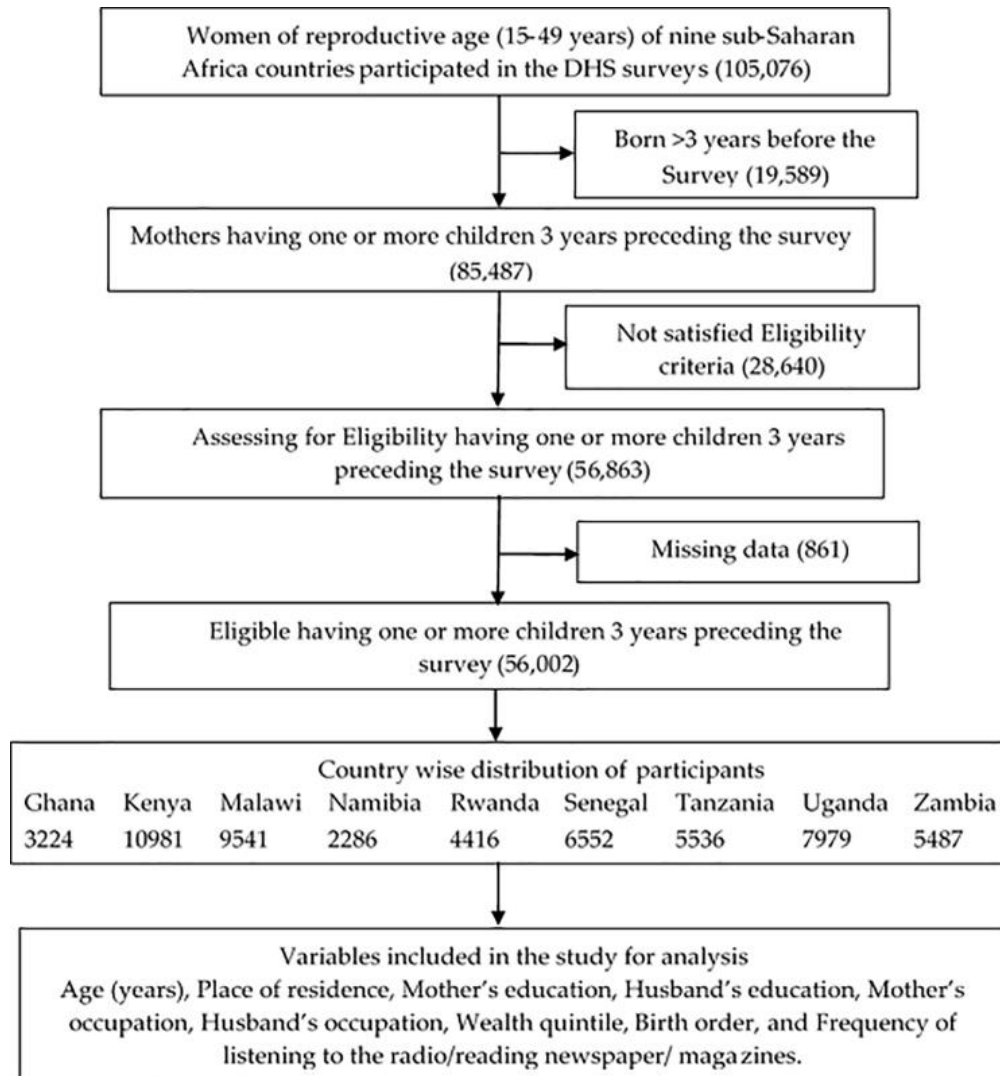

Figure 2: Flow chart of the process of selection of women for analysis of 4+ANC

196x211mm (96 x 96 DPI)



1  
2  
3  
4  
5  
6  
7  
8  
9  
10  
11  
12  
13  
14  
15  
16  
17  
18  
19  
20  
21  
22  
23  
24  
25  
26  
27  
28  
29  
30  
31  
32  
33  
34  
35  
36  
37  
38  
39  
40  
41  
42  
43  
44  
45  
46  
47  
48  
49  
50  
51  
52  
53  
54  
55  
56  
57  
58  
59  
60

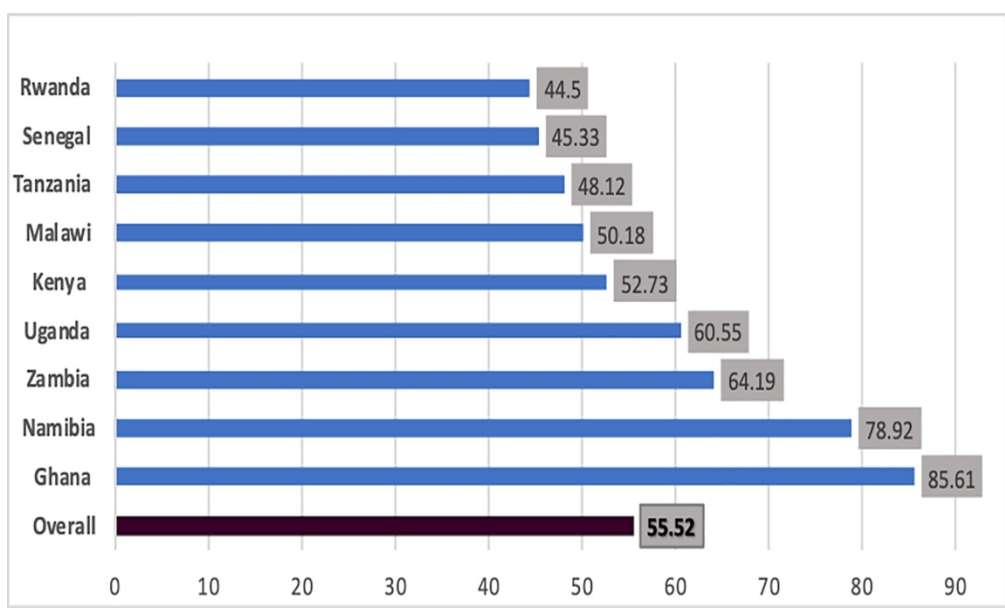

Figure 3. Percentage distribution of 4+Antenatal care visits among women in nine sub-Saharan countries

151x90mm (300 x 300 DPI)

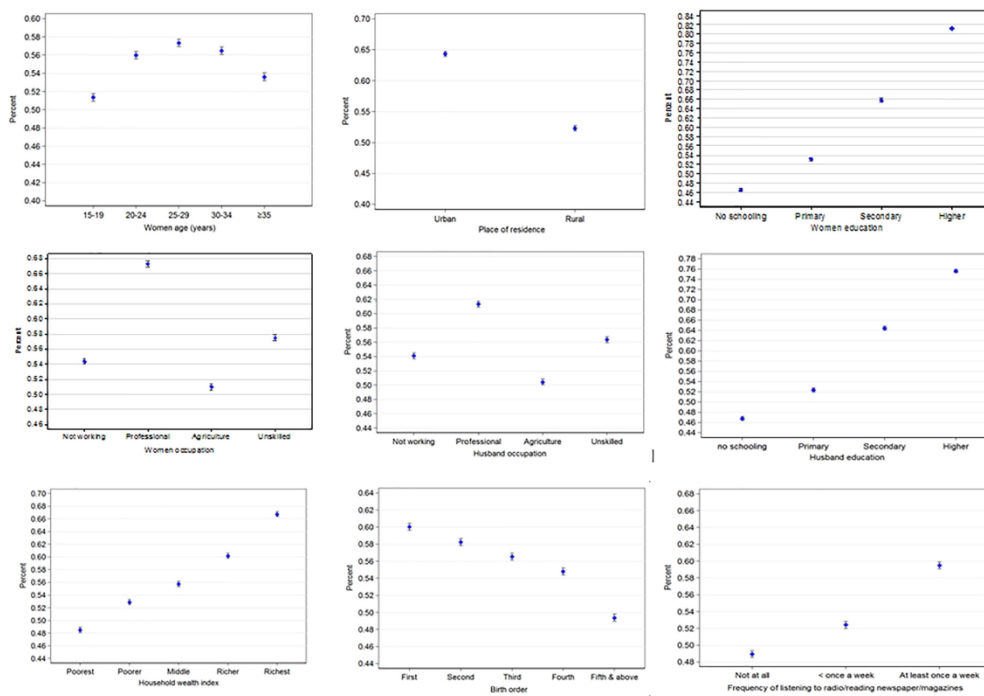

Figure 4. Distribution of 4+ANC visits of study participants, by sociodemographic factors, with 95% confidence interval

251x174mm (300 x 300 DPI)

**Table1. Distribution of study participants for ANC visit by sociodemographic factors**

| Variables                                                              | N     | Percent (%) |
|------------------------------------------------------------------------|-------|-------------|
| <b>Age group</b>                                                       |       |             |
| 15-19                                                                  | 5084  | 9.08        |
| 20-24                                                                  | 14930 | 26.66       |
| 25-29                                                                  | 14168 | 25.30       |
| 30-34                                                                  | 10804 | 19.29       |
| 35 and above                                                           | 11016 | 19.67       |
| <b>Place of residence</b>                                              |       |             |
| Urban                                                                  | 15024 | 26.83       |
| Rural                                                                  | 40978 | 73.17       |
| <b>Women education</b>                                                 |       |             |
| No schooling                                                           | 12589 | 22.48       |
| Primary                                                                | 28673 | 51.20       |
| Secondary                                                              | 12703 | 22.68       |
| Higher                                                                 | 2037  | 3.64        |
| <b>Husband education</b>                                               |       |             |
| no schooling                                                           | 9368  | 22.53       |
| Primary                                                                | 18617 | 44.78       |
| Secondary                                                              | 10968 | 26.38       |
| Higher                                                                 | 2624  | 6.31        |
| <b>Women occupation</b>                                                |       |             |
| Not working outside home                                               | 15820 | 31.48       |
| Professional/Skilled work                                              | 9222  | 18.35       |
| Agriculture                                                            | 18823 | 37.45       |
| Unskilled                                                              | 6392  | 12.72       |
| <b>Husband occupation</b>                                              |       |             |
| Not working outside the home                                           | 1744  | 4.17        |
| Professional/Skilled work                                              | 14721 | 35.22       |
| Agriculture                                                            | 16758 | 40.09       |
| Unskilled                                                              | 8579  | 20.52       |
| <b>Wealth quintile</b>                                                 |       |             |
| Poorest                                                                | 15283 | 27.29       |
| Poorer                                                                 | 12308 | 21.98       |
| Middle                                                                 | 10560 | 18.86       |
| Richer                                                                 | 9452  | 16.88       |
| Richest                                                                | 8399  | 15.00       |
| <b>Birth order</b>                                                     |       |             |
| First                                                                  | 13434 | 23.99       |
| Second                                                                 | 11333 | 20.24       |
| Third                                                                  | 8927  | 15.94       |
| Fourth                                                                 | 6901  | 12.32       |
| Fifth & above                                                          | 15407 | 27.51       |
| <b>Frequency of listening to the radio/reading newspaper/magazines</b> |       |             |
| Not at all                                                             | 14976 | 27.54       |
| Less than once a week                                                  | 10184 | 18.73       |
| At least once a week                                                   | 29213 | 53.73       |

# BMJ Open

## Determinants of Antenatal care use in nine sub-Saharan Africa countries: evidence from cross-sectional study of Demographic and Health Surveys

|                                 |                                                                                                                                                                                                                                                                                                                                                                                                                                                                                                                              |
|---------------------------------|------------------------------------------------------------------------------------------------------------------------------------------------------------------------------------------------------------------------------------------------------------------------------------------------------------------------------------------------------------------------------------------------------------------------------------------------------------------------------------------------------------------------------|
| Journal:                        | <i>BMJ Open</i>                                                                                                                                                                                                                                                                                                                                                                                                                                                                                                              |
| Manuscript ID                   | bmjopen-2021-051675.R1                                                                                                                                                                                                                                                                                                                                                                                                                                                                                                       |
| Article Type:                   | Original research                                                                                                                                                                                                                                                                                                                                                                                                                                                                                                            |
| Date Submitted by the Author:   | 24-Nov-2021                                                                                                                                                                                                                                                                                                                                                                                                                                                                                                                  |
| Complete List of Authors:       | Andegiorgish, Amanuel; Xi'an Jiaotong University, Department of Epidemiology & Biostatistics; Asmara College of Health Sciences, Epidemiology & Biostatistics<br>ELHOUMED, Mohamed; Xi'an Jiaotong University, Department of Epidemiology and Biostatistics<br>Qi, Qi; Xi'an Jiaotong University, Department of Epidemiology and Biostatistics<br>Zhu, Zhonghai; Xi'an Jiaotong University, Department of Epidemiology and Biostatistics<br>Zeng, L; Xi'an Jiaotong University, Department of Epidemiology and Biostatistics |
| <b>Primary Subject Heading</b>: | Epidemiology                                                                                                                                                                                                                                                                                                                                                                                                                                                                                                                 |
| Secondary Subject Heading:      | Health policy, Epidemiology, Public health                                                                                                                                                                                                                                                                                                                                                                                                                                                                                   |
| Keywords:                       | Health policy < HEALTH SERVICES ADMINISTRATION & MANAGEMENT, Community child health < PAEDIATRICS, Prenatal diagnosis < OBSTETRICS, EPIDEMIOLOGY                                                                                                                                                                                                                                                                                                                                                                             |
|                                 |                                                                                                                                                                                                                                                                                                                                                                                                                                                                                                                              |

SCHOLARONE™  
Manuscripts



I, the Submitting Author has the right to grant and does grant on behalf of all authors of the Work (as defined in the below author licence), an exclusive licence and/or a non-exclusive licence for contributions from authors who are: i) UK Crown employees; ii) where BMJ has agreed a CC-BY licence shall apply, and/or iii) in accordance with the terms applicable for US Federal Government officers or employees acting as part of their official duties; on a worldwide, perpetual, irrevocable, royalty-free basis to BMJ Publishing Group Ltd ("BMJ") its licensees and where the relevant Journal is co-owned by BMJ to the co-owners of the Journal, to publish the Work in this journal and any other BMJ products and to exploit all rights, as set out in our [licence](#).

The Submitting Author accepts and understands that any supply made under these terms is made by BMJ to the Submitting Author unless you are acting as an employee on behalf of your employer or a postgraduate student of an affiliated institution which is paying any applicable article publishing charge ("APC") for Open Access articles. Where the Submitting Author wishes to make the Work available on an Open Access basis (and intends to pay the relevant APC), the terms of reuse of such Open Access shall be governed by a Creative Commons licence – details of these licences and which [Creative Commons](#) licence will apply to this Work are set out in our licence referred to above.

Other than as permitted in any relevant BMJ Author's Self Archiving Policies, I confirm this Work has not been accepted for publication elsewhere, is not being considered for publication elsewhere and does not duplicate material already published. I confirm all authors consent to publication of this Work and authorise the granting of this licence.

1  
2  
3 **Determinants of Antenatal care use in nine sub-Saharan Africa countries:**  
4  
5 **evidence from cross-sectional study of Demographic and Health Surveys**  
6  
7

8 **Amanuel kidane Andegiorgish**<sup>1,2</sup>, **Mohamed Elhoumed**<sup>1,3</sup>, **Qi Qi**<sup>1</sup>, **Zhonghai**  
9 **Zhu**<sup>1</sup> and **Lingxia Zeng**<sup>1</sup> \*

10  
11  
12  
13 <sup>1</sup> Department of Epidemiology and Biostatistics, School of Public Health, Xi'an  
14 Jiaotong University Health Science Center, No 76 West Yanta Road, Xi'an  
15  
16 710061, Shaanxi Province, People's Republic of China  
17

18  
19  
20 <sup>2</sup> Department of Epidemiology and Biostatistics, Asmara College of Health  
21 Sciences, School of Public Health, P.O.Box 8566, Asmara, Eritrea  
22

23  
24  
25 <sup>3</sup> National Institute of Public Health Research (INRSP), BP. 695, Nouakchott,  
26 Mauritania  
27

28  
29 \* Correspondence: Lingxia Zeng; [tjzlx@mail.xjtu.edu.cn](mailto:tjzlx@mail.xjtu.edu.cn)  
30  
31

32  
33 **Abstract:**

34  
35  
36 **Objective:** Literature on determinants of antenatal care visits in sub-Saharan Africa  
37 remains limited. The aim of this study is to explore the factors associated with  
38 antenatal care visits.  
39

40  
41 **Design:** A secondary data analysis from cross-sectional studies was conducted.

42  
43 **Setting:** Sub-Saharan Africa (SSA)

44  
45 **Participants:** 56002 women aged 15-49 years who gave birth three years preceding  
46 the survey (2013-2019) from Ghana, Kenya, Malawi, Namibia, Rwanda, Senegal,  
47 Tanzania, Uganda, and Zambia were analyzed.  
48

49  
50 **Outcomes:** Four or more antenatal care (4+ANC) visits

51  
52 **Results:** Overall 55.52% (95% CI: 55.11 to 55.93) of women had 4+ANC visits.  
53 The highest and lowest 4+ANC visits were from Ghana (85.6%) and Rwanda  
54 (44.5%). Women 15-19 years from Ghana, Kenya, Malawi, Senegal, and Namibia  
55 had lower 4+ANC visits. Multivariable analysis showed that the odds of 4+ANC  
56 visits were 14% lower among rural women (AOR:0.86;95% CI: 0.81 to 0.91) and  
57 this difference was significant in Kenya, Malawi, and Senegal. Unlike other  
58 countries, this was 48% higher (AOR:1.48;95% CI: 1.2 to 1.82) among rural women  
59 in Zambia. Women with higher educational levels had more than two-fold higher  
60

odds of 4+ANC visits in seven countries, and it was significant in Kenya, Malawi, Rwanda, and Zambia. Compared to the poorest households, odds of 4+ANC visits increased by 12 % (AOR:1.12;95% CI: 1.06 to 1.19), 18% (AOR:1.18; 95% CI: 1.11 to 1.26), 32% (AOR:1.32; 95% CI: 1.23 to 1.42), and 41% (AOR:1.41,95% CI 1.29 to 1.55) for every 20% variation on the wealth quantile. First-time pregnancy and access to media at least once a week were associated with 4+ANC visits.

**Conclusion:** Despite its importance, ANC service utilization was low among women of the SSA countries. Therefore, regional and country-specific maternal health programs focused on women of rural resident, no schooled, no outside-home occupation, low-economic status, non-first-time pregnancy, and no access to media are required.

**Keywords:** Four or more antenatal care, Determinants, sub-Saharan Africa, Demographic health survey, and health service utilization.

### Strengths and limitations of this study

- The analytical approach both as pooled data support the outcome to be valid and the merit in segregating data allows to focus on aspects of ANC visits that may remain hidden in intra-national/national level indicators
- The study used national representative samples from nine sub-Saharan Africa countries which have been linked to enhance the generalizability of the study
- This analysis included women who have birth three years before the survey, which could minimize the recall bias of self-report at a single point in time
- The cross-sectional nature of the study design cannot affirm the cause-effect or direction of association of the predictors.
- Since the data sets were obtained from countries DHS in a different time, awareness of participants may be varied due to time heterogeneity

### Introduction

Maternal and neonatal mortality which remains unacceptably high is a significant public health issues that reflect the overall status of a country's healthcare system and socioeconomic development<sup>1</sup>. The world health organization (WHO) estimates that approximately 830 maternal deaths/day from preventable causes relate to pregnancy and childbirth, and 99% of these deaths occur in low-income countries <sup>2</sup>. Sub-Saharan Africa (SSA) remains the region with the highest maternal and under-five mortality <sup>3-5</sup>. Almost half of the under-five deaths occur among new-born babies whose deaths could be prevented by reaching a high coverage of quality antenatal care, skilled care

1  
2  
3 at birth, postnatal care for mother and baby, and care of small and sick new-born <sup>3 4</sup>.  
4  
5 Several review studies on intervention for maternal and new-born life have  
6  
7 demonstrated that the provision of adequate antenatal care (ANC) brings with it a  
8  
9 positive impact on pregnancy outcomes through early diagnosis and appropriate  
10  
11 management and this has a 39% reduced risk of neonatal mortality in sub-Saharan  
12  
13 countries <sup>6-9</sup>.  
14  
15

16  
17 The WHO advises every pregnant woman with a normal pregnancy in middle-  
18  
19 and low-income countries to attend at least four ANCs <sup>1</sup>. However, many women in  
20  
21 low income countries particularly in SSA have limited access <sup>10</sup>. Several studies have  
22  
23 attempted to identify factors associated with the underutilization of ANC's <sup>11 12</sup>. Age  
24  
25 12-16, women's education <sup>8 12-24</sup>, husbands' education <sup>18 22 23</sup>, socioeconomic status <sup>14-23</sup>  
26  
27 <sup>25</sup>, women's employment <sup>18</sup>, birth order <sup>11 12 18</sup>, frequency of listening to the  
28  
29 radio/watching TV/reading newspaper/ magazines <sup>8 11 18 23 24</sup>, and place of residence <sup>12</sup>  
30  
31 <sup>13 16-19 22 24 25</sup> are among the most identified factors associated with underutilization of  
32  
33 ANC. Evidence shows that the factors attributed to inadequate ANC follow-ups are  
34  
35 quite substantial across regions and countries <sup>11 16 23 26 27</sup>.  
36  
37  
38  
39

40 Meeting SDGs to ensure healthy lives and well-being for all ages by 2030  
41  
42 requires transnational organizations' efforts and the ability to collaborate in  
43  
44 partnership. Interestingly the means of implementing and revitalizing capacity  
45  
46 development and the information exchange of multinational cooperation have been  
47  
48 emphasized in the SDGs <sup>28</sup>. Despite the available evidence on ANC's key role in  
49  
50 reducing maternal and neonatal mortality, millions of women in developing countries  
51  
52 do not receive it and there remains a high variability (32%-91%) of four or more  
53  
54 ANC (4+ANC ) visits between countries <sup>21 22 24 29</sup>. Lessons on coverage of crucial  
55  
56 ANCs from neighboring areas would aid in precise allocations of resources and  
57  
58  
59  
60



1  
2  
3 interventions where they are most needed. Therefore, new research projects on mutual  
4 benefit and knowledge sharing at every level must be implemented to attain global  
5 health development goals.  
6  
7  
8  
9

10 We conducted secondary data analysis using the latest (2013-2019) standard  
11 Demographic health survey conducted in nine sub-Saharan Africa countries (Ghana,  
12 Kenya, Malawi, Namibia, Senegal, Rwanda, Tanzania, Uganda, and Zambia). The  
13 objective of the study was to understand the factors associated with 4<sup>+</sup>ANC  
14 attendance.  
15  
16  
17  
18  
19  
20  
21

## 22 **Materials and Methods**

### 23 **Study design**

24  
25  
26 We used data from the Demographic and Health Survey (DHS). DHS is a five-  
27 year periodic national representative cross-sectional study using a stratified two-stage  
28 cluster sampling design. Details of the DHS protocol are published elsewhere <sup>30</sup>.  
29 Information from ever-married women aged 15-49 years in nine sub-Sahara Africa  
30 countries on demographic characteristics and reproductive history were collected.  
31  
32  
33  
34  
35  
36  
37  
38  
39

40 The nine countries included in this analysis and their year of survey are; Ghana  
41 (DHS 2014), Kenya (DHS 2014) Malawi (DHS 2015/2016), Namibia (DHS 2013),  
42 Rwanda (DHS 2014/2015) Senegal (DHS 2017), Tanzania (DHS 2015/2016), Uganda  
43 (DHS 2016) and Zambia (DHS 2018/2019). Countries were selected based on the  
44 availability of recent standard DHS data after 2010 and representing the four different  
45 sub-regions of the Sub-Saharan Africa, i.e. Western, Central, Southern, and Eastern  
46 Africa.  
47  
48  
49  
50  
51  
52  
53  
54  
55  
56

### 57 **Data sources/ measurements**

1  
2  
3 Data sets were collected through household interviews using a structured  
4 questionnaire. Women were interviewed about the number of ANC visits. Trained  
5 interviewers obtained informed consent from all eligible women in selected  
6 households before conducting the interview using pencil and paper questionnaires.  
7  
8 The surveys are weighted for over or under-sampling and non-response. Thus, the  
9 design and standardized core modules allow for regional and transnational  
10 comparison of the data. Field supervisors and data clerks checked all forms before  
11 entering them into databases. Data for this analysis was taken from the latest  
12 household survey of the studied countries. This study's survey years ranged from 2013  
13 to 2019, and the sample size ranges from 2,286 in Namibia to 10,981 in Kenya.  
14  
15  
16  
17  
18  
19  
20  
21  
22  
23  
24  
25  
26

## 27 **Participants**

28  
29  
30 Women who had one or more births three years before the survey were included  
31 as study participants. Selection criteria of study participants was as shown in (Figure-  
32 1). In the DHS survey, information about antenatal care is only collected for the  
33 youngest child under-five years. Therefore, to minimize the degree of error due to  
34 recall bias we have limited our analysis to those births happened three years before  
35 the survey. Overall and country wise contribution of study participants is presented in  
36 Figure 1.  
37  
38  
39  
40  
41  
42  
43  
44  
45

## 46 **Exclusion criteria**

47  
48 ANC provided by non-health professionals such as traditional birth attendants  
49 were excluded from the present analysis.  
50  
51  
52

## 53 **Outcome variable**

54  
55 We used antenatal care visits as our primary outcome. We categorized this  
56 variable in to binary as 4<sup>+</sup>ANC visits (yes= if the mother had at least four ANC visits)  
57  
58  
59  
60

1  
2  
3 and (no= if the mother had less than four ANC visits) during the last pregnancy three  
4  
5 years before the survey.  
6  
7

### 8 **Explanatory variables**

9  
10 A set of sociodemographic variables related to the utilization of ANC such as  
11 women's age in years, women and husbands education and occupation, birth order  
12 (parity), frequency of listening to radio/ watching TV/ reading magazines, household  
13 wealth quantile, and place of residence were identified from the survey data as  
14 predictors of ANC follow-ups. Numerical values like age, ANC visits, and years of  
15 education attended were grouped into categories. Women's age in years was  
16 tabulated into groups (15-19-year, 20-24-year, 25-29-year, 30-34 year, 35 and above),  
17 women's and husbands' education were classified as 'no schooling', 'primary',  
18 'secondary', and 'higher' education. Women's and husband's occupation were  
19 classified as 'not working outside home', 'professional/skilled work', 'agriculture',  
20 and 'unskilled'. Frequency of listening to radio/ watching TV/ reading magazines (not  
21 at all, less than once a week, and at least once a week) was included to gauge the  
22 women's exposure to promotion messages on the benefits of ANC attendance. The  
23 household wealth index was constructed using a principal component analysis method  
24 from items related to possession of durable assets, access to utilities and  
25 infrastructure, and housing characteristics to assess the women's economic status.  
26 Each woman was ranked into five categories (poorest, poorer, middle, richer, and  
27 richest) based on a household asset score, comprising 20% of the population <sup>11 31</sup>.  
28 Place of residence/ ecological status assessed the difference in the availability and  
29 accessibility of services among urban and rural and were identified from the survey  
30 data as predictors of ANC follow-ups.  
31  
32  
33  
34  
35  
36  
37  
38  
39  
40  
41  
42  
43  
44  
45  
46  
47  
48  
49  
50  
51  
52  
53  
54  
55  
56  
57  
58  
59  
60

## Data analysis

Data analysis was performed using STATA software version 14.0. Descriptive analysis was conducted on combined and separate forms for the studied country using weight, clustering, and stratification variables provided by the DHS, using the svyset command, to account for the study design. Chi-square tests were used to analyze the potential factors affecting ANC use during their last pregnancy three years before the survey. Bivariate and multivariable regressions were used to study the statistical association between the explanatory variables and 4<sup>+</sup>ANC. A multilevel analysis was used in which the level of coefficients was modeled as a function of predictors considering the average log odds of 4<sup>+</sup>ANC across the studied countries. Women's age at childbirth and husband's occupation were excluded from the multilevel analysis due to collinearity effects with a variance inflation factor value (VIF>4) on the collinearity diagnosis test. A two-sided P-value <0.05 was considered statistically significant in this study.

## Patient and public involvement

The study used publicly available secondary data from DHS. Patients and public were not involved in the design and conduct of this research

## Results

### Baseline characteristics of the study population

A total of 56,002 women with complete details from nine SSA countries were included in this study. The distribution of study participants was presented in flowchart Figure 1. Sixty one percent of the participant women were less than 30 years old and about three-fourth (73.2%) of the total participant were from rural place of residence. Rate of illiteracy in the studied countries was high with more than one-fifth (22.5%) of all women and husband had not attended any schooling. More women

1  
2  
3 (51.2%) had primary level of education than husbands (44.8%), while women  
4 unemployment status (no working outside home) was higher than husband's (31.5%  
5 vs 4.2%). More than one-fourth (27.3%) of all the studied households were in the  
6 lowest (poorest) wealth quantiles and 24% of the participant women were first birth  
7 order (primigravidae) (Table 1).  
8  
9

10 Overall, 55.52% (95% CI; 55.11 to 55.93) of the women in the nine SSA  
11 countries had at least four ANC visits with skilled health provider during pregnancy.  
12 Thirty-five percent of the participated women started their first ANC visit in the 1<sup>st</sup>  
13 trimester and 57% in the 2<sup>nd</sup> trimester of pregnancy. Before pregnancy, 82.2% of  
14 women in this study had received a tetanus injection. There were 1,808 deaths (32.3  
15 deaths/ 1000 live births) among new-born three years preceding the survey.  
16  
17

18 The highest proportion of 4<sup>+</sup>ANC visits among the studied countries was from  
19 Ghana (85.61%) followed by Namibia (78.92%), and Zambia (64.2%), and the lowest  
20 proportion was from Rwanda (44.5%), Senegal (45.3%), and Tanzania (48.1%)  
21 (Figure 2 online).  
22  
23

24 Pooled data (Figure 3) illustrates that the highest proportion (57.3%) of 4<sup>+</sup>ANC  
25 visits was among 25-29 years old women. Women from an urban place of residence  
26 account for 64.3% of 4<sup>+</sup>ANC visits. There was an increased proportion of 4<sup>+</sup>ANC  
27 visits with an increasing women educational level, husbands educational level,  
28 household wealth status, and access to radio listening / watching TV/ reading  
29 newspapers or magazine. Proportion of 4<sup>+</sup>ANC visits decreased with an increase in  
30 birth order. There was no clear pattern in the association of 4<sup>+</sup>ANC visits on women  
31 and husband occupation levels, albeit professional in both groups were higher.  
32  
33

### 34 **Determinants of four or more antenatal care visits**

35  
36  
37  
38  
39  
40  
41  
42  
43  
44  
45  
46  
47  
48  
49  
50  
51  
52  
53  
54  
55  
56  
57  
58  
59  
60

1  
2  
3 Table 1 describes that women aged 25-29 years attended more ANC across all the  
4 studied countries and the difference was statistically significant ( $p < 0.005$ ) except in  
5 Zambia ( $p = 0.361$ ). Similarly, women from an urban place of residence had  
6 meaningful ( $p < 0.001$ ) higher ANC visits than women from rural place of residence  
7 except in Rwanda ( $p = 0.788$ ). In Zambia women from rural place of residence had  
8 higher 4+ANC visits ( $p < 0.001$ ). Table 1 shows that higher women's and husbands'  
9 education level significantly ( $p < 0.001$ ) increased women utilization of ANC across all  
10 the studied countries. The highest 4+ANC attendance was among women and  
11 husbands with highest educational level in Ghana, 99.2% and 96.4% respectively, and  
12 the lowest was among women of no schooling in Rwanda (37.6%) and Tanzania  
13 (38.6%), and husbands no schooling in Tanzania (36.3%).

14  
15  
16  
17  
18  
19  
20  
21  
22  
23  
24  
25  
26  
27  
28  
29  
30  
31  
32  
33  
34  
35  
36  
37  
38  
39  
40  
41  
42  
43  
44  
45  
46  
47  
48  
49  
50  
51  
52  
53  
54  
55  
56  
57  
58  
59  
60  
Occupational status of women and husband was associated ( $p < 0.001$ ) with  
women's 4+ANC attendance across all countries except in Rwanda ( $p = 0.493$ ) and  
Zambia ( $p = 0.062$ ) where husband's occupation had no association with women's  
4+ANC visits.

In this study, household wealth status (wealth quantile) had a significant  
association ( $p < 0.001$ ) with 4+ANC visits. As the household wealth status increases,  
the usage of 4+ANC visits increase across all countries except in Rwanda ( $p = 0.234$ ).  
Most women of first pregnancy had received more ANCs, and the difference was  
significant ( $p < 0.001$ ) except in Malawi ( $p = 0.383$ ).

More than one in four (27.54) of the participant women had no access to radio  
listening / watching TV/ reading newspapers or magazine and 53% had access at least  
once a week. However, women who had access to radio listening / watching TV/  
reading newspapers or magazine had significant higher 4+ANC attendance in the  
studied countries ( $p < 0.001$ ), except in Rwanda ( $p = 0.147$ ) and Zambia ( $p = 0.264$ ).

Table 1. Sociodemographic characteristics influencing 4<sup>+</sup>ANC visits in nine sub-Saharan Africa countries.

| Variables                 | N (%)        | Ghana       | Kenya       | Malawi      | Namibia     | Rwanda      | Senegal     | Tanzania    | Uganda      | Zambia      |
|---------------------------|--------------|-------------|-------------|-------------|-------------|-------------|-------------|-------------|-------------|-------------|
|                           |              | 3,224       | 10,981      | 9,541       | 2,286       | 4,416       | 6,552       | 5,536       | 7,979       | 5,487       |
| Age group                 |              |             |             |             |             |             |             |             |             |             |
| 15-19                     | 5084(9.08)   | 140(79.1)   | 399(47.11)  | 470(43.93)  | 153(66.81)  | 59(40.14)   | 232(40.00)  | 252(47.10)  | 475(58.93)  | 430(62.05)  |
| 20-24                     | 14930(26.66) | 519(84.12)  | 1547(54.05) | 1461(48.62) | 487(78.30)  | 427(45.77)  | 743(47.08)  | 718(49.42)  | 1466(62.30) | 989(65.63)  |
| 25-29                     | 14168(25.30) | 722(87.73)  | 1782(55.02) | 1115(52.01) | 463(81.66)  | 597(47.76)  | 791(46.67)  | 659(50.89)  | 1213(62.78) | 779(63.70)  |
| 30-34                     | 10804(19.29) | 636(86.53)  | 1080(52.81) | 902(52.78)  | 334(82.47)  | 483(43.59)  | 595(46.09)  | 491(48.76)  | 924(61.52)  | 656(65.74)  |
| 35 and above              | 11016(19.67) | 743(85.21)  | 982(49.40)  | 840(52.08)  | 367(79.27)  | 399(40.80)  | 609(43.25)  | 544(43.66)  | 753(54.33)  | 668(62.90)  |
| p-value                   |              | 0.029       | < 0.001     | < 0.001     | < 0.001     | 0.012       | 0.014       | 0.004       | < 0.001     | 0.361       |
| Place of residence        |              |             |             |             |             |             |             |             |             |             |
| Urban                     | 15024(26.83) | 1207(91.72) | 2228(61.28) | 892(57.92)  | 853(82.66)  | 442(44.87)  | 1188(60.00) | 816(60.53)  | 1009(67.90) | 1028(60.44) |
| Rural                     | 40978(73.17) | 1553(81.39) | 3562(48.50) | 3896(48.69) | 951(75.84)  | 1523(44.39) | 1782(38.98) | 1848(44.13) | 3822(58.86) | 2494(65.87) |
| p-value                   |              | < 0.001     | < 0.001     | < 0.001     | < 0.001     | 0.788       | < 0.001     | < 0.001     | < 0.001     | < 0.001     |
| Women's education         |              |             |             |             |             |             |             |             |             |             |
| No schooling              | 12589(22.48) | 846(79.21)  | 916(40.75)  | 494(45.78)  | 106(58.56)  | 228(37.62)  | 1982(41.28) | 421(38.62)  | 535(55.15)  | 325(59.52)  |
| Primary                   | 28673(51.20) | 544(82.42)  | 2884(50.67) | 3124(49.15) | 367(71.40)  | 1397(44.53) | 677(54.51)  | 1557(46.91) | 2872(58.18) | 1807(64.15) |
| Secondary                 | 12703(22.68) | 1242(90.86) | 1380(60.50) | 1038(53.73) | 1229(82.82) | 257(45.73)  | 291(60.00)  | 643(59.76)  | 1072(66.46) | 1206(63.37) |
| Higher                    | 2037(3.64)   | 128(99.22)  | 610(80.26)  | 132(75.86)  | 102(95.33)  | 83(74.77)   | 20(83.33)   | 43(84.31)   | 352(76.52)  | 184(83.26)  |
| p-value                   |              | < 0.001     | < 0.001     | < 0.001     | < 0.001     | < 0.001     | < 0.001     | < 0.001     | < 0.001     | < 0.001     |
| Husband's education       |              |             |             |             |             |             |             |             |             |             |
| No schooling              | 9368(22.53)  | 699(79.16)  | 344(40.23)  | 348(48.07)  | 123(65.78)  | 248(40.52)  | 1900(40.85) | 234(36.34)  | 324(58.70)  | 161(61.92)  |
| Primary                   | 18618(44.78) | 292(83.67)  | 1172(51.38) | 2068(48.72) | 174(73.73)  | 1267(45.66) | 362(55.69)  | 1341(45.66) | 2057(57.54) | 1008(64.24) |
| Secondary                 | 10968(26.38) | 1245(88.61) | 727(60.43)  | 1314(52.86) | 522(82.08)  | 172(44.33)  | 273(62.19)  | 521(59.68)  | 1114(65.38) | 1174(64.01) |
| Higher                    | 2624(6.31)   | 267(96.39)  | 347(73.83)  | 252(67.56)  | 83(96.51)   | 95(62.91)   | 84(68.29)   | 75(69.44)   | 508(73.62)  | 272(78.61)  |
| p-value                   |              | < 0.001     | < 0.001     | < 0.001     | < 0.001     | < 0.001     | < 0.001     | < 0.001     | < 0.001     | < 0.001     |
| Women's occupation        |              |             |             |             |             |             |             |             |             |             |
| Not working O/H           | 15820(31.48) | 519(81.99)  | 1012(50.40) | 1457(48.47) | 969(74.65)  | 130(40.12)  | 1654(45.23) | 543(52.92)  | 760(56.55)  | 1560(61.81) |
| Professional/Skilled work | 9222(18.35)  | 1375(91.18) | 305(70.28)  | 579(55.94)  | 558(84.67)  | 336(49.19)  | 656(52.27)  | 261(65.91)  | 1468(64.84) | 668(67.61)  |
| Agriculture               | 18823(37.45) | 786(78.52)  | 632(49.11)  | 2031(49.61) | 40(86.96)   | 1428(44.47) | 377(33.87)  | 1247(41.58) | 2099(57.90) | 965(66.69)  |
| Unskilled                 | 6392(12.72)  | 73(97.33)   | 859(56.03)  | 721(51.28)  | 233(83.51)  | 71(36.04)   | 279(53.55)  | 613(54.98)  | 498(67.30)  | 328(62.36)  |
| p-value                   |              | < 0.001     | < 0.001     | < 0.001     | < 0.001     | 0.003       | < 0.001     | < 0.001     | < 0.001     | 0.001       |
| Husband's occupation      |              |             |             |             |             |             |             |             |             |             |
| Not working O/H           | 1744(4.17)   | -           | 44(51.76)   | 380(49.74)  | 8(88.89)    | 12(50.00)   | 82(49.70)   | 16(38.10)   | 134(59.03)  | 267(62.38)  |
| Professional/Skilled work | 14721(35.22) | 1024(92.42) | 777(62.26)  | 1241(53.84) | 459(83.91)  | 516(45.03)  | 1412(51.22) | 600(57.58)  | 2091(65.53) | 905(65.72)  |
| Agriculture               | 16758(40.09) | 1065(78.54) | 556(44.91)  | 1446(49.25) | 117(68.02)  | 1082(46.16) | 726(34.00)  | 1096(41.66) | 1327(55.36) | 1033(66.09) |
| Unskilled                 | 8579(20.52)  | 433(91.54)  | 1199(54.01) | 920(49.78)  | 180(81.45)  | 180(42.35)  | 445(48.74)  | 467(54.75)  | 521(62.40)  | 488(61.69)  |
| p-value                   |              | < 0.001     | 0.006       | < 0.001     | < 0.001     | 0.493       | < 0.001     | < 0.001     | < 0.001     | 0.062       |
| Wealth quintile           |              |             |             |             |             |             |             |             |             |             |
| Poorest                   | 15283(27.29) | 817(78.78)  | 1532(41.79) | 1002(46.32) | 369(73.51)  | 444(41.73)  | 634(31.51)  | 457(37.71)  | 1152(54.78) | 1003(65.13) |
| Poorer                    | 12308(21.98) | 577(81.96)  | 1130(49.71) | 1022(48.83) | 351(74.05)  | 409(45.14)  | 706(40.88)  | 450(40.50)  | 1020(58.42) | 842(66.09)  |
| Middle                    | 10560(18.86) | 495(86.09)  | 1011(55.10) | 888(48.05)  | 388(79.51)  | 377(46.60)  | 660(49.14)  | 481(44.87)  | 893(60.13)  | 692(62.62)  |

|                                                                             |                       |              |             |             |             |             |             |             |             |             |             |
|-----------------------------------------------------------------------------|-----------------------|--------------|-------------|-------------|-------------|-------------|-------------|-------------|-------------|-------------|-------------|
|                                                                             | Richer                | 9452(16.88)  | 474(94.23)  | 1007(60.55) | 887(50.63)  | 401(82.51)  | 355(45.87)  | 561(61.58)  | 666(55.64)  | 863(64.26)  | 473(57.47)  |
|                                                                             | Richest               | 8399(15.00)  | 397(98.02)  | 1110(71.15) | 989(58.69)  | 295(87.80)  | 380(44.03)  | 409(73.17)  | 610(64.62)  | 903(69.35)  | 512(68.72)  |
|                                                                             | p-value               |              | < 0.001     | < 0.001     | < 0.001     | < 0.001     | 0.234       | < 0.001     | < 0.001     | < 0.001     | < 0.001     |
| Birth order                                                                 | First                 | 13434(23.99) | 636(87.60)  | 1471(59.80) | 1267(51.23) | 594(79.41)  | 613(50.16)  | 718(52.33)  | 766(56.70)  | 1077(63.73) | 918(65.95)  |
|                                                                             | Second                | 11333(20.24) | 584(89.30)  | 1345(57.45) | 941(48.26)  | 469(81.42)  | 502(46.83)  | 585(50.39)  | 538(51.88)  | 95363.87)   | 684(65.14)  |
|                                                                             | Third                 | 8927(15.94)  | 470(85.77)  | 1019(54.40) | 798(50.41)  | 309(84.43)  | 322(45.61)  | 448(45.16)  | 395(48.59)  | 762(62.56)  | 523(63.16)  |
|                                                                             | Fourth                | 6901(12.32)  | 382(88.22)  | 710(50.25)  | 621(50.74)  | 180(79.92)  | 193(38.14)  | 367(44.48)  | 299(46.00)  | 583(61.50)  | 446(66.77)  |
|                                                                             | Fifth & above         | 15407(27.51) | 688(79.72)  | 1245(43.02) | 1161(50.24) | 252(69.61)  | 335(36.81)  | 852(38.69)  | 666(39.53)  | 1456(55.34) | 951(61.39)  |
|                                                                             | p-value               |              | < 0.001     | < 0.001     | 0.383       | < 0.001     | 0.001       | < 0.001     | < 0.001     | < 0.001     | 0.043       |
| Frequency of listening to radio/ watching TV/ reading newspaper or magazine | Not at all            | 14976(27.54) | 288(70.07)  | 1044(39.77) | 2127(47.85) | 178(62.24)  | 298(42.63)  | 308(34.00)  | 394(37.60)  | 1051(53.54) | 1640(63.25) |
|                                                                             | Less than once a week | 10184(18.73) | 646(81.46)  | 671(51.14)  | 829(49.11)  | 355(76.84)  | 481(42.87)  | 442(37.91)  | 836(44.83)  | 724(59.69)  | 352(62.52)  |
|                                                                             | At least once a week  | 29213(53.73) | 1826(90.40) | 4074(57.84) | 1832(53.76) | 1271(82.75) | 1184(45.75) | 2220(49.55) | 1434(54.67) | 3056(63.63) | 473(66.25)  |
|                                                                             | p-value               |              | < 0.001     | < 0.001     | < 0.001     | < 0.001     | 0.147       | < 0.001     | < 0.001     | < 0.001     | 0.264       |

### Univariate analysis magnitude (*ORs and 95% CI*) of sociodemographic characteristics for 4<sup>+</sup>ANC visits

Table 2 presents the results of univariate analysis of 4<sup>+</sup>ANC visits by sociodemographic characteristics across the nine countries. Adequate ANC visit was lower among young women (15-19 years) in seven of the nine countries and the difference was significant in Ghana, Kenya, Malawi, Senegal, and Namibia. The odds of 4<sup>+</sup>ANC visit was lower by 2%-60% among rural residents compared to urban across all countries except in Zambia, in which women from rural places were 26% more to attend 4<sup>+</sup>ANCs, and the difference was significant ( $p < 0.001$ ) in all countries except in Rwanda ( $p = 0.283$ ).

Four or more ANC visits had positive association with increasing educational level. Women and husbands with secondary and above educational level had significantly higher odds of 4<sup>+</sup>ANC visits across all the studied countries ( $p < 0.05$ ).



Table 2. Univariate analysis of sociodemographic factors influencing 4+ANC visits in nine sub-Saharan Africa countries.

| Variables            | Ghana<br>3,224           | Kenya<br>10,981        | Malawi<br>9,541        | Namibia<br>2,286        | Rwanda<br>4,416        | Senegal<br>6,552       | Tanzania<br>5,536       | Uganda<br>7,979        | Zambia<br>5,487        | Total<br>56,002        |
|----------------------|--------------------------|------------------------|------------------------|-------------------------|------------------------|------------------------|-------------------------|------------------------|------------------------|------------------------|
| Age (grouped)        |                          |                        |                        |                         |                        |                        |                         |                        |                        |                        |
| 15-19                | 1.00[Ref]                | 1.00[Ref]              | 1.00[Ref]              | 1.00[Ref]               | 1.00[Ref]              | 1.00[Ref]              | 1.00[Ref]               | 1.00[Ref]              | 1.00[Ref]              | 1.00[Ref]              |
| 20-24                | 1.40(0.92,2.13)          | <b>1.32(1.13,1.54)</b> | <b>1.21(1.05,1.39)</b> | <b>1.79(1.28,2.50)</b>  | 1.26(0.88,1.79)        | <b>1.34(1.10,1.62)</b> | 1.10(0.90,1.34)         | 1.15(0.98,1.36)        | 1.17(0.97,1.41)        | <b>1.21(1.13,1.29)</b> |
| 25-29                | <b>1.89(1.24,2.87)</b>   | <b>1.37(1.18,1.60)</b> | <b>1.38(1.19,1.60)</b> | <b>2.21(1.56,3.13)</b>  | 1.36(0.96,1.93)        | <b>1.31(1.08,1.59)</b> | 1.16(0.95,1.42)         | 1.18(0.99,1.39)        | 1.07(0.89,1.30)        | <b>1.27(1.19,1.36)</b> |
| 30-34                | <b>1.70(1.12,2.58)</b>   | <b>1.26(1.07,1.48)</b> | <b>1.43(1.22,1.66)</b> | <b>2.34(1.61,3.40)</b>  | 1.15(0.81,1.64)        | <b>1.28(1.05,1.57)</b> | 1.07(0.87,1.32)         | 1.11(0.94,1.33)        | 1.16(0.95,1.42)        | <b>1.23(1.15,1.32)</b> |
| 35 and above         | <b>1.52(1.01,2.29)</b>   | 1.10(0.93,1.29)        | <b>1.39(1.19,1.62)</b> | <b>1.90(1.33,2.71)</b>  | 1.03(0.72,1.46)        | 1.14(0.94,1.39)        | 0.87(0.71,1.07)         | <b>0.83(0.70,0.99)</b> | 1.04(0.85,1.26)        | <b>1.10(1.02,1.17)</b> |
| Place of residence   |                          |                        |                        |                         |                        |                        |                         |                        |                        |                        |
| Urban                | 1.00[Ref]                | 1.00[Ref]              | 1.00[Ref]              | 1.00[Ref]               | 1.00[Ref]              | 1.00[Ref]              | 1.00[Ref]               | 1.00[Ref]              | 1.00[Ref]              | 1.00[Ref]              |
| Rural                | <b>0.40(0.32,0.50)</b>   | <b>0.60(0.55,0.65)</b> | <b>0.69(0.62,0.77)</b> | <b>0.66(0.54,0.81)</b>  | 0.98(0.85,1.13)        | <b>0.43(0.38,0.47)</b> | <b>0.52(0.45,0.58)</b>  | <b>0.68(0.60,0.76)</b> | <b>1.26(1.12,1.42)</b> | <b>0.61(0.59,0.63)</b> |
| Women's education    |                          |                        |                        |                         |                        |                        |                         |                        |                        |                        |
| No schooling         | 1.00[Ref]                | 1.00[Ref]              | 1.00[Ref]              | 1.00[Ref]               | 1.00[Ref]              | 1.00[Ref]              | 1.00[Ref]               | 1.00[Ref]              | 1.00[Ref]              | 1.00[Ref]              |
| Primary              | 1.23(0.96,1.58)          | <b>1.49(1.35,1.65)</b> | <b>1.15(1.01,1.30)</b> | <b>1.77(1.24,2.51)</b>  | <b>1.33(1.11,1.59)</b> | <b>1.70(1.50,1.93)</b> | <b>1.40(1.22,1.62)</b>  | 1.13(0.99,1.30)        | <b>1.22(1.01,1.47)</b> | <b>1.30(1.25,1.36)</b> |
| Secondary            | <b>2.61(2.06,3.30)</b>   | <b>2.23(1.98,2.51)</b> | <b>1.38(1.18,1.60)</b> | <b>3.41(2.46,4.72)</b>  | <b>1.40(1.11,1.77)</b> | <b>2.13(1.76,2.58)</b> | <b>2.36(1.99,2.80)</b>  | <b>1.61(1.37,1.90)</b> | 1.18(0.97,1.43)        | <b>2.21(2.10,2.33)</b> |
| Higher               | <b>3.51(2.86, 4.17)</b>  | <b>5.91(4.85,7.20)</b> | <b>3.72(2.58,5.37)</b> | <b>14.43(5.6,37.14)</b> | <b>4.91(3.11,7.78)</b> | <b>7.11(2.43,20.8)</b> | <b>8.54(3.98,18.35)</b> | <b>2.65(2.06,3.40)</b> | <b>3.38(2.28,5.01)</b> | <b>4.97(4.42,5.58)</b> |
| Husband's education  |                          |                        |                        |                         |                        |                        |                         |                        |                        |                        |
| No schooling         | 1.00[Ref]                | 1.00[Ref]              | 1.00[Ref]              | 1.00[Ref]               | 1.00[Ref]              | 1.00[Ref]              | 1.00[Ref]               | 1.00[Ref]              | 1.00[Ref]              | 1.00[Ref]              |
| Primary              | <b>1.35(0.97,1.87)</b>   | <b>1.57(1.34,1.84)</b> | 1.03(0.88,1.20)        | <b>1.46(0.96,2.22)</b>  | <b>1.23(1.03,1.47)</b> | <b>1.82(1.54,2.15)</b> | <b>1.47(1.23,1.76)</b>  | 0.95(0.80,1.14)        | 1.11(0.84,1.45)        | <b>1.25(1.19,1.31)</b> |
| Secondary            | <b>2.05(1.63,2.58)</b>   | <b>2.27(1.90,2.71)</b> | <b>1.21(1.03,1.43)</b> | <b>2.38(1.66,3.43)</b>  | 1.17(0.90,1.51)        | <b>2.38(1.95,2.91)</b> | <b>2.59(2.10,3.20)</b>  | <b>1.33(1.09,1.62)</b> | 1.09(0.84,1.43)        | <b>2.06(1.95,2.18)</b> |
| Higher               | <b>7.03(3.66,13.49)</b>  | <b>4.19(3.27,5.37)</b> | <b>2.25(1.73,2.92)</b> | 14.40(4.38,47.36)       | <b>2.49(1.72,3.60)</b> | <b>3.12(2.12,4.58)</b> | <b>3.98(2.57,6.18)</b>  | <b>1.96(1.55,2.50)</b> | <b>2.26(1.58,3.24)</b> | <b>3.52(3.19,3.88)</b> |
| Women's occupation   |                          |                        |                        |                         |                        |                        |                         |                        |                        |                        |
| Not working O/H      | 1.00[Ref]                | 1.00[Ref]              | 1.00[Ref]              | 1.00[Ref]               | 1.00[Ref]              | 1.00[Ref]              | 1.00[Ref]               | 1.00[Ref]              | 1.00[Ref]              | 1.00[Ref]              |
| Professional/Skilled |                          |                        |                        |                         |                        |                        |                         |                        |                        |                        |
| work                 | <b>2.27(1.73,2.97)</b>   | <b>2.33(1.86,2.91)</b> | <b>1.35(1.17,1.56)</b> | <b>1.88(1.47,2.40)</b>  | <b>1.45(1.11,1.89)</b> | <b>1.33(1.17,1.51)</b> | <b>1.72(1.35,2.19)</b>  | <b>1.42(1.23,1.63)</b> | <b>1.29(1.10,1.51)</b> | <b>1.73(1.64,1.82)</b> |
| Agriculture          | 0.80(0.62,1.03)          | 0.95(0.83,1.09)        | 1.05(0.95,1.15)        | 2.26(0.95,5.39)         | 1.20(0.95,1.51)        | <b>0.62(0.54,0.71)</b> | <b>0.63(0.55,0.73)</b>  | <b>1.06(0.93,1.20)</b> | <b>1.24(1.08,1.42)</b> | <b>0.87(0.84,0.91)</b> |
| Unskilled            | <b>8.02(1.94,33.15)</b>  | <b>1.25(1.10,1.43)</b> | 1.12(0.99,1.27)        | <b>1.72(1.22,2.42)</b>  | 0.84(0.58,1.21)        | <b>1.40(1.16,1.68)</b> | 1.09(0.92,1.29)         | <b>1.58(1.31,1.91)</b> | 1.02(0.84,1.24)        | <b>1.13(1.07,1.20)</b> |
| Husband's occupation |                          |                        |                        |                         |                        |                        |                         |                        |                        |                        |
| Not working O/H      |                          | 1.00[Ref]              | 1.00[Ref]              | 1.00[Ref]               | 1.00[Ref]              | 1.00[Ref]              | 1.00[Ref]               | 1.00[Ref]              | 1.00[Ref]              | 1.00[Ref]              |
| Professional/Skilled |                          |                        |                        |                         |                        |                        |                         |                        |                        |                        |
| work                 | 1.00[Ref]                | 1.54(0.99,2.39)        | <b>1.18(1.00,1.39)</b> | 0.65(0.08,5.28)         | 0.82(0.37,1.84)        | 1.06(0.78,1.46)        | <b>2.21(1.17,4.16)</b>  | <b>1.32(1.00,1.74)</b> | 1.16(0.92,1.45)        | <b>1.35(1.22,1.49)</b> |
| Agriculture          | <b>0.30(0.23,0.39)</b>   | 0.76(0.49,1.18)        | 0.98(0.84,1.15)        | 0.27(0.03,2.18)         | 0.86(0.38,1.92)        | <b>0.52(0.38,0.72)</b> | <b>1.16(0.62,2.17)</b>  | 0.86(0.65,1.14)        | 1.21(0.97,1.51)        | <b>0.86(0.78,0.95)</b> |
| Unskilled            | 0.89(0.60,1.32)          | 1.09(0.71,1.69)        | 1.00(0.85,1.19)        | 0.55(0.07,4.51)         | 0.74(0.32,1.67)        | 0.96(0.69,1.34)        | 1.97(1.04,3.72)         | 1.15(0.85,1.55)        | 0.97(0.76,1.24)        | 1.10(0.99,1.22)        |
| Wealth quintile      |                          |                        |                        |                         |                        |                        |                         |                        |                        |                        |
| Poorest              | 1.00[Ref]                | 1.00[Ref]              | 1.00[Ref]              | 1.00[Ref]               | 1.00[Ref]              | 1.00[Ref]              | 1.00[Ref]               | 1.00[Ref]              | 1.00[Ref]              | 1.00[Ref]              |
| Poorer               | 1.22(0.96,1.56)          | <b>1.37(1.23,1.52)</b> | 1.11(0.98,1.25)        | 1.03(0.77,1.37)         | 1.15(0.96,1.37)        | <b>1.50(1.31,1.72)</b> | 1.13(0.95,1.33)         | <b>1.16(1.02,1.32)</b> | 1.04(0.89,1.22)        | <b>1.19(1.14,1.25)</b> |
| Middle               | <b>1.67(1.26,2.20)</b>   | <b>1.70(1.52,1.90)</b> | 1.07(0.95,1.21)        | <b>1.40(1.04,1.88)</b>  | <b>1.22(1.01,1.47)</b> | <b>2.10(1.82,2.42)</b> | <b>1.35(1.14,1.59)</b>  | <b>1.25(1.09,1.43)</b> | 0.90(0.76,1.05)        | <b>1.34(1.27,1.41)</b> |
| Richer               | <b>4.40(2.94,6.59)</b>   | <b>2.12(1.89,2.39)</b> | <b>1.19(1.05,1.35)</b> | <b>1.70(1.25,2.31)</b>  | 1.18(0.98,1.43)        | <b>3.48(2.96,4.10)</b> | <b>2.07(1.76,2.44)</b>  | <b>1.48(1.29,1.71)</b> | <b>0.72(0.61,0.86)</b> | <b>1.60(1.52,1.69)</b> |
| Richest              | <b>13.36(6.53,27.33)</b> | <b>3.41(3.00,3.88)</b> | <b>1.65(1.45,1.87)</b> | <b>2.59(1.77,3.80)</b>  | 1.10(0.92,1.32)        | <b>5.93(4.81,7.31)</b> | <b>3.02(2.53,3.60)</b>  | 1.87(1.62,2.16)        | 1.18(0.98,1.42)        | <b>2.13(2.02,2.25)</b> |
| Birth order          |                          |                        |                        |                         |                        |                        |                         |                        |                        |                        |
| First                | 1.00[Ref]                | 1.00[Ref]              | 1.00[Ref]              | 1.00[Ref]               | 1.00[Ref]              | 1.00[Ref]              | 1.00[Ref]               | 1.00[Ref]              | 1.00[Ref]              | 1.00[Ref]              |

|                                                                             |                        |                        |                        |                        |                        |                        |                        |                        |                        |                        |
|-----------------------------------------------------------------------------|------------------------|------------------------|------------------------|------------------------|------------------------|------------------------|------------------------|------------------------|------------------------|------------------------|
| Second                                                                      | 1.18(0.85,1.65)        | 0.91(0.81,1.02)        | <b>0.89(0.79,1.00)</b> | 1.14(0.86,1.50)        | 0.88(0.74,1.03)        | 0.93(0.79,1.08)        | <b>0.82(0.70,0.97)</b> | 1.01(0.87,1.16)        | 0.97(0.82,1.14)        | <b>0.93(0.88,0.98)</b> |
| Third                                                                       | 0.85(0.62,1.18)        | <b>0.80(0.71,0.91)</b> | 0.97(0.85,1.10)        | <b>1.41(1.01,1.96)</b> | 0.83(0.69,1.00)        | <b>0.75(0.64,0.88)</b> | <b>0.72(0.61,0.86)</b> | 0.95(0.82,1.11)        | 0.89(0.74,1.06)        | <b>0.87(0.82,0.92)</b> |
| Fourth                                                                      | 1.06(0.74,1.53)        | <b>0.68(0.60,0.78)</b> | 0.98(0.86,1.12)        | 0.86(0.61,1.23)        | <b>0.61(0.50,0.76)</b> | <b>0.73(0.61,0.87)</b> | <b>0.65(0.54,0.79)</b> | 0.91(0.77,1.07)        | 1.04(0.85,1.26)        | <b>0.81(0.76,0.86)</b> |
| Fifth & above                                                               | <b>0.56(0.42,0.73)</b> | <b>0.51(0.46,0.57)</b> | 0.96(0.86,1.08)        | <b>0.59(0.45,0.79)</b> | <b>0.58(0.49,0.69)</b> | <b>0.58(0.50,0.66)</b> | <b>0.50(0.43,0.58)</b> | <b>0.71(0.62,0.80)</b> | <b>0.82(0.71,0.96)</b> | <b>0.65(0.62,0.68)</b> |
| Frequency of listening to radio/ watching TV/ reading newspaper or magazine |                        |                        |                        |                        |                        |                        |                        |                        |                        |                        |
| Not at all                                                                  | 1.00[Ref]              |
| Less than once a week                                                       | <b>1.88(1.42,2.48)</b> | <b>1.59(1.39,1.81)</b> | 1.05(0.94,1.18)        | <b>2.01(1.46,2.78)</b> | 1.01(0.83,1.22)        | 1.19(0.99,1.42)        | <b>1.35(1.16,1.57)</b> | <b>1.29(1.11,1.49)</b> | 0.97(0.80,1.17)        | <b>1.15(1.09,1.21)</b> |
| At least once a week                                                        | <b>4.02(3.11,5.20)</b> | <b>2.08(1.90,2.28)</b> | <b>1.27(1.16,1.39)</b> | <b>2.91(2.21,3.83)</b> | 1.14(0.96,1.34)        | <b>1.91(1.64,2.22)</b> | <b>2.00(1.73,2.32)</b> | <b>1.52(1.37,1.69)</b> | 1.14(0.96,1.36)        | <b>1.53(1.47,1.59)</b> |

**Bold font indicates a significant difference from reference at p<0.05.** O/H: outside home.

1  
2  
3 Compared to women who had not work outside home, the odds of 4<sup>+</sup>ANC visits  
4 were significantly higher among professional women. Odds of 4<sup>+</sup>ANC visit in relation  
5 to household wealth status had considerable variation among the countries ranging  
6 from 1.10(95% CI: 0.92 to 1.32) in Rwanda to 13.36(95% CI: 6.53 to 27.33) in  
7  
8  
9  
10  
11  
12  
13  
14  
15  
16  
17  
18  
19  
20  
21  
22  
23  
24  
25  
26  
27  
28  
29  
30  
31  
32  
33  
34  
35  
36  
37  
38  
39  
40  
41  
42  
43  
44  
45  
46  
47  
48  
49  
50  
51  
52  
53  
54  
55  
56  
57  
58  
59  
60

The pattern of 4<sup>+</sup>ANC utilization shows an inverse relationship with birth order. Women of fifth and above birth order had significant lower ANC attendance than first birth order. Listening to radio/ watching TV/ reading newspaper or magazine had a significant positive association with 4<sup>+</sup>ANC attendance across all countries except in Rwanda and Zambia (Table 2).

### **Multivariable findings**

Table 3 summarizes data analysis results adjusted by sociodemographic variables and the overall adjusted by cluster (country).

Overall, the 4<sup>+</sup>ANC visits were 14% lower among women from the rural area than from urban, and the difference was significant (AOR: 0.86; 95% CI: 0.81 to 0.91). Multivariable logistic regression analysis exploring the relationship between 4<sup>+</sup>ANC visits and place of residence was significant in four countries (Kenya, Malawi, Senegal and Zambia). While in Ghana, Namibia, Rwanda, Tanzania, and Uganda; 4<sup>+</sup>ANC visit had no association with place of residence. Unlike all countries, in Zambia, the odds of 4<sup>+</sup>ANC visits was 48% higher (AOR: 1.48; 95% CI: 1.2 to 1.82) among rural women than urban.

Findings of selected sociodemographic predictors related to ANC visit after adjusted for cluster (country) variations indicated that the odds of 4<sup>+</sup>ANC visits increased from 14% (AOR:1.14; 95% CI: 1.07to 1.21, p<0.001) to 96% (AOR:1.96; 95% CI: 1.65to 2.33, p<0.001) with an increase in women's educational level.

1  
2  
3 Women with higher educational levels had more than two-fold higher odds of 4<sup>+</sup>ANC  
4 visits in seven of the nine countries, and the difference was significant in four (Kenya,  
5 Malawi, Rwanda, and Zambia). Husband's higher educational level had significant  
6 association with 12% (AOR: 1.12; 95% CI: 1.05 to 1.20) to 48% (AOR: 1.48; 95% CI:  
7 1.31 to 1.69) higher odds 4<sup>+</sup>ANC visits of women ( $p < 0.001$ ). Country wise this  
8 association was significant in Kenya, Malawi, and Zambia.  
9

10  
11  
12 Overall, women's occupation had a positive association with 4<sup>+</sup>ANC visits. The  
13 variation on 4<sup>+</sup>ANC visits was 19% (AOR: 1.19; 95% CI: 1.11 to 1.27), 7% (AOR:  
14 1.07; 95% CI: 1.01 to 1.13), and 13% (AOR: 1.13; 95% CI: 1.05 to 1.21) more among  
15 women working as Professional/Skilled, Agriculture, and Unskilled labour  
16 respectively compared to women not working outside home. In Ghana, the odds of  
17 4<sup>+</sup>ANC visits was fifteen times (AOR: 15.54; 95%CI: 2.1 to 114.9) higher among  
18 employed women than women who had no work outside home. Another similar group,  
19 women in Uganda, were 62% more to attend 4<sup>+</sup>ANC (AOR: 1.62; 95%CI: 1.28 to  
20 2.05). Agriculture employed women in Kenya, Senegal, and Tanzania and unskilled  
21 worker in Rwanda, Tanzania, and Zambia had non-significant lower uptake of  
22 4<sup>+</sup>ANCs.  
23  
24

25  
26  
27 Women in the wealthiest group were highly likely to receive more 4<sup>+</sup>ANC visits.  
28 After adjusting for cluster (country), ANC service utilization increased by 12 %  
29 (AOR:1.12; 95% CI: 1.06 to 1.19), 18% ( AOR:1.18; 95% CI: 1.11 to 1.26), 32%  
30 (AOR:1.32; 95% CI: 1.23 to 1.42), and 41% (AOR:1.41; 95% CI: 1.29 to 1.55) for  
31 every 20% variation on the wealth category compared to the poorest level, and the  
32 difference was significant ( $p < 0.001$ ) (Table 3). This association was uniform across  
33 the studied countries except in Rwanda where women in the highest wealth quantiles  
34 were 23% lower (AOR: 0.77; 95% CI: 0.57 to 1.02) to up-take 4<sup>+</sup>ANC than the  
35  
36  
37  
38  
39  
40  
41  
42  
43  
44  
45  
46  
47  
48  
49  
50  
51  
52  
53  
54  
55  
56  
57  
58  
59  
60

1  
2  
3 poorest group. The odds of 4<sup>+</sup>ANC visits were 4% (AOR: 0.96; 95% CI: 0.78 to 1.19)  
4  
5 and 14% (AOR: 0.86; 95% CI: 0.64 to 1.16) lower among middle and richer  
6  
7 economic status in Zambia.  
8  
9

10 Women with previous birth experience had significant ( $p<0.001$ ) lower uptake of  
11  
12 ANC services than first birth order. Odds of 4<sup>+</sup>ANC visits were lower by 16% (AOR:  
13  
14 0.84; 95% CI: 0.79 to 0.90), 21% (AOR: 0.79; 95% CI: 0.74 to 0.85), 23% (AOR:  
15  
16 0.77; 95% CI: 0.72 to 0.83), and 32% (AOR: 0.68; 95% CI: 0.64 to 0.73) for second,  
17  
18 third, fourth, and fifth and above birth orders than first birth order (Table 3). Country  
19  
20 wise analysis shows, the birth order difference on 4<sup>+</sup>ANC visits were significant in  
21  
22 Kenya, Rwanda, Senegal, Tanzania, Uganda, and Zambia.  
23  
24  
25

26 Women who had access to media at least once a week had 22% higher odds of  
27  
28 4<sup>+</sup>ANC visit than women who have not at all (AOR: 1.22; 95%CI: 1.15 to 1.29). This  
29  
30 association was significant in all countries except in Malawi, Rwanda, Senegal, and  
31  
32 Zambia.  
33  
34  
35  
36  
37  
38  
39  
40  
41  
42  
43  
44  
45  
46  
47  
48  
49  
50  
51  
52  
53  
54  
55  
56  
57  
58  
59  
60

**Table 3. Adjusted multivariable analysis of sociodemographic factors influencing 4<sup>+</sup>ANC visits in nine sub-Saharan countries.**

| Variables                                                   | Ghana                   | Kenya                  | Malawi                 | Namibia                | Rwanda                 | Senegal                | Tanzania               | Uganda                 | Zambia                 | Overall *              |
|-------------------------------------------------------------|-------------------------|------------------------|------------------------|------------------------|------------------------|------------------------|------------------------|------------------------|------------------------|------------------------|
| Place of residence                                          |                         |                        |                        |                        |                        |                        |                        |                        |                        |                        |
| Urban                                                       | 1.00[Ref]               | 1.00[Ref]              | 1.00[Ref]              | 1.00[Ref]              | 1.00[Ref]              | 1.00[Ref]              | 1.00[Ref]              | 1.00[Ref]              | 1.00[Ref]              | 1.00[Ref]              |
| Rural                                                       | 0.84(0.61,1.15)         | <b>0.83(0.72,0.9)</b>  | <b>0.83(0.71,0.96)</b> | 0.83(0.57,1.21)        | 0.95(0.77,1.18)        | <b>0.73(0.62,0.84)</b> | 0.83(0.69,1.01)        | 0.86(0.72,1.01)        | <b>1.48(1.2,1.82)</b>  | <b>0.86(0.81,0.91)</b> |
| Women's education                                           |                         |                        |                        |                        |                        |                        |                        |                        |                        |                        |
| No schooling                                                | 1.00[Ref]               | 1.00[Ref]              | 1.00[Ref]              | 1.00[Ref]              | 1.00[Ref]              | 1.00[Ref]              | 1.00[Ref]              | 1.00[Ref]              | 1.00[Ref]              | 1.00[Ref]              |
| Primary                                                     | 1.06(0.78,1.43)         | 1.12(0.90,1.39)        | 1.09(0.94,1.27)        | 1.34(0.83,2.16)        | 1.20(0.99,1.46)        | 1.06(0.91,1.23)        | 1.04(0.88,1.22)        | 1.03(0.87,1.22)        | 1.12(0.90,1.41)        | <b>1.14(1.07,1.21)</b> |
| Secondary                                                   | <b>1.47(1.05,2.05)</b>  | 1.23(0.94,1.60)        | 1.11(0.91,1.35)        | <b>1.78(1.04,3.05)</b> | 1.28(0.95,1.74)        | 1.08(0.84,1.4)         | 1.00(0.79,1.28)        | 1.19(0.96,1.47)        | 1.05(0.81,1.38)        | <b>1.17(1.08,1.21)</b> |
| Higher                                                      | 4.82(0.6,37.23)         | <b>2.17(1.42,3.32)</b> | <b>2.26(1.42,3.60)</b> | 2.13(0.51,8.93)        | <b>3.82(2.17,6.73)</b> | 1.78(0.58,5.47)        | 2.19(0.91,5.30)        | 1.30(0.92,1.83)        | <b>2.06(1.20,355)</b>  | <b>1.96(1.65,2.33)</b> |
| Husband's education                                         |                         |                        |                        |                        |                        |                        |                        |                        |                        |                        |
| No schooling                                                | 1.00[Ref]               | 1.00[Ref]              | 1.00[Ref]              | 1.00[Ref]              | 1.00[Ref]              | 1.00[Ref]              | 1.00[Ref]              | 1.00[Ref]              | 1.00[Ref]              | 1.00[Ref]              |
| Primary                                                     | 1.04(0.73,1.48)         | 1.08(0.87,1.36)        | 0.97(0.83,1.15)        | 1.11(0.71,1.75)        | 1.10(0.91,1.33)        | <b>1.35(1.13,1.61)</b> | 1.18(0.98,1.42)        | 0.86(0.70,1.05)        | 1.07(0.81,1.42)        | <b>1.12(1.05,1.20)</b> |
| Secondary                                                   | 0.97(0.72,1.33)         | 1.20(0.93,1.56)        | 1.06(0.88,1.27)        | 1.21(0.77,1.88)        | 0.93(0.69,1.24)        | <b>1.36(1.09,1.71)</b> | <b>1.35(1.05,1.72)</b> | 1.01(0.80,1.26)        | 1.15(0.86,1.54)        | <b>1.17(1.09,1.27)</b> |
| Higher                                                      | 1.42(0.69,2.93)         | <b>1.41(1.00,1.97)</b> | <b>1.42(1.03,1.95)</b> | 3.57(0.9,14.17)        | 1.42(0.88,2.27)        | 1.32(0.86,2.02)        | 1.38(0.84,2.27)        | 1.22(0.91,1.63)        | <b>1.91(1.23,2.96)</b> | <b>1.48(1.31,1.69)</b> |
| Mother's occupation                                         |                         |                        |                        |                        |                        |                        |                        |                        |                        |                        |
| Not working O/H                                             | 1.00[Ref]               | 1.00[Ref]              | 1.00[Ref]              | 1.00[Ref]              | 1.00[Ref]              | 1.00[Ref]              | 1.00[Ref]              | 1.00[Ref]              | 1.00[Ref]              | 1.00[Ref]              |
| Professional/Skilled work                                   | <b>1.99(1.46,2.27)</b>  | 1.19(0.91,1.56)        | 0.97(0.81,1.15)        | <b>1.64(1.11,2.44)</b> | 1.23(0.91,1.66)        | 1.09(0.94,1.26)        | 1.24(0.93,1.65)        | <b>1.38(1.18,1.62)</b> | <b>1.24(1.01,1.50)</b> | <b>1.19(1.11,1.27)</b> |
| Agriculture                                                 | <b>1.44(1.06,1.97)</b>  | 0.98(0.83,1.15)        | 1.08(0.96,1.19)        | 2.25(0.75,6.72)        | 1.16(0.87,1.53)        | 0.89(0.76,1.04)        | 0.89(0.75,1.07)        | <b>1.26(1.09,1.46)</b> | 1.14(0.96,1.35)        | <b>1.07(1.01,1.13)</b> |
| Unskilled                                                   | <b>15.54(2.1,114.9)</b> | 1.06(0.91,1.24)        | 1.07(0.92,1.22)        | 1.58(0.85,2.97)        | 0.79(0.52,1.21)        | 1.09(0.87,1.35)        | 0.95(0.78,1.16)        | <b>1.62(1.28,2.05)</b> | 0.96(0.76,1.23)        | <b>1.13(1.05,1.21)</b> |
| Wealth quintile                                             |                         |                        |                        |                        |                        |                        |                        |                        |                        |                        |
| Poorest                                                     | 1.00[Ref]               | 1.00[Ref]              | 1.00[Ref]              | 1.00[Ref]              | 1.00[Ref]              | 1.00[Ref]              | 1.00[Ref]              | 1.00[Ref]              | 1.00[Ref]              | 1.00[Ref]              |
| Poorer                                                      | 0.93(0.70,1.23)         | 1.09(0.91,1.32)        | 1.07(0.94,1.23)        | 0.74(0.48,1.13)        | 1.06(0.87,1.28)        | <b>1.37(1.19,1.58)</b> | 1.05(0.87,1.26)        | <b>1.18(1.02,1.37)</b> | 1.09(0.91,1.32)        | <b>1.12(1.06,1.19)</b> |
| Middle                                                      | 0.93(0.64,1.36)         | 1.18(0.96,1.45)        | 1.09(0.94,1.26)        | 0.85(0.53,1.36)        | 1.12(0.91,1.37)        | <b>1.56(1.32,1.86)</b> | 1.15(0.95,1.40)        | <b>1.19(1.01,1.40)</b> | 0.96(0.78,1.19)        | <b>1.18(1.11,1.26)</b> |
| Richer                                                      | <b>1.88(1.09,3.23)</b>  | 1.21(0.97,1.51)        | 1.07(0.92,1.25)        | 0.79(0.45,1.40)        | 1.04(0.84,1.30)        | <b>2.26(1.83,2.79)</b> | <b>1.62(1.31,2.00)</b> | <b>1.29(1.08,1.5)</b>  | 0.86(0.64,1.16)        | <b>1.32(1.23,1.42)</b> |
| Richest                                                     | <b>4.74(1.9,11.95)</b>  | <b>1.55(1.19,2.04)</b> | <b>1.23(1.02,1.50)</b> | 1.31(0.57,3.00)        | 0.77(0.57,1.02)        | <b>3.62(2.78,4.72)</b> | <b>1.69(1.27,2.24)</b> | <b>1.27(1.02,1.60)</b> | 1.17(0.81,1.69)        | <b>1.41(1.29,1.55)</b> |
| Birth order                                                 |                         |                        |                        |                        |                        |                        |                        |                        |                        |                        |
| First                                                       | 1.00[Ref]               | 1.00[Ref]              | 1.00[Ref]              | 1.00[Ref]              | 1.00[Ref]              | 1.00[Ref]              | 1.00[Ref]              | 1.00[Ref]              | 1.00[Ref]              | 1.00[Ref]              |
| Second                                                      | 1.08(0.72,1.63)         | <b>0.71(0.58,0.87)</b> | <b>0.83(0.72,0.95)</b> | 1.22(0.74,1.99)        | <b>0.72(0.60,0.87)</b> | 0.88(0.74,1.06)        | <b>0.82(0.68,1.00)</b> | 0.95(0.80,1.13)        | 0.87(0.70,1.08)        | <b>0.84(0.79,0.90)</b> |
| Third                                                       | 0.77(0.52,1.15)         | <b>0.62(0.51,0.76)</b> | 0.91(0.79,1.05)        | 1.06(0.64,1.76)        | <b>0.68(0.55,0.83)</b> | <b>0.78(0.65,0.94)</b> | <b>0.72(0.59,0.89)</b> | 0.97(0.81,1.16)        | <b>0.76(0.61,0.96)</b> | <b>0.79(0.74,0.85)</b> |
| Fourth                                                      | 1.06(0.69,1.64)         | <b>0.56(0.45,0.70)</b> | 0.95(0.82,1.11)        | 1.12(0.65,1.94)        | 0.52(0.42,0.66)        | <b>0.76(0.62,0.92)</b> | <b>0.71(0.57,0.88)</b> | 0.88(0.73,1.07)        | 0.91(0.71,1.17)        | <b>0.77(0.72,0.83)</b> |
| Fifth & above                                               | 0.75(0.52,1.08)         | <b>0.50(0.41,0.61)</b> | 0.98(0.85,1.12)        | 0.79(0.49,1.26)        | <b>0.50(0.41,0.61)</b> | <b>0.68(0.58,0.80)</b> | <b>0.61(0.51,0.73)</b> | <b>0.77(0.65,0.90)</b> | <b>0.73(0.59,0.90)</b> | <b>0.68(0.64,0.73)</b> |
| Frequency of listening to radio/reading newspaper/magazines |                         |                        |                        |                        |                        |                        |                        |                        |                        |                        |
| Not at all                                                  | 1.00[Ref]               | 1.00[Ref]              | 1.00[Ref]              | 1.00[Ref]              | 1.00[Ref]              | 1.00[Ref]              | 1.00[Ref]              | 1.00[Ref]              | 1.00[Ref]              | 1.00[Ref]              |
| Less than once a week                                       | <b>1.47(1.08, 2.00)</b> | <b>1.35(1.08,1.68)</b> | 1.05(0.94,1.20)        | <b>1.94(1.22,3.07)</b> | 0.95(0.78,1.17)        | 1.06(0.87,1.29)        | 1.11(0.93,1.33)        | 1.13(0.96,1.34)        | 1.01(0.80,1.28)        | <b>1.08(1.01,1.15)</b> |
| At least once a week                                        | <b>2.62(1.96,3.50)</b>  | <b>1.21(1.02,1.44)</b> | 1.09(0.98,1.22)        | <b>2.31(1.51,3.53)</b> | 1.07(0.88,1.30)        | 1.14(0.96,1.35)        | <b>1.34(1.12,1.60)</b> | <b>1.24(1.09,1.41)</b> | 1.05(0.85,1.30)        | <b>1.22(1.15,1.29)</b> |

All are adjusted for sociodemographic factors and media exposure. \* adjusted for sociodemographic factors, media exposure, and country. **bold font** indicates a significant difference from reference at p<0.05, O/H: outside home

## Discussion

In an era of envision for every pregnant woman to receive quality care throughout her pregnancy, only 55.52% (95% CI: 55.11 to 55.93) women in nine sub-Saharan Africa countries have received 4<sup>+</sup>ANC on average three years before the survey. Our result indicated that there were disparities among the countries on 4<sup>+</sup>ANC with the highest in Ghana (85.61%) followed by Namibia (78.92%), and Zambia (64.2%), and the lowest proportion was from Rwanda (44.5%), Senegal (45.3%), and Tanzania (48.1%).

We have shown that women's demographic and socioeconomic factors including place of residence, women and husband educational level, women and husband occupational status, household wealth quantiles, birth order, and access listening to radio/reading newspaper/magazines were significant determinants of 4<sup>+</sup>ANC attendance. Therefore, there is an urgent need on intervention towards maximizing the utilization of ANC in the SSA countries.

The strength of this analysis is use of nationally-representative data from nine sub-Saharan Africa countries which is assumed to have a very minimum sampling (random or systemic) and instrumental errors through the use of an appropriate multistage stratified cluster sampling strategies, having a large sample size of 56,002 respondents, and weighted data analysis with reliable test of instrumentations. The analytical approach as pooled data support the outcome to be valid and the merit in segregating data allows to focus on aspects of ANC visits that may remain hidden in intra-national/national level indicators. Recall biases of self-report data and the cross-sectional nature of the studies limits for the cause-effect association of potential predictors. Since the data were obtained from countries DHS in a different time, awareness of participants may be varied due to time heterogeneity. Moreover, the data

1  
2  
3 in the present analysis did not consider the quality of care provided to pregnant  
4 women during ANC visit which could be a potential predictor for ANC attendance.  
5  
6

7  
8 Pooled data adjusted by countries has shown that rural place of residence, no  
9 women and husband schooling, no maternal employment, poor household economic  
10 status, second and above birth orders, and lack of access listening to radio/reading  
11 newspaper/magazines were significantly associated with lower utilization of 4<sup>+</sup>ANC  
12 (Table 3). This is in line with previous studies from low and middle income countries  
13  
14  
15  
16  
17  
18  
19  
20  
21  
22  
23  
24  
25  
26  
27  
28  
29  
30  
31  
32  
33  
34  
35  
36  
37  
38  
39  
40  
41  
42  
43  
44  
45  
46  
47  
48  
49  
50  
51  
52  
53  
54  
55  
56  
57  
58  
59  
60

Country-level data showed that; Ghana and Namibia had the highest attendance  
of 4<sup>+</sup>ANC visits across all reproductive age groups. Ghana's present finding was in  
line to the 2013 cross-sectional study where 86% of Ghanaian women reported  
attending 4<sup>+</sup>ANC visits <sup>21</sup>. Consistent with the finding on other studies in India and  
Nigeria, this report also showed that 4<sup>+</sup>ANC visits was very low in Rwanda, Senegal,  
Tanzania, Malawi, and Kenya <sup>23 24</sup>.

Women from rural place of residence had 5%-27% lower odds of 4<sup>+</sup>ANC visits in  
eight of the nine studied countries, and the difference was significant in Kenya,  
Malawi, and Senegal. However, one data (Zambia) indicated a 48% more uptake of  
4<sup>+</sup>ANCs by rural residents (Table 3). This finding in Zambia is contrary to other  
studies <sup>22-24</sup>.

Multivariable analysis proved that women and husband higher education were  
significant predictors of 4<sup>+</sup>ANC visits <sup>6 8 11 18 23</sup>. Women with higher educational  
levels had more than two-fold higher odds of 4<sup>+</sup>ANC visits and this difference was  
significant in Kenya, Malawi, Rwanda, and Zambia. Similarly, husband's higher  
educational level had significant association with 4<sup>+</sup>ANC visits of women in Kenya,  
Malawi, and Zambia <sup>32</sup>.



1  
2  
3 Women's occupation had non-uniform association with 4+ANC visits across  
4 countries. Women from Ghana and Uganda working as Professional/Skilled,  
5 Agriculture, and Unskilled labour had attended more ANC visits than women who do not  
6 work outside home similar to other study<sup>18</sup>. However, this association was  
7 insignificant or lower in seven of the nine countries (Kenya, Malawi, Namibia,  
8 Rwanda, Senegal, Tanzania, and Zambia)<sup>11</sup>.  
9

10 Both univariate and multivariable analysis showed that difference in wealth  
11 quantiles had association with the uptake of 4+ANCs<sup>7 8 21 25</sup>. Women from the highest  
12 wealth category had more access to 4+ANC visits than those at the lowest category  
13 and the difference was significant in Ghana, Kenya, Malawi, Senegal, Tanzania, and  
14 Uganda. This result in Rwanda was different after adjustment in which women in the  
15 richest wealth quantiles had 23% lower (AOR: 0.77; 95% CI: 0.57 to 1.02) 4+ANC  
16 visits than the poorest group, which is different from the existing literature<sup>11 18 21 23</sup>.  
17

18 Our findings revealed that women of first pregnancy were more likely to receive  
19 4+ANC than second and above except in Namibia. This might be due to they are more  
20 careful about the pregnancy experiences<sup>33</sup>. This difference was significant in Kenya,  
21 Rwanda, Senegal, Tanzania, Uganda, and Zambia, similar to previous research studies  
22<sup>10 18</sup>. Consistent to our findings in Namibia, research from Nigeria suggested that  
23 adolescents are less likely to attend ANC services<sup>29</sup>.  
24

25 Listening to radio/ watching TV/ reading newspapers or magazines at least once a  
26 week had a positive association with the uptake of 4+ANC across all the studied  
27 countries. The odds of 4+ANC visit among women who had access to media at least  
28 once a week was more than two-folds higher in Ghana (AOR:2.62; 95% CI: 1.96 to  
29 3.50) and Namibia (AOR:2.31; 95% CI: 1.51 to 3.53). This association was not  
30  
31  
32  
33  
34  
35  
36  
37  
38  
39  
40  
41  
42  
43  
44  
45  
46  
47  
48  
49  
50  
51  
52  
53  
54  
55  
56  
57  
58  
59  
60

1  
2  
3  
4 significant in Rwanda, Senegal, Malawi, and Zambia despite the previous evidences<sup>8</sup>  
5  
6  
7 11 18 23.

8  
9 In summary, despite the importance of attending the WHO recommended level of  
10  
11 at least 4+ANC visits for a normal pregnancy<sup>1</sup>, our analysis demonstrated that many  
12  
13 women in SSA have limited access. The result of this study indicate that, disparities  
14  
15 on 4+ANC visits were related to women economic as well as physical barriers<sup>12 25</sup>.  
16  
17 Therefore, interventions on addressing the inequalities on ANC services use among  
18  
19 women from rural areas and limited resources are crucial. Although not all 100%, the  
20  
21 lesson from neighboring countries like Ghana which could be due to community  
22  
23 based health insurance and other countries in the sub-Saharan countries<sup>8 21 27</sup> are ideal  
24  
25 examples for country based policy evaluation towards ANC use optimization.  
26  
27 Furthermore, governments commitment on community insurance is crucial to avoid  
28  
29 the challenges like in Rwanda which was functional 1999-2012<sup>34</sup>, but in this analysis  
30  
31 DHS 2014/2015 it is the lowest.  
32  
33  
34  
35

36 Moreover, awareness raising programs and access to health information should  
37  
38 be improved. The possible justification for women and husband with higher education  
39  
40 had more uptake of 4+ANC could be educated women and husbands knew the  
41  
42 importance of adequate ANC attendance.  
43  
44

#### 45 **Conclusion and recommendation**

46  
47 Four or more ANC service utilization is low among women of the SSA countries.  
48  
49 Countries had varied practices of 4+ANC visits despite its importance. Therefore,  
50  
51 regional and country-specific maternal health program interventions are required to  
52  
53 address the barriers of adequate ANC visits. Moreover, health program should target  
54  
55 particularly to women of rural resident, had no schooling, no outside home occupation,  
56  
57 from low-household economic status, non-first-time pregnancy, and had no access to  
58  
59  
60

1  
2  
3 listening radio/ watching TV/ reading newspapers or magazines. Furthermore, ANC  
4 use barriers at individual and community level and health services need to be  
5 investigated.  
6  
7  
8

9  
10 **Author Contributions:** AKA conceived and designed the study methodology,  
11 conducted the literature review, formal analysis, and wrote original draft. AKA, LXZ,  
12 ZZH, MEM, and QQ revised the document and LXZ supervision the study. All  
13 authors read and approved the final manuscript.  
14  
15  
16  
17  
18

19  
20 **Funding:** The authors have not declared a specific grant for this research from any  
21 funding in the public, commercial or not-for-profit sectors.  
22  
23  
24

25 **Acknowledgments:** The authors are grateful to the Measure DHS, ICF international,  
26 Rockville, Maryland, USA for providing the data for analysis.  
27  
28  
29

30 **Competing interests:** None declared.  
31  
32

33 **Patients consent for publication:** Not required.  
34  
35

36 **Ethics approval:** This study was exempt from review by the ethics committee as  
37 publicly available data sets were used and no identifying participant information was  
38 obtained. The authorization for using the data in the current analysis was granted from  
39 the DHS program: DHS, ICF international, Rockville, Maryland, USA office upon  
40 presenting the research protocol and research plan aims.  
41  
42  
43  
44  
45  
46  
47

48 **Data availability statement:** Data sets used in the analysis are publicly available and  
49 can be accessed online through application to MEASURE DHS. Analysis syntaxes  
50 and outputs generated for the study can be made available upon request to the  
51 corresponding author.  
52  
53  
54  
55

56  
57 Figure captions  
58  
59  
60

**Figure 1:** Flow chart of the process of selection of women for analysis of 4<sup>+</sup>ANC visits

**Figure 2.** Proportion of women attending 4<sup>+</sup>ANC visits three years before the DHS survey (online).

**Figure 3.** Distribution of 4<sup>+</sup>ANC visits of women by sociodemographic factors, with 95% confidence interval

## References

1. WHO Recommendations on Antenatal Care for a Positive Pregnancy Experience. Geneva: World Health Organization, 2016.
2. Trends in maternal mortality 2000 to 2017: estimates by WHO, UNICEF, UNFPA, World Bank Group and the United Nations Population Division. Geneva: World Health Organization; 2019. Licence: CC BY-NC-SA 3.0 IGO.
3. United Nations Inter-agency Group for Child Mortality Estimation (UNIGME) UNCsF. 'Levels & Trends in Child Mortality: Report 2019, Estimates developed by the United Nations Inter-agency Group for Child Mortality Estimation'. New York 2019
4. Hug L, Alexander M, You D, et al. National, regional, and global levels and trends in neonatal mortality between 1990 and 2017, with scenario-based projections to 2030: a systematic analysis. *The Lancet Global health* 2019;7(6):e710-e20. doi: 10.1016/s2214-109x(19)30163-9 [published Online First: 2019/05/18]
5. group TAFMaNHIAms. Population-based rates, timing, and causes of maternal deaths, stillbirths, and neonatal deaths in south Asia and sub-Saharan Africa: a multi-country prospective cohort study. *The Lancet Global health* 2018;6(12):e1297-e308. doi: 10.1016/s2214-109x(18)30385-1 [published Online First: 2018/10/27]
6. WHO. Antenatal Care in Developing Countries Promises, achievements and missed opportunities, An analysis of trends, levels and differentials, 1990-2001. 2003:36.
7. Moller AB, Petzold M, Chou D, et al. Early antenatal care visit: a systematic analysis of regional and global levels and trends of coverage from 1990 to 2013. *The Lancet Global health* 2017;5(10):e977-e83. doi: 10.1016/s2214-109x(17)30325-x [published Online First: 2017/09/16]
8. Tekelab T, Chojenta C, Smith R, et al. Factors affecting utilization of antenatal care in Ethiopia: A systematic review and meta-analysis. *PloS one* 2019;14(4):e0214848. doi: 10.1371/journal.pone.0214848 [published Online First: 2019/04/12]
9. Tekelab T, Chojenta C, Smith R, et al. The impact of antenatal care on neonatal mortality in sub-Saharan Africa: A systematic review and meta-analysis. 2019;14(9):e0222566. doi: 10.1371/journal.pone.0222566
10. Woldegiorgis MA, Hiller J, Mekonnen W, et al. Determinants of antenatal care and skilled birth attendance in sub-Saharan Africa: A multilevel analysis. *Health services research* 2019;54(5):1110-18. doi: 10.1111/1475-6773.13163 [published Online First: 2019/05/16]
11. Tripathi V, Singh R. Regional differences in usage of antenatal care and safe delivery services in Indonesia: findings from a nationally representative survey. *BMJ open* 2017;7(2):e013408. doi: 10.1136/bmjopen-2016-013408 [published Online First: 2017/02/06]
12. Rosário EVN, Gomes MC, Brito M, et al. Determinants of maternal health care and birth outcome in the Dande Health and Demographic Surveillance System area, Angola. *PloS one* 2019;14(8):e0221280. doi: 10.1371/journal.pone.0221280 [published Online First: 2019/08/23]
13. Aziz Ali S, Ahmed Dero A, Aziz Ali S, et al. Factors affecting the utilization of antenatal care among pregnant women: A literature review. *J Preg Neonatal Med* 2018;2(2):41-45.
14. Ribeiro ER, Guimarães AM, Bettiol H, et al. Risk factors for inadequate prenatal care use in the metropolitan area of Aracaju, Northeast Brazil. *BMC pregnancy and childbirth* 2009;9:31. doi: 10.1186/1471-2393-9-31 [published Online First: 2009/07/23]

15. Nimi T, Fraga S, Costa D, et al. Prenatal care and pregnancy outcomes: A cross-sectional study in Luanda, Angola. *International journal of gynaecology and obstetrics: the official organ of the International Federation of Gynaecology and Obstetrics* 2016;135 Suppl 1:S72-s78. doi: 10.1016/j.ijgo.2016.08.013 [published Online First: 2016/11/12]
16. Guliani H, Sepehri A, Serieux J. Determinants of prenatal care use: evidence from 32 low-income countries across Asia, Sub-Saharan Africa and Latin America. *Health policy and planning* 2014;29(5):589-602. doi: 10.1093/heapol/czt045 [published Online First: 2013/07/31]
17. Titaley CR, Dibley MJ, Roberts CL. Factors associated with underutilization of antenatal care services in Indonesia: results of Indonesia Demographic and Health Survey 2002/2003 and 2007. *BMC public health* 2010;10:485. doi: 10.1186/1471-2458-10-485 [published Online First: 2010/08/18]
18. Simkhada B, Teijlingen ER, Porter M, et al. Factors affecting the utilization of antenatal care in developing countries: systematic review of the literature. *Journal of advanced nursing* 2008;61(3):244-60. doi: 10.1111/j.1365-2648.2007.04532.x [published Online First: 2008/01/17]
19. Aliyu AA, Dahiru T. Predictors of delayed Antenatal Care (ANC) visits in Nigeria: secondary analysis of 2013 Nigeria Demographic and Health Survey (NDHS). *The Pan African medical journal* 2017;26:124. doi: 10.11604/pamj.2017.26.124.9861 [published Online First: 2017/05/24]
20. Tang X, Ding L, Feng Y, et al. Antenatal care use and its determinants among migrant women during the first delivery: a nation-wide cross-sectional study in China. *BMC pregnancy and childbirth* 2019;19(1):355-55. doi: 10.1186/s12884-019-2520-3
21. Sakeah E, Okawa S, Rexford Oduro A, et al. Determinants of attending antenatal care at least four times in rural Ghana: analysis of a cross-sectional survey. *Global health action* 2017;10(1):1291879. doi: 10.1080/16549716.2017.1291879 [published Online First: 2017/06/06]
22. Mekonnen T, Dune T, Perz J, et al. Trends and Determinants of Antenatal Care Service Use in Ethiopia between 2000 and 2016. *International journal of environmental research and public health* 2019;16(5) doi: 10.3390/ijerph16050748 [published Online First: 2019/03/06]
23. Ogbo FA, Dhama MV, Ude EM, et al. Enablers and Barriers to the Utilization of Antenatal Care Services in India. *International journal of environmental research and public health* 2019;16(17) doi: 10.3390/ijerph16173152 [published Online First: 2019/09/01]
24. El-Khatib Z, Kolawole Odusina E, Ghose B, et al. Patterns and Predictors of Insufficient Antenatal Care Utilization in Nigeria over a Decade: A Pooled Data Analysis Using Demographic and Health Surveys. *International journal of environmental research and public health* 2020;17(21) doi: 10.3390/ijerph17218261 [published Online First: 2020/11/14]
25. Asundep NN, Carson AP, Turpin CA, et al. Determinants of access to antenatal care and birth outcomes in Kumasi, Ghana. *Journal of epidemiology and global health* 2013;3(4):279-88. doi: 10.1016/j.jegh.2013.09.004 [published Online First: 2013/11/12]
26. Woldegiorgis MA, Hiller JE, Mekonnen W, et al. Disparities in maternal health services in sub-Saharan Africa. *International journal of public health* 2018;63(4):525-35. doi: 10.1007/s00038-018-1086-6 [published Online First: 2018/03/25]
27. Alam N, Hajizadeh M, Dumont A, et al. Inequalities in maternal health care utilization in sub-Saharan African countries: a multiyear and multi-country analysis. *PloS one* 2015;10(4):e0120922. doi: 10.1371/journal.pone.0120922 [published Online First: 2015/04/09]
28. United Nations (2015). Transforming our world: The 2030 agenda for sustainable development,(2019)([https://sustainable development nt.un.org/SDG](https://sustainabledevelopment.un.org/SDG), accessed 28th November,2020).
29. Owolabi OO, Wong KLM, Dennis ML, et al. Comparing the use and content of antenatal care in adolescent and older first-time mothers in 13 countries of west Africa: a cross-sectional analysis of Demographic and Health Surveys. *The Lancet Child & adolescent health* 2017;1(3):203-12. doi: 10.1016/s2352-4642(17)30025-1 [published Online First: 2018/09/01]
30. Corsi DJ, Neuman M, Finlay JE, et al. Demographic and health surveys: a profile. *International journal of epidemiology* 2012;41(6):1602-13. doi: 10.1093/ije/dys184 [published Online First: 2012/11/14]
31. Filmer D, Pritchett LH. Estimating wealth effects without expenditure data--or tears: an application to educational enrollments in states of India. *Demography* 2001;38(1):115-32. doi: 10.1353/dem.2001.0003 [published Online First: 2001/03/03]
32. Ghose B, Feng D, Tang S, et al. Women's decision-making autonomy and utilisation of maternal healthcare services: results from the Bangladesh Demographic and Health Survey. *BMJ open* 2017;7(9):e017142. doi: 10.1136/bmjopen-2017-017142 [published Online First: 2017/09/09]

- 1  
2  
3 33. Shahabuddin A, De Brouwere V, Adhikari R, et al. Determinants of institutional delivery among  
4 young married women in Nepal: Evidence from the Nepal Demographic and Health Survey,  
5 2011. *BMJ open* 2017;7(4):e012446. doi: 10.1136/bmjopen-2016-012446 [published Online First:  
6 2017/04/15]  
7  
8 34. Nyandekwe M, Nzayirambaho M, Kakoma JB. Universal health insurance in Rwanda: major  
9 challenges and solutions for financial sustainability case study of Rwanda community-based  
10 health insurance part I. *The Pan African medical journal* 2020;37:55. doi:  
11 10.11604/pamj.2020.37.55.20376 [published Online First: 2020/11/20]  
12  
13  
14  
15  
16  
17  
18  
19  
20  
21  
22  
23  
24  
25  
26  
27  
28  
29  
30  
31  
32  
33  
34  
35  
36  
37  
38  
39  
40  
41  
42  
43  
44  
45  
46  
47  
48  
49  
50  
51  
52  
53  
54  
55  
56  
57  
58  
59  
60

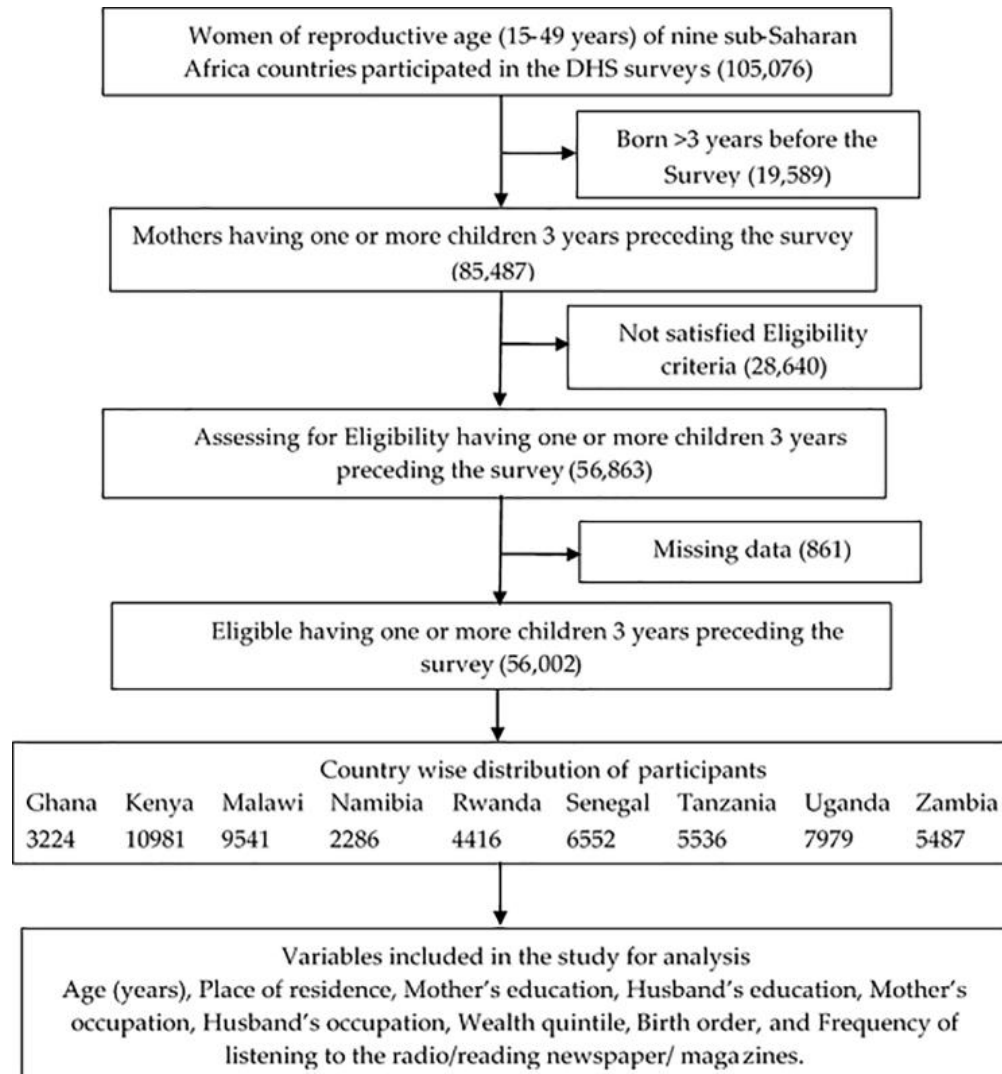

196x211mm (96 x 96 DPI)

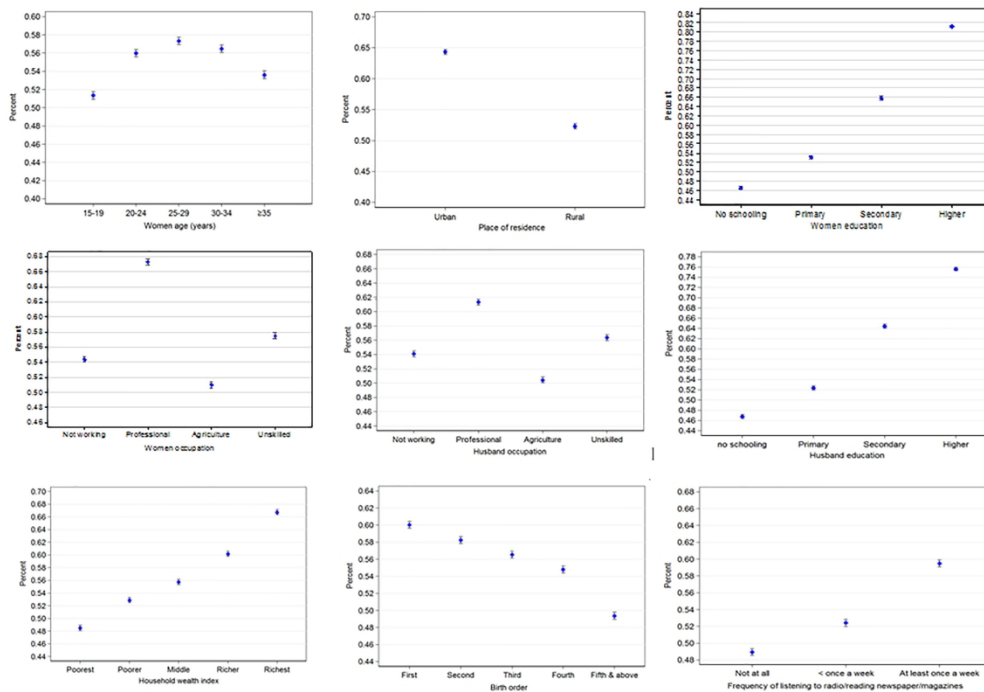

251x174mm (300 x 300 DPI)



1  
2  
3  
4  
5  
6  
7  
8  
9  
10  
11  
12  
13  
14  
15  
16  
17  
18  
19  
20  
21  
22  
23  
24  
25  
26  
27  
28  
29  
30  
31  
32  
33  
34  
35  
36  
37  
38  
39  
40  
41  
42  
43  
44  
45  
46  
47  
48  
49  
50  
51  
52  
53  
54  
55  
56  
57  
58  
59  
60

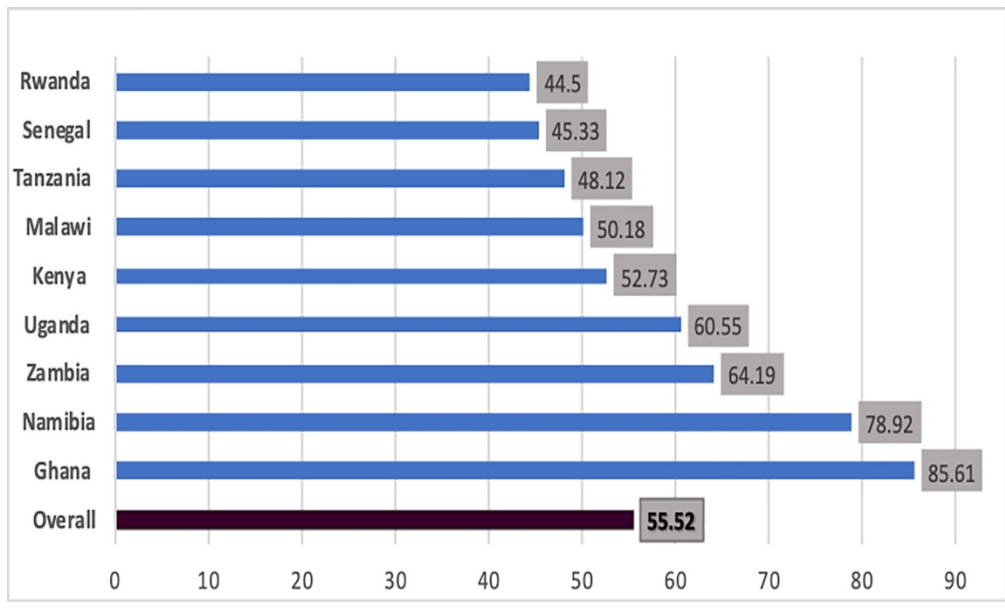

151x90mm (300 x 300 DPI)

**STROBE 2007 (v4) Statement—Checklist of items that should be included in reports of *cross-sectional studies***

| Section/Topic                | Item # | Recommendation                                                                                                                                                                       | Reported on page # |
|------------------------------|--------|--------------------------------------------------------------------------------------------------------------------------------------------------------------------------------------|--------------------|
| Title and abstract           | 1      | (a) Indicate the study's design with a commonly used term in the title or the abstract                                                                                               | 1                  |
|                              |        | (b) Provide in the abstract an informative and balanced summary of what was done and what was found                                                                                  | 2                  |
| <b>Introduction</b>          |        |                                                                                                                                                                                      |                    |
| Background/rationale         | 2      | Explain the scientific background and rationale for the investigation being reported                                                                                                 | 3-4                |
| Objectives                   | 3      | State specific objectives, including any prespecified hypotheses                                                                                                                     | 4                  |
| <b>Methods</b>               |        |                                                                                                                                                                                      |                    |
| Study design                 | 4      | Present key elements of study design early in the paper                                                                                                                              | 5                  |
| Setting                      | 5      | Describe the setting, locations, and relevant dates, including periods of recruitment, exposure, follow-up, and data collection                                                      | 5                  |
| Participants                 | 6      | (a) Give the eligibility criteria, and the sources and methods of selection of participants                                                                                          | 6                  |
| Variables                    | 7      | Clearly define all outcomes, exposures, predictors, potential confounders, and effect modifiers. Give diagnostic criteria, if applicable                                             | 6                  |
| Data sources/<br>measurement | 8*     | For each variable of interest, give sources of data and details of methods of assessment (measurement). Describe comparability of assessment methods if there is more than one group | -                  |
| Bias                         | 9      | Describe any efforts to address potential sources of bias                                                                                                                            | 6                  |
| Study size                   | 10     | Explain how the study size was arrived at                                                                                                                                            | 5-6                |
| Quantitative variables       | 11     | Explain how quantitative variables were handled in the analyses. If applicable, describe which groupings were chosen and why                                                         | 7                  |
| Statistical methods          | 12     | (a) Describe all statistical methods, including those used to control for confounding                                                                                                | 7-8                |
|                              |        | (b) Describe any methods used to examine subgroups and interactions                                                                                                                  | 7-8                |
|                              |        | (c) Explain how missing data were addressed                                                                                                                                          | 6                  |
|                              |        | (d) If applicable, describe analytical methods taking account of sampling strategy                                                                                                   | 7                  |
|                              |        | (e) Describe any sensitivity analyses                                                                                                                                                | -                  |

|                          |     |                                                                                                                                                                                                              |        |
|--------------------------|-----|--------------------------------------------------------------------------------------------------------------------------------------------------------------------------------------------------------------|--------|
| <b>Results</b>           |     |                                                                                                                                                                                                              |        |
| Participants             | 13* | (a) Report numbers of individuals at each stage of study—eg numbers potentially eligible, examined for eligibility, confirmed eligible, included in the study, completing follow-up, and analysed            | -      |
|                          |     | (b) Give reasons for non-participation at each stage                                                                                                                                                         | -      |
|                          |     | (c) Consider use of a flow diagram                                                                                                                                                                           | 6      |
| Descriptive data         | 14* | (a) Give characteristics of study participants (eg demographic, clinical, social) and information on exposures and potential confounders                                                                     | 8-9    |
|                          |     | (b) Indicate number of participants with missing data for each variable of interest                                                                                                                          | 11-13  |
| Outcome data             | 15* | Report numbers of outcome events or summary measures                                                                                                                                                         | 13     |
| Main results             | 16  | (a) Give unadjusted estimates and, if applicable, confounder-adjusted estimates and their precision (eg, 95% confidence interval). Make clear which confounders were adjusted for and why they were included | 13- 21 |
|                          |     | (b) Report category boundaries when continuous variables were categorized                                                                                                                                    | 11-14  |
|                          |     | (c) If relevant, consider translating estimates of relative risk into absolute risk for a meaningful time period                                                                                             | -      |
| Other analyses           | 17  | Report other analyses done—eg analyses of subgroups and interactions, and sensitivity analyses                                                                                                               | -      |
| <b>Discussion</b>        |     |                                                                                                                                                                                                              |        |
| Key results              | 18  | Summarise key results with reference to study objectives                                                                                                                                                     | 22     |
| Limitations              | 19  | Discuss limitations of the study, taking into account sources of potential bias or imprecision. Discuss both direction and magnitude of any potential bias                                                   | 22-23  |
| Interpretation           | 20  | Give a cautious overall interpretation of results considering objectives, limitations, multiplicity of analyses, results from similar studies, and other relevant evidence                                   | 23-25  |
| Generalisability         | 21  | Discuss the generalisability (external validity) of the study results                                                                                                                                        | 22-23  |
| <b>Other information</b> |     |                                                                                                                                                                                                              |        |
| Funding                  | 22  | Give the source of funding and the role of the funders for the present study and, if applicable, for the original study on which the present article is based                                                | NA     |

\*Give information separately for cases and controls in case-control studies and, if applicable, for exposed and unexposed groups in cohort and cross-sectional studies.

**Note:** An Explanation and Elaboration article discusses each checklist item and gives methodological background and published examples of transparent reporting. The STROBE checklist is best used in conjunction with this article (freely available on the Web sites of PLoS Medicine at <http://www.plosmedicine.org/>, Annals of Internal Medicine at <http://www.annals.org/>, and Epidemiology at <http://www.epidem.com/>). Information on the STROBE Initiative is available at [www.strobe-statement.org](http://www.strobe-statement.org).

# BMJ Open

## Determinants of Antenatal care use in nine sub-Saharan Africa countries: A statistical analysis of cross-sectional data from Demographic and Health Surveys

|                                 |                                                                                                                                                                                                                                                                                                                                                                                                                                                                                                                              |
|---------------------------------|------------------------------------------------------------------------------------------------------------------------------------------------------------------------------------------------------------------------------------------------------------------------------------------------------------------------------------------------------------------------------------------------------------------------------------------------------------------------------------------------------------------------------|
| Journal:                        | <i>BMJ Open</i>                                                                                                                                                                                                                                                                                                                                                                                                                                                                                                              |
| Manuscript ID                   | bmjopen-2021-051675.R2                                                                                                                                                                                                                                                                                                                                                                                                                                                                                                       |
| Article Type:                   | Original research                                                                                                                                                                                                                                                                                                                                                                                                                                                                                                            |
| Date Submitted by the Author:   | 18-Jan-2022                                                                                                                                                                                                                                                                                                                                                                                                                                                                                                                  |
| Complete List of Authors:       | Andegiorgish, Amanuel; Xi'an Jiaotong University, Department of Epidemiology & Biostatistics; Asmara College of Health Sciences, Epidemiology & Biostatistics<br>ELHOUMED, Mohamed; Xi'an Jiaotong University, Department of Epidemiology and Biostatistics<br>Qi, Qi; Xi'an Jiaotong University, Department of Epidemiology and Biostatistics<br>Zhu, Zhonghai; Xi'an Jiaotong University, Department of Epidemiology and Biostatistics<br>Zeng, L; Xi'an Jiaotong University, Department of Epidemiology and Biostatistics |
| <b>Primary Subject Heading</b>: | Epidemiology                                                                                                                                                                                                                                                                                                                                                                                                                                                                                                                 |
| Secondary Subject Heading:      | Health policy, Epidemiology, Public health                                                                                                                                                                                                                                                                                                                                                                                                                                                                                   |
| Keywords:                       | Health policy < HEALTH SERVICES ADMINISTRATION & MANAGEMENT, Community child health < PAEDIATRICS, Prenatal diagnosis < OBSTETRICS, EPIDEMIOLOGY                                                                                                                                                                                                                                                                                                                                                                             |
|                                 |                                                                                                                                                                                                                                                                                                                                                                                                                                                                                                                              |

SCHOLARONE™  
Manuscripts



I, the Submitting Author has the right to grant and does grant on behalf of all authors of the Work (as defined in the below author licence), an exclusive licence and/or a non-exclusive licence for contributions from authors who are: i) UK Crown employees; ii) where BMJ has agreed a CC-BY licence shall apply, and/or iii) in accordance with the terms applicable for US Federal Government officers or employees acting as part of their official duties; on a worldwide, perpetual, irrevocable, royalty-free basis to BMJ Publishing Group Ltd ("BMJ") its licensees and where the relevant Journal is co-owned by BMJ to the co-owners of the Journal, to publish the Work in this journal and any other BMJ products and to exploit all rights, as set out in our [licence](#).

The Submitting Author accepts and understands that any supply made under these terms is made by BMJ to the Submitting Author unless you are acting as an employee on behalf of your employer or a postgraduate student of an affiliated institution which is paying any applicable article publishing charge ("APC") for Open Access articles. Where the Submitting Author wishes to make the Work available on an Open Access basis (and intends to pay the relevant APC), the terms of reuse of such Open Access shall be governed by a Creative Commons licence – details of these licences and which [Creative Commons](#) licence will apply to this Work are set out in our licence referred to above.

Other than as permitted in any relevant BMJ Author's Self Archiving Policies, I confirm this Work has not been accepted for publication elsewhere, is not being considered for publication elsewhere and does not duplicate material already published. I confirm all authors consent to publication of this Work and authorise the granting of this licence.

1  
2  
3 **Determinants of Antenatal care use in nine sub-Saharan Africa countries: A**  
4  
5 **statistical analysis of cross-sectional data from Demographic and Health Surveys**  
6  
7

8 **Amanuel kidane Andegiorgish**<sup>1,2</sup>, **Mohamed Elhoumed**<sup>1,3</sup>, **Qi Qi**<sup>1</sup>, **Zhonghai**  
9  
10 **Zhu**<sup>1</sup> and **Lingxia Zeng**<sup>1</sup> \*

11  
12  
13 <sup>1</sup> Department of Epidemiology and Biostatistics, School of Public Health, Xi'an  
14  
15 Jiaotong University Health Science Center, No 76 West Yanta Road, Xi'an  
16  
17 710061, Shaanxi Province, People's Republic of China

18  
19  
20 <sup>2</sup> Department of Epidemiology and Biostatistics, Asmara College of Health  
21  
22 Sciences, School of Public Health, P.O.Box 8566, Asmara, Eritrea

23  
24  
25 <sup>3</sup> National Institute of Public Health Research (INRSP), BP. 695, Nouakchott,  
26  
27 Mauritania

28  
29 \* Correspondence: Lingxia Zeng; [tjzlx@mail.xjtu.edu.cn](mailto:tjzlx@mail.xjtu.edu.cn)  
30  
31

32  
33 **Abstract:**

34  
35 **Objective:** To explore the factors associated with antenatal care visits.

36 **Design:** A secondary data analysis from cross-sectional studies was conducted.

37 **Setting:** Sub-Saharan Africa

38 **Participants:** 56002 women aged 15-49 years; Ghana(3224), Kenya(10981),  
39 Malawi(9541), Namibia(2286), Rwanda(4416), Senegal(6552), Tanzania(5536),  
40 Uganda(7979), and Zambia(5487) were analyzed.

41 **Outcomes:** 4<sup>+</sup>ANC visits

42 **Results:** Overall 55.52% (95% CI; 55.11, 55.93) of women made 4<sup>+</sup>ANC visits. The  
43 highest 4<sup>+</sup>ANC visits were in Ghana (85.6%) and Namibia (78.9%), and the lowest  
44 were in Senegal (45.3%) and Rwanda (44.5%). Young women 15-19 years had the  
45 lowest uptake of 4<sup>+</sup>ANCs. Multivariable analysis indicated that, the odds of 4<sup>+</sup>ANC  
46 visits were 14% lower among women from rural areas compared to those living in  
47 towns (AOR, 0.86; 95% CI: 0.81, 0.91). This difference was significant in Kenya,  
48 Malawi, Senegal and Zambia. However, in Zambia the odds of 4<sup>+</sup>ANC visits was  
49 48% higher (AOR, 1.48; 95% CI: 1.2, 1.82) among women from rural compared to  
50 urban areas. Women with higher educational level had more than two-fold higher  
51 odds of 4<sup>+</sup>ANC visits in seven of the nine countries, and was significant in Kenya,  
52 Malawi, Rwanda, and Zambia. Compared to the poorest household wealth category,  
53 odds of 4<sup>+</sup>ANC visits increased by 12 %, 18%, 32%, and 41% for every 20%  
54 variation on the wealth quantile. Women in their first-time pregnancy had higher odds  
55 of 4<sup>+</sup>ANC visits compared to others across all countries and women who had access  
56 to media at least once-a-week had a 22% higher probability of 4<sup>+</sup>ANC visits than  
57 women who had no access to media (AOR, 1.22, 95%CI; 1.15,1.29).  
58  
59  
60

1  
2  
3 **Conclusion:** The number of ANC visits was considered to be inadequate with  
4 substantial variation among the studied countries. Comprehensive interventions on  
5 scaling up-take of ANC is needed among the low performing countries. Particular  
6 attention should be given to women of low economic status, and rural residents.  
7

8  
9 **Keywords:** Four or more antenatal care, Determinants, sub-Saharan Africa,  
10  
11 Demographic health survey, and health service utilization.  
12

### 13 **Strengths and limitations of this study**

- 14  
15  The analytical approach both as pooled data support the outcome to be valid  
16 and the merit in segregating data allows to focus on aspects of ANC visits that  
17 may remain hidden in intra-national/national level indicators
- 18  
19  The study used national representative samples from nine sub-Saharan Africa  
20 countries which have been linked to enhance the generalizability of the study
- 21  
22  This analysis included women who have birth three years before the survey,  
23 which could minimize the recall bias of self-report at a single point in time
- 24  
25  The cross-sectional nature of the study design cannot affirm the cause-effect  
26 or direction of association of the predictors.
- 27  
28  Since the data sets were obtained from countries DHS in a different time,  
29 awareness of participants may be varied due to time heterogeneity  
30  
31

### 32 **Introduction**

33  
34  
35 Maternal and neonatal mortality is a significant public health issue that reflects  
36 the overall status of a country's healthcare system and socioeconomic development<sup>1</sup>.  
37  
38 The World Health Organization (WHO) estimates that approximately 830 maternal  
39 deaths/day from preventable causes are related to pregnancy and childbirth. Almost  
40 all (99%) of these deaths occur in low-income countries <sup>2</sup>. Sub-Saharan Africa (SSA)  
41 remains the region with the highest maternal and under-five mortality <sup>3-5</sup>. Almost half  
42 of the under-five deaths occur among new-born babies whose deaths could be  
43 prevented by reaching a high coverage of quality antenatal care, skilled care at birth,  
44 postnatal care for mother and baby, and care of small and sick new-borns <sup>3 4</sup>. Several  
45 review studies on interventions for maternal and new-born babies have demonstrated  
46 that the provision of adequate antenatal care (ANC) brings with it a positive impact on  
47  
48  
49  
50  
51  
52  
53  
54  
55  
56  
57  
58  
59  
60

1  
2  
3 pregnancy outcomes, through early diagnosis and appropriate management. ANC has  
4  
5 a 39% reduced risk of neonatal mortality in sub-Saharan countries <sup>6-9</sup>.

6  
7  
8 The WHO advises every pregnant woman with a normal pregnancy in middle-  
9  
10 and low-income countries to attend at least four ANC's <sup>1</sup>. However, many women in  
11  
12 low income countries particularly in SSA have limited access to health providers <sup>10</sup>.  
13  
14 Several studies have attempted to identify the factors associated with the under-  
15  
16 utilization of ANC's <sup>11 12</sup>. Age <sup>12-16</sup>, women's education <sup>8 12-24</sup>, husbands' education <sup>18</sup>  
17  
18 <sup>22 23</sup>, socioeconomic status <sup>14-23 25</sup>, women's employment <sup>18</sup>, birth order <sup>11 12 18</sup>,  
19  
20 frequency of listening to the radio/watching TV/reading newspaper/ magazines <sup>8 11 18</sup>  
21  
22 <sup>23 24</sup>, and place of residence <sup>12 13 16-19 22 24 25</sup> are among the factors associated with  
23  
24 under-utilization of ANC. The factors attributed to inadequate ANC follow-ups are  
25  
26 quite substantial across regions and countries <sup>11 16 23 26 27</sup>.

27  
28  
29  
30 Meeting Sustainable Development Goals (SDGs) to ensure healthy lives and  
31  
32 well-being for all ages by 2030 requires transnational organizations' efforts and the  
33  
34 ability to collaborate in partnership. Interestingly, the means of implementing and  
35  
36 revitalizing capacity development and the information exchange of multinational co-  
37  
38 operation have been emphasized in the SDGs <sup>28</sup>. Despite the available evidence on  
39  
40 ANC's key role in reducing maternal and neonatal mortality, millions of women in  
41  
42 developing countries do not receive it and there remains a high variability (32%-91%)  
43  
44 of four or more ANC (4+ANC ) visits between countries <sup>21 22 24 29</sup>. Lessons on  
45  
46 coverage of crucial ANC's from neighboring areas would aid in precise allocations of  
47  
48 resources and interventions where they are most needed. Therefore, new research  
49  
50 projects on mutual benefit and knowledge sharing at every level must be implemented  
51  
52 to attain global health development goals.

53  
54  
55 We conducted secondary data analysis using the latest (2013-2019) Standard  
56  
57 Demographic Health Surveys conducted in nine sub-Saharan Africa countries (Ghana,  
58  
59  
60



1  
2  
3 Kenya, Malawi, Namibia, Senegal, Rwanda, Tanzania, Uganda, and Zambia). The  
4  
5 objective of the study was to understand the factors associated with 4<sup>+</sup>ANC  
6  
7 attendance.  
8  
9

## 10 **Materials and Methods**

### 11 **Study design**

12  
13  
14  
15  
16  
17 We used data from the Demographic and Health Survey (DHS). DHS is a five-  
18  
19 year periodic national representative cross-sectional study using a stratified two-stage  
20  
21 cluster sampling design. Details of the DHS protocol are published elsewhere <sup>30</sup>.  
22  
23 Information from ever-married women aged 15-49 years in nine sub-Saharan Africa  
24  
25 countries on demographic characteristics and reproductive history were collected.  
26  
27  
28

### 29 **Data sources/ measurements**

30  
31  
32 Data sets were collected through household interviews using a structured  
33  
34 questionnaire. Women were interviewed about the number of ANC visits. Trained  
35  
36 interviewers obtained informed consent from all eligible women in selected  
37  
38 households before conducting the interview using pencil and paper questionnaires.  
39  
40 The surveys are weighted for over or under-sampling and non-response. Thus, the  
41  
42 design and standardized core modules allow for regional and transnational  
43  
44 comparison of the data. Field supervisors and data clerks checked all forms before  
45  
46 entering them into databases. Data for this analysis was taken from the latest  
47  
48 household survey of the studied countries. This study's survey years ranged from 2013  
49  
50  
51 to 2019, and the sample size ranges from 2,286 in Namibia to 10,981 in Kenya.  
52  
53  
54  
55  
56  
57

58 Countries were selected based on the availability of recent standard DHS data  
59  
60 after 2010 and representing the four different sub-regions of the Sub-Saharan Africa,  
i.e. Western, Central, Southern, and Eastern Africa. The nine countries included in

1  
2  
3 this analysis and their year of survey are; Ghana (DHS 2014), Kenya (DHS 2014)  
4  
5 Malawi (DHS 2015/2016), Namibia (DHS 2013), Rwanda (DHS 2014/2015) Senegal  
6  
7 (DHS 2017), Tanzania (DHS 2015/2016), Uganda (DHS 2016) and Zambia (DHS  
8  
9 2018/2019).

### 13 **Participants**

16 Women who had one or more births three years before the survey were included  
17  
18 as study participants. Selection criteria of study participants was as shown in (Figure-  
19  
20 1). In the DHS survey, information about antenatal care is only collected for the  
21  
22 youngest child under-five years. Therefore, to minimize the degree of error due to  
23  
24 recall bias (because in some countries information about ANC visits are subjective  
25  
26 from the mother while others check an ANC card), we have limited our analysis to  
27  
28 those births that occurred three years before the survey. The contribution of study  
29  
30 participants is presented in Figure 1.

### 34 **Exclusion criteria**

37 ANC provided by non-health professionals such as traditional birth attendants  
38  
39 were excluded from the present analysis.

### 41 **Outcome variable**

44 We used antenatal care visits as our primary outcome. We categorized this  
45  
46 variable into a binary variable as 4+ANC visits 'yes' =if the mother had at least four  
47  
48 ANC visits and 'no' = if the mother had less than four ANC visits during her last  
49  
50 pregnancy.  
51

### 54 **Explanatory variables**

57 A set of sociodemographic variables related to the utilization of ANC such as  
58  
59 women's age in years, women and husbands education and occupation, birth order  
60  
(parity), frequency of listening to radio/ watching TV/ reading magazines, household

1  
2  
3 wealth quantile, and place of residence were identified from the survey data as  
4  
5 predictors of ANC follow-ups.  
6

7  
8 We adapted Anderson's behavioral model framework on factors associated with  
9  
10 utilization of medical care service in developing countries which has been applied in  
11  
12 similar studies <sup>17</sup>. Variables with missing values (>10%) on enabling and need factors  
13  
14 were excluded from the analysis due to limited representativeness.  
15

16  
17 Numerical values like age, ANC visits, and years of education attended were  
18  
19 grouped into categories. Women's age in years was tabulated into groups (15-19-  
20  
21 year, 20-24-year, 25-29-year, 30-34 year, 35 and above), women's and husbands'  
22  
23 education were classified as 'no schooling', 'primary', 'secondary', and 'higher'  
24  
25 education. Women's and husband's occupation were classified as 'not working  
26  
27 outside home', 'professional/skilled work', 'agriculture', and 'unskilled'. Frequency  
28  
29 of listening to radio/ watching TV/ reading magazines (not at all, less than once a  
30  
31 week, and at least once a week) was included to gauge the women's exposure to  
32  
33 promotion messages on the benefits of ANC attendance. The household wealth index  
34  
35 was constructed using principal component analysis from items related to possession  
36  
37 of durable assets, access to utilities and infrastructure, and housing characteristics.  
38  
39 Each woman was ranked into five categories (poorest, poorer, middle, richer, and  
40  
41 richest) based on a household asset score, comprising 20% of the population <sup>11 31</sup>.  
42  
43 Place of residence/ ecological status identified from the survey assessed the difference  
44  
45 in the availability and accessibility of services among urban and rural areas and were  
46  
47 used as predictors of ANC follow-up.  
48  
49  
50  
51  
52

### 53 54 55 **Data analysis**

56  
57 Data analysis was performed using STATA software version 14.0. Descriptive  
58  
59 analysis was conducted on combined and separate forms for the studied country. Chi-  
60  
square tests were used to analyze the potential factors affecting ANC use during a

womans last pregnancy three years before the survey. Bivariate and multivariable regression was used to study the statistical association between the explanatory variables and 4+ANC. A multi-level analysis was used in which the level of coefficients was modeled as a function of predictors considering the average log odds of 4+ANC across the studied countries. Women's age at childbirth and husband's occupation were excluded from the multilevel analysis due to collinearity effects with a variance inflation factor value ( $VIF > 4$ ) on the collinearity diagnosis test. A two-sided P-value  $< 0.05$  was considered statistically significant in this study.

### **Patient and public involvement**

The study used publicly available secondary data from DHS (<https://dhsprogram.com/>). Patients and public were not involved in the design and conduct of this research.

## **Results**

### **Baseline characteristics of the study population**

A total of 56,002 women with complete details from nine SSA countries were available. The distribution of study participants is presented in Figure 1. Sixty one percent of the participant women were less than 30 years old and about three-fourths (73.2%) of the total were from rural places of residence. Rates of illiteracy in the studied countries was high. More than one-fifth (22.5%) of all women or their husbands had no schooling. More women (51.2%) had a primary level of education than their husbands (44.8%); whilst women's unemployment status (no working outside home) was higher than their husband's (31.5% vs 4.2%). More than a quarter (27.3%) of all households were in the lowest (poorest) wealth quantile and 24% of the women were having their first child (primigravidae) (Table 1).

Overall, 55.52% (95% CI; 55.11,55.93) of the women had at least four ANC visits with a skilled health provider during pregnancy. Thirty-five percent of the

1  
2  
3 women started their first ANC visit in the 1<sup>st</sup> trimester and 57% in the 2<sup>nd</sup> trimester of  
4 pregnancy. Before pregnancy, 82.2% of women in this study had received a tetanus  
5 injection. There were 1,808 deaths (32.3 deaths/ 1000 live births) among new-borns in  
6 the three years preceding the survey.  
7  
8  
9  
10

11  
12 The highest proportion of 4<sup>+</sup>ANC visits among the studied countries was from  
13 Ghana (85.61%) followed by Namibia (78.92%), and Zambia (64.2%), and the lowest  
14 proportion was from Rwanda (44.5%), Senegal (45.3%), and Tanzania (48.1%)  
15 (Figure 2 online).  
16  
17  
18  
19  
20

21 Pooled data (Figure 3) illustrates that the highest proportion (57.3%) of 4<sup>+</sup>ANC  
22 visits was among 25-29 years old women. Women from an urban place of residence  
23 accounted for 64.3% of 4<sup>+</sup>ANC visits. There was an increased proportion of 4<sup>+</sup>ANC  
24 visits with an increase in women's educational level, husbands educational level,  
25 household wealth status, and access to radio listening/watching TV/reading  
26 newspapers or magazines. The proportion of 4<sup>+</sup>ANC visits decreased with an increase  
27 in birth order. There was no clear pattern in the association of 4<sup>+</sup>ANC visits on  
28 women and husband occupation levels, albeit professionals in both groups were  
29 higher.  
30  
31  
32  
33  
34  
35  
36  
37  
38  
39  
40  
41  
42

### 43 **Determinants of four or more antenatal care visits**

44  
45  
46 Table 1 indicates that women aged 25-29 years attended more ANC across all the  
47 studied countries ( $p < 0.005$ ), except in Zambia ( $p = 0.361$ ). Similarly, women from an  
48 urban place of residence had a higher number of ANC visits than women from rural  
49 areas ( $p < 0.001$ ), except in Rwanda ( $p = 0.788$ ). In Zambia women from rural areas had  
50 higher 4<sup>+</sup>ANC visits ( $p < 0.001$ ). Table 1 shows that women's and husbands' education  
51 level significantly ( $p < 0.001$ ) increased women utilization of ANC across all the  
52 studied countries. The highest 4<sup>+</sup>ANC attendance was among women and husbands  
53 with highest educational level in Ghana, (99.2% and 96.4% respectively), and the  
54  
55  
56  
57  
58  
59  
60

1  
2  
3 lowest was among women of no schooling in Rwanda (37.6%) and Tanzania (38.6%),  
4  
5 and husbands with no schooling in Tanzania (36.3%).  
6  
7

8 Occupational status of women and their husbands was associated ( $p<0.001$ ) with  
9  
10 women's 4<sup>+</sup>ANC attendance across all countries except in Rwanda ( $p=0.493$ ) and  
11  
12 Zambia ( $p=0.062$ ) where the husband's occupation had no association with women's  
13  
14 4<sup>+</sup>ANC visits.  
15  
16

17 Household wealth status (wealth quantile) was significantly associated with  
18  
19 4<sup>+</sup>ANC visits ( $p<0.001$ ). As the household wealth status increased, the usage of  
20  
21 4<sup>+</sup>ANC visits increased across all countries except in Rwanda ( $p=0.234$ ). With the  
22  
23 exception of Malawi ( $p=0.383$ ) most primigravidae women undertook more ANC  
24  
25 visits than multi-parous women ( $p<0.001$ ).  
26  
27

28 More than one in four (27.54%) of the participant women had no access to  
29  
30 radio/TV/newspapers or magazine whilst 53% had access to these media at least once  
31  
32 a week. Increasing access to media was significantly associated with 4<sup>+</sup>ANC  
33  
34 attendance ( $p<0.001$ ), although in Rwanda and Zambia the association was not  
35  
36 significant ( $p=0.147$  and  $p=0.264$  respectively).  
37  
38  
39  
40  
41  
42  
43  
44  
45  
46  
47  
48  
49  
50  
51  
52  
53  
54  
55  
56  
57  
58  
59  
60

Table 1. Sociodemographic characteristics influencing 4+ANC visits in nine sub-Saharan countries.

| Variables            |                           | Ghana        | Kenya       | Malawi      | Namibia     | Rwanda      | Senegal     | Tanzania    | Uganda      | Zambia      |
|----------------------|---------------------------|--------------|-------------|-------------|-------------|-------------|-------------|-------------|-------------|-------------|
| N (%)                |                           | 3,224        | 10,981      | 9,541       | 2,286       | 4,416       | 6,552       | 5,536       | 7,979       | 5,487       |
| Age group            |                           |              |             |             |             |             |             |             |             |             |
|                      | 15-19                     | 5084(9.08)   | 140(79.1)   | 399(47.11)  | 470(43.93)  | 153(66.81)  | 59(40.14)   | 232(40.00)  | 252(47.10)  | 430(62.05)  |
|                      | 20-24                     | 14930(26.66) | 519(84.12)  | 1547(54.05) | 1461(48.62) | 487(78.30)  | 427(45.77)  | 743(47.08)  | 718(49.42)  | 989(65.63)  |
|                      | 25-29                     | 14168(25.30) | 722(87.73)  | 1782(55.02) | 1115(52.01) | 463(81.66)  | 597(47.76)  | 791(46.67)  | 659(50.89)  | 1213(62.78) |
|                      | 30-34                     | 10804(19.29) | 636(86.53)  | 1080(52.81) | 902(52.78)  | 334(82.47)  | 483(43.59)  | 595(46.09)  | 491(48.76)  | 924(61.52)  |
|                      | 35 and above              | 11016(19.67) | 743(85.21)  | 982(49.40)  | 840(52.08)  | 367(79.27)  | 399(40.80)  | 609(43.25)  | 544(43.66)  | 753(54.33)  |
|                      | p-value                   |              | 0.029       | < 0.001     | < 0.001     | < 0.001     | 0.012       | 0.014       | 0.004       | < 0.001     |
| Place of residence   |                           |              |             |             |             |             |             |             |             |             |
|                      | Urban                     | 15024(26.83) | 1207(91.72) | 2228(61.28) | 892(57.92)  | 853(82.66)  | 442(44.87)  | 1188(60.00) | 816(60.53)  | 1009(67.90) |
|                      | Rural                     | 40978(73.17) | 1553(81.39) | 3562(48.50) | 3896(48.69) | 951(75.84)  | 1523(44.39) | 1782(38.98) | 1848(44.13) | 3822(58.86) |
|                      | p-value                   |              | < 0.001     | < 0.001     | < 0.001     | < 0.001     | 0.788       | < 0.001     | < 0.001     | < 0.001     |
| Women's education    |                           |              |             |             |             |             |             |             |             |             |
|                      | No schooling              | 12589(22.48) | 846(79.21)  | 916(40.75)  | 494(45.78)  | 106(58.56)  | 228(37.62)  | 1982(41.28) | 421(38.62)  | 535(55.15)  |
|                      | Primary                   | 28673(51.20) | 544(82.42)  | 2884(50.67) | 3124(49.15) | 367(71.40)  | 1397(44.53) | 677(54.51)  | 1557(46.91) | 2872(58.18) |
|                      | Secondary                 | 12703(22.68) | 1242(90.86) | 1380(60.50) | 1038(53.73) | 1229(82.82) | 257(45.73)  | 291(60.00)  | 643(59.76)  | 1072(66.46) |
|                      | Higher                    | 2037(3.64)   | 128(99.22)  | 610(80.26)  | 132(75.86)  | 102(95.33)  | 83(74.77)   | 20(83.33)   | 43(84.31)   | 352(76.52)  |
|                      | p-value                   |              | < 0.001     | < 0.001     | < 0.001     | < 0.001     | < 0.001     | < 0.001     | < 0.001     | < 0.001     |
| Husband's education  |                           |              |             |             |             |             |             |             |             |             |
|                      | No schooling              | 9368(22.53)  | 699(79.16)  | 344(40.23)  | 348(48.07)  | 123(65.78)  | 248(40.52)  | 1900(40.85) | 234(36.34)  | 324(58.70)  |
|                      | Primary                   | 18618(44.78) | 292(83.67)  | 1172(51.38) | 2068(48.72) | 174(73.73)  | 1267(45.66) | 362(55.69)  | 1341(45.66) | 2057(57.54) |
|                      | Secondary                 | 10968(26.38) | 1245(88.61) | 727(60.43)  | 1314(52.86) | 522(82.08)  | 172(44.33)  | 273(62.19)  | 521(59.68)  | 1114(65.38) |
|                      | Higher                    | 2624(6.31)   | 267(96.39)  | 347(73.83)  | 252(67.56)  | 83(96.51)   | 95(62.91)   | 84(68.29)   | 75(69.44)   | 508(73.62)  |
|                      | p-value                   |              | < 0.001     | < 0.001     | < 0.001     | < 0.001     | < 0.001     | < 0.001     | < 0.001     | < 0.001     |
| Women's occupation   |                           |              |             |             |             |             |             |             |             |             |
|                      | Not working O/H           | 15820(31.48) | 519(81.99)  | 1012(50.40) | 1457(48.47) | 969(74.65)  | 130(40.12)  | 1654(45.23) | 543(52.92)  | 760(56.55)  |
|                      | Professional/Skilled work | 9222(18.35)  | 1375(91.18) | 305(70.28)  | 579(55.94)  | 558(84.67)  | 336(49.19)  | 656(52.27)  | 261(65.91)  | 1468(64.84) |
|                      | Agriculture               | 18823(37.45) | 786(78.52)  | 632(49.11)  | 2031(49.61) | 40(86.96)   | 1428(44.47) | 377(33.87)  | 1247(41.58) | 2099(57.90) |
|                      | Unskilled                 | 6392(12.72)  | 73(97.33)   | 859(56.03)  | 721(51.28)  | 233(83.51)  | 71(36.04)   | 279(53.55)  | 613(54.98)  | 498(67.30)  |
|                      | p-value                   |              | < 0.001     | < 0.001     | < 0.001     | < 0.001     | 0.003       | < 0.001     | < 0.001     | 0.001       |
| Husband's occupation |                           |              |             |             |             |             |             |             |             |             |
|                      | Not working O/H           | 1744(4.17)   | -           | 44(51.76)   | 380(49.74)  | 8(88.89)    | 12(50.00)   | 82(49.70)   | 16(38.10)   | 134(59.03)  |
|                      | Professional/Skilled work | 14721(35.22) | 1024(92.42) | 777(62.26)  | 1241(53.84) | 459(83.91)  | 516(45.03)  | 1412(51.22) | 600(57.58)  | 2091(65.53) |
|                      | Agriculture               | 16758(40.09) | 1065(78.54) | 556(44.91)  | 1446(49.25) | 117(68.02)  | 1082(46.16) | 726(34.00)  | 1096(41.66) | 1327(55.36) |
|                      | Unskilled                 | 8579(20.52)  | 433(91.54)  | 1199(54.01) | 920(49.78)  | 180(81.45)  | 180(42.35)  | 445(48.74)  | 467(54.75)  | 521(62.40)  |
|                      | p-value                   |              | < 0.001     | 0.006       | < 0.001     | < 0.001     | 0.493       | < 0.001     | < 0.001     | 0.062       |
| Wealth quintile      |                           |              |             |             |             |             |             |             |             |             |

|                                                                             |                       |              |             |             |             |             |             |             |             |             |             |
|-----------------------------------------------------------------------------|-----------------------|--------------|-------------|-------------|-------------|-------------|-------------|-------------|-------------|-------------|-------------|
|                                                                             | Poorest               | 15283(27.29) | 817(78.78)  | 1532(41.79) | 1002(46.32) | 369(73.51)  | 444(41.73)  | 634(31.51)  | 457(37.71)  | 1152(54.78) | 1003(65.13) |
|                                                                             | Poorer                | 12308(21.98) | 577(81.96)  | 1130(49.71) | 1022(48.83) | 351(74.05)  | 409(45.14)  | 706(40.88)  | 450(40.50)  | 1020(58.42) | 842(66.09)  |
|                                                                             | Middle                | 10560(18.86) | 495(86.09)  | 1011(55.10) | 888(48.05)  | 388(79.51)  | 377(46.60)  | 660(49.14)  | 481(44.87)  | 893(60.13)  | 692(62.62)  |
|                                                                             | Richer                | 9452(16.88)  | 474(94.23)  | 1007(60.55) | 887(50.63)  | 401(82.51)  | 355(45.87)  | 561(61.58)  | 666(55.64)  | 863(64.26)  | 473(57.47)  |
|                                                                             | Richest               | 8399(15.00)  | 397(98.02)  | 1110(71.15) | 989(58.69)  | 295(87.80)  | 380(44.03)  | 409(73.17)  | 610(64.62)  | 903(69.35)  | 512(68.72)  |
|                                                                             | p-value               |              | < 0.001     | < 0.001     | < 0.001     | < 0.001     | 0.234       | < 0.001     | < 0.001     | < 0.001     | < 0.001     |
| Birth order                                                                 | First                 | 13434(23.99) | 636(87.60)  | 1471(59.80) | 1267(51.23) | 594(79.41)  | 613(50.16)  | 718(52.33)  | 766(56.70)  | 1077(63.73) | 918(65.95)  |
|                                                                             | Second                | 11333(20.24) | 584(89.30)  | 1345(57.45) | 941(48.26)  | 469(81.42)  | 502(46.83)  | 585(50.39)  | 538(51.88)  | 953(63.87)  | 684(65.14)  |
|                                                                             | Third                 | 8927(15.94)  | 470(85.77)  | 1019(54.40) | 798(50.41)  | 309(84.43)  | 322(45.61)  | 448(45.16)  | 395(48.59)  | 762(62.56)  | 523(63.16)  |
|                                                                             | Fourth                | 6901(12.32)  | 382(88.22)  | 710(50.25)  | 621(50.74)  | 180(79.92)  | 193(38.14)  | 367(44.48)  | 299(46.00)  | 583(61.50)  | 446(66.77)  |
|                                                                             | Fifth & above         | 15407(27.51) | 688(79.72)  | 1245(43.02) | 1161(50.24) | 252(69.61)  | 335(36.81)  | 852(38.69)  | 666(39.53)  | 1456(55.34) | 951(61.39)  |
|                                                                             | p-value               |              | < 0.001     | < 0.001     | 0.383       | < 0.001     | 0.001       | < 0.001     | < 0.001     | < 0.001     | 0.043       |
| Frequency of listening to radio/ watching TV/ reading newspaper or magazine | Not at all            | 14976(27.54) | 288(70.07)  | 1044(39.77) | 2127(47.85) | 178(62.24)  | 298(42.63)  | 308(34.00)  | 394(37.60)  | 1051(53.54) | 1640(63.25) |
|                                                                             | Less than once a week | 10184(18.73) | 646(81.46)  | 671(51.14)  | 829(49.11)  | 355(76.84)  | 481(42.87)  | 442(37.91)  | 836(44.83)  | 724(59.69)  | 352(62.52)  |
|                                                                             | At least once a week  | 29213(53.73) | 1826(90.40) | 4074(57.84) | 1832(53.76) | 1271(82.75) | 1184(45.75) | 2220(49.55) | 1434(54.67) | 3056(63.63) | 473(66.25)  |
|                                                                             | p-value               |              | < 0.001     | < 0.001     | < 0.001     | < 0.001     | 0.147       | < 0.001     | < 0.001     | < 0.001     | 0.264       |

### Univariate analysis magnitude (*ORs and 95% CI*) of sociodemographic characteristics for 4<sup>+</sup>ANC visits

Table 2 presents the results of univariate analysis of 4<sup>+</sup>ANC visits by sociodemographic characteristics across the nine countries in SSA. As shown in Table 2, adequate ANC visits were lower among young women (15-19 years) in seven of the nine countries. The difference was significant in Ghana, Kenya, Malawi, Senegal, and Namibia. The odds of 4<sup>+</sup>ANC visit was lower by 2%-60% among rural residents compared to urban residents across all countries ( $p < 0.001$ ) except in Zambia, in which women from rural places were 26% more likely to attend 4<sup>+</sup>ANCs. The difference was significant in all countries except Rwanda ( $p = 0.283$ ).

Four or more ANC visits had a positive association with increasing educational level. Women and husbands with secondary and higher education had significantly higher odds of 4<sup>+</sup>ANC visits across all the studied countries ( $p < 0.05$ ).



Table 2. Univariate analysis of sociodemographic factors influencing 4+ANC visits in nine sub-Saharan Africa countries.

| Variables                 | Ghana                    | Kenya                  | Malawi                 | Namibia                 | Rwanda                 | Senegal                | Tanzania                | Uganda                 | Zambia                 | Total                  |
|---------------------------|--------------------------|------------------------|------------------------|-------------------------|------------------------|------------------------|-------------------------|------------------------|------------------------|------------------------|
|                           | (3,224)                  | (10,981)               | (9,541)                | (2,286)                 | (4,416)                | (6,552)                | (5,536)                 | (7,979)                | (5,487)                | (56,002)               |
| Age (grouped)             |                          |                        |                        |                         |                        |                        |                         |                        |                        |                        |
| 15-19                     | 1.00[Ref]                | 1.00[Ref]              | 1.00[Ref]              | 1.00[Ref]               | 1.00[Ref]              | 1.00[Ref]              | 1.00[Ref]               | 1.00[Ref]              | 1.00[Ref]              | 1.00[Ref]              |
| 20-24                     | 1.40(0.92,2.13)          | <b>1.32(1.13,1.54)</b> | <b>1.21(1.05,1.39)</b> | <b>1.79(1.28,2.50)</b>  | 1.26(0.88,1.79)        | <b>1.34(1.10,1.62)</b> | 1.10(0.90,1.34)         | 1.15(0.98,1.36)        | 1.17(0.97,1.41)        | <b>1.21(1.13,1.29)</b> |
| 25-29                     | <b>1.89(1.24,2.87)</b>   | <b>1.37(1.18,1.60)</b> | <b>1.38(1.19,1.60)</b> | <b>2.21(1.56,3.13)</b>  | 1.36(0.96,1.93)        | <b>1.31(1.08,1.59)</b> | 1.16(0.95,1.42)         | 1.18(0.99,1.39)        | 1.07(0.89,1.30)        | <b>1.27(1.19,1.36)</b> |
| 30-34                     | <b>1.70(1.12,2.58)</b>   | <b>1.26(1.07,1.48)</b> | <b>1.43(1.22,1.66)</b> | <b>2.34(1.61,3.40)</b>  | 1.15(0.81,1.64)        | <b>1.28(1.05,1.57)</b> | 1.07(0.87,1.32)         | 1.11(0.94,1.33)        | 1.16(0.95,1.42)        | <b>1.23(1.15,1.32)</b> |
| 35 and above              | <b>1.52(1.01,2.29)</b>   | 1.10(0.93,1.29)        | <b>1.39(1.19,1.62)</b> | <b>1.90(1.33,2.71)</b>  | 1.03(0.72,1.46)        | 1.14(0.94,1.39)        | 0.87(0.71,1.07)         | <b>0.83(0.70,0.99)</b> | 1.04(0.85,1.26)        | <b>1.10(1.02,1.17)</b> |
| Place of residence        |                          |                        |                        |                         |                        |                        |                         |                        |                        |                        |
| Urban                     | 1.00[Ref]                | 1.00[Ref]              | 1.00[Ref]              | 1.00[Ref]               | 1.00[Ref]              | 1.00[Ref]              | 1.00[Ref]               | 1.00[Ref]              | 1.00[Ref]              | 1.00[Ref]              |
| Rural                     | <b>0.40(0.32,0.50)</b>   | <b>0.60(0.55,0.65)</b> | <b>0.69(0.62,0.77)</b> | <b>0.66(0.54,0.81)</b>  | 0.98(0.85,1.13)        | <b>0.43(0.38,0.47)</b> | <b>0.52(0.45,0.58)</b>  | <b>0.68(0.60,0.76)</b> | <b>1.26(1.12,1.42)</b> | <b>0.61(0.59,0.63)</b> |
| Women's education         |                          |                        |                        |                         |                        |                        |                         |                        |                        |                        |
| No schooling              | 1.00[Ref]                | 1.00[Ref]              | 1.00[Ref]              | 1.00[Ref]               | 1.00[Ref]              | 1.00[Ref]              | 1.00[Ref]               | 1.00[Ref]              | 1.00[Ref]              | 1.00[Ref]              |
| Primary                   | 1.23(0.96,1.58)          | <b>1.49(1.35,1.65)</b> | <b>1.15(1.01,1.30)</b> | <b>1.77(1.24,2.51)</b>  | <b>1.33(1.11,1.59)</b> | <b>1.70(1.50,1.93)</b> | <b>1.40(1.22,1.62)</b>  | 1.13(0.99,1.30)        | <b>1.22(1.01,1.47)</b> | <b>1.30(1.25,1.36)</b> |
| Secondary                 | <b>2.61(2.06,3.30)</b>   | <b>2.23(1.98,2.51)</b> | <b>1.38(1.18,1.60)</b> | <b>3.41(2.46,4.72)</b>  | <b>1.40(1.11,1.77)</b> | <b>2.13(1.76,2.58)</b> | <b>2.36(1.99,2.80)</b>  | <b>1.61(1.37,1.90)</b> | 1.18(0.97,1.43)        | <b>2.21(2.10,2.33)</b> |
| Higher                    | <b>3.51(2.86, 4.17)</b>  | <b>5.91(4.85,7.20)</b> | <b>3.72(2.58,5.37)</b> | <b>14.43(5.6,37.14)</b> | <b>4.91(3.11,7.78)</b> | <b>7.11(2.43,20.8)</b> | <b>8.54(3.98,18.35)</b> | <b>2.65(2.06,3.40)</b> | <b>3.38(2.28,5.01)</b> | <b>4.97(4.42,5.58)</b> |
| Husband's education       |                          |                        |                        |                         |                        |                        |                         |                        |                        |                        |
| No schooling              | 1.00[Ref]                | 1.00[Ref]              | 1.00[Ref]              | 1.00[Ref]               | 1.00[Ref]              | 1.00[Ref]              | 1.00[Ref]               | 1.00[Ref]              | 1.00[Ref]              | 1.00[Ref]              |
| Primary                   | <b>1.35(0.97,1.87)</b>   | <b>1.57(1.34,1.84)</b> | 1.03(0.88,1.20)        | <b>1.46(0.96,2.22)</b>  | <b>1.23(1.03,1.47)</b> | <b>1.82(1.54,2.15)</b> | <b>1.47(1.23,1.76)</b>  | 0.95(0.80,1.14)        | 1.11(0.84,1.45)        | <b>1.25(1.19,1.31)</b> |
| Secondary                 | <b>2.05(1.63,2.58)</b>   | <b>2.27(1.90,2.71)</b> | <b>1.21(1.03,1.43)</b> | <b>2.38(1.66,3.43)</b>  | 1.17(0.90,1.51)        | <b>2.38(1.95,2.91)</b> | <b>2.59(2.10,3.20)</b>  | <b>1.33(1.09,1.62)</b> | 1.09(0.84,1.43)        | <b>2.06(1.95,2.18)</b> |
| Higher                    | <b>7.03(3.66,13.49)</b>  | <b>4.19(3.27,5.37)</b> | <b>2.25(1.73,2.92)</b> | 14.40(4.38,47.36)       | <b>2.49(1.72,3.60)</b> | <b>3.12(2.12,4.58)</b> | <b>3.98(2.57,6.18)</b>  | <b>1.96(1.55,2.50)</b> | <b>2.26(1.58,3.24)</b> | <b>3.52(3.19,3.88)</b> |
| Women's occupation        |                          |                        |                        |                         |                        |                        |                         |                        |                        |                        |
| Not working O/H           | 1.00[Ref]                | 1.00[Ref]              | 1.00[Ref]              | 1.00[Ref]               | 1.00[Ref]              | 1.00[Ref]              | 1.00[Ref]               | 1.00[Ref]              | 1.00[Ref]              | 1.00[Ref]              |
| Professional/Skilled work | <b>2.27(1.73,2.97)</b>   | <b>2.33(1.86,2.91)</b> | <b>1.35(1.17,1.56)</b> | <b>1.88(1.47,2.40)</b>  | <b>1.45(1.11,1.89)</b> | <b>1.33(1.17,1.51)</b> | <b>1.72(1.35,2.19)</b>  | <b>1.42(1.23,1.63)</b> | <b>1.29(1.10,1.51)</b> | <b>1.73(1.64,1.82)</b> |
| Agriculture Unskilled     | 0.80(0.62,1.03)          | 0.95(0.83,1.09)        | 1.05(0.95,1.15)        | 2.26(0.95,5.39)         | 1.20(0.95,1.51)        | <b>0.62(0.54,0.71)</b> | <b>0.63(0.55,0.73)</b>  | <b>1.06(0.93,1.20)</b> | <b>1.24(1.08,1.42)</b> | <b>0.87(0.84,0.91)</b> |
| Husband's occupation      |                          |                        |                        |                         |                        |                        |                         |                        |                        |                        |
| Not working O/H           | 1.00[Ref]                | 1.00[Ref]              | 1.00[Ref]              | 1.00[Ref]               | 1.00[Ref]              | 1.00[Ref]              | 1.00[Ref]               | 1.00[Ref]              | 1.00[Ref]              | 1.00[Ref]              |
| Professional/Skilled work | 1.00[Ref]                | 1.54(0.99,2.39)        | <b>1.18(1.00,1.39)</b> | 0.65(0.08,5.28)         | 0.82(0.37,1.84)        | 1.06(0.78,1.46)        | <b>2.21(1.17,4.16)</b>  | <b>1.32(1.00,1.74)</b> | 1.16(0.92,1.45)        | <b>1.35(1.22,1.49)</b> |
| Agriculture Unskilled     | <b>0.30(0.23,0.39)</b>   | 0.76(0.49,1.18)        | 0.98(0.84,1.15)        | 0.27(0.03,2.18)         | 0.86(0.38,1.92)        | <b>0.52(0.38,0.72)</b> | <b>1.16(0.62,2.17)</b>  | 0.86(0.65,1.14)        | 1.21(0.97,1.51)        | <b>0.86(0.78,0.95)</b> |
| Wealth quintile           |                          |                        |                        |                         |                        |                        |                         |                        |                        |                        |
| Poorest                   | 1.00[Ref]                | 1.00[Ref]              | 1.00[Ref]              | 1.00[Ref]               | 1.00[Ref]              | 1.00[Ref]              | 1.00[Ref]               | 1.00[Ref]              | 1.00[Ref]              | 1.00[Ref]              |
| Poorer                    | 1.22(0.96,1.56)          | <b>1.37(1.23,1.52)</b> | 1.11(0.98,1.25)        | 1.03(0.77,1.37)         | 1.15(0.96,1.37)        | <b>1.50(1.31,1.72)</b> | 1.13(0.95,1.33)         | <b>1.16(1.02,1.32)</b> | 1.04(0.89,1.22)        | <b>1.19(1.14,1.25)</b> |
| Middle                    | <b>1.67(1.26,2.20)</b>   | <b>1.70(1.52,1.90)</b> | 1.07(0.95,1.21)        | <b>1.40(1.04,1.88)</b>  | <b>1.22(1.01,1.47)</b> | <b>2.10(1.82,2.42)</b> | <b>1.35(1.14,1.59)</b>  | <b>1.25(1.09,1.43)</b> | 0.90(0.76,1.05)        | <b>1.34(1.27,1.41)</b> |
| Richer                    | <b>4.40(2.94,6.59)</b>   | <b>2.12(1.89,2.39)</b> | <b>1.19(1.05,1.35)</b> | <b>1.70(1.25,2.31)</b>  | 1.18(0.98,1.43)        | <b>3.48(2.96,4.10)</b> | <b>2.07(1.76,2.44)</b>  | <b>1.48(1.29,1.71)</b> | <b>0.72(0.61,0.86)</b> | <b>1.60(1.52,1.69)</b> |
| Richest                   | <b>13.36(6.53,27.33)</b> | <b>3.41(3.00,3.88)</b> | <b>1.65(1.45,1.87)</b> | <b>2.59(1.77,3.80)</b>  | 1.10(0.92,1.32)        | <b>5.93(4.81,7.31)</b> | <b>3.02(2.53,3.60)</b>  | 1.87(1.62,2.16)        | 1.18(0.98,1.42)        | <b>2.13(2.02,2.25)</b> |

|    |                                                                             |                        |                        |                        |                        |                        |                        |                        |                        |                        |                        |
|----|-----------------------------------------------------------------------------|------------------------|------------------------|------------------------|------------------------|------------------------|------------------------|------------------------|------------------------|------------------------|------------------------|
| 1  |                                                                             |                        |                        |                        |                        |                        |                        |                        |                        |                        |                        |
| 2  |                                                                             |                        |                        |                        |                        |                        |                        |                        |                        |                        |                        |
| 3  |                                                                             |                        |                        |                        |                        |                        |                        |                        |                        |                        |                        |
| 4  |                                                                             |                        |                        |                        |                        |                        |                        |                        |                        |                        |                        |
| 5  | Birth order                                                                 |                        |                        |                        |                        |                        |                        |                        |                        |                        |                        |
| 6  | First                                                                       | 1.00[Ref]              |
| 7  | Second                                                                      | 1.18(0.85,1.65)        | 0.91(0.81,1.02)        | <b>0.89(0.79,1.00)</b> | 1.14(0.86,1.50)        | 0.88(0.74,1.03)        | 0.93(0.79,1.08)        | <b>0.82(0.70,0.97)</b> | 1.01(0.87,1.16)        | 0.97(0.82,1.14)        | <b>0.93(0.88,0.98)</b> |
| 8  | Third                                                                       | 0.85(0.62,1.18)        | <b>0.80(0.71,0.91)</b> | 0.97(0.85,1.10)        | <b>1.41(1.01,1.96)</b> | 0.83(0.69,1.00)        | <b>0.75(0.64,0.88)</b> | <b>0.72(0.61,0.86)</b> | 0.95(0.82,1.11)        | 0.89(0.74,1.06)        | <b>0.87(0.82,0.92)</b> |
| 9  | Fourth                                                                      | 1.06(0.74,1.53)        | <b>0.68(0.60,0.78)</b> | 0.98(0.86,1.12)        | 0.86(0.61,1.23)        | <b>0.61(0.50,0.76)</b> | <b>0.73(0.61,0.87)</b> | <b>0.65(0.54,0.79)</b> | 0.91(0.77,1.07)        | 1.04(0.85,1.26)        | <b>0.81(0.76,0.86)</b> |
| 10 | Fifth & above                                                               | <b>0.56(0.42,0.73)</b> | <b>0.51(0.46,0.57)</b> | 0.96(0.86,1.08)        | <b>0.59(0.45,0.79)</b> | <b>0.58(0.49,0.69)</b> | <b>0.58(0.50,0.66)</b> | <b>0.50(0.43,0.58)</b> | <b>0.71(0.62,0.80)</b> | <b>0.82(0.71,0.96)</b> | <b>0.65(0.62,0.68)</b> |
| 11 | Frequency of listening to radio/ watching TV/ reading newspaper or magazine |                        |                        |                        |                        |                        |                        |                        |                        |                        |                        |
| 12 | Not at all                                                                  | 1.00[Ref]              |
| 13 | Less than once a week                                                       | <b>1.88(1.42,2.48)</b> | <b>1.59(1.39,1.81)</b> | 1.05(0.94,1.18)        | <b>2.01(1.46,2.78)</b> | 1.01(0.83,1.22)        | 1.19(0.99,1.42)        | <b>1.35(1.16,1.57)</b> | <b>1.29(1.11,1.49)</b> | 0.97(0.80,1.17)        | <b>1.15(1.09,1.21)</b> |
| 14 | At least once a week                                                        | <b>4.02(3.11,5.20)</b> | <b>2.08(1.90,2.28)</b> | <b>1.27(1.16,1.39)</b> | <b>2.91(2.21,3.83)</b> | 1.14(0.96,1.34)        | <b>1.91(1.64,2.22)</b> | <b>2.00(1.73,2.32)</b> | <b>1.52(1.37,1.69)</b> | 1.14(0.96,1.36)        | <b>1.53(1.47,1.59)</b> |

**Bold font indicates a significant difference from reference at p<0.05.** O/H: outside home.

1  
2  
3 Compared to women who did not work outside home, the odds of 4<sup>+</sup>ANC visits  
4  
5 were significantly higher among professional women. Odds of 4<sup>+</sup>ANC visits in  
6  
7 relation to household wealth status showed considerable variation among the  
8  
9 countries ranging from 1.10 (95% CI, 0.92, 1.32) in Rwanda to 13.36 (95% CI, 6.53,  
10  
11 27.33) in Ghana.  
12  
13

14  
15 The pattern of 4<sup>+</sup>ANC utilization showed an inverse relationship with birth order.  
16  
17 Women of fifth and above birth order had significantly lower ANC attendance than  
18  
19 first birth order. Listening to radio/watching TV/ reading newspaper or magazine had  
20  
21 a significant positive association with 4<sup>+</sup>ANC attendance across all countries except  
22  
23 in Rwanda and Zambia (Table 2).  
24  
25

### 26 27 **Multivariable findings**

28  
29  
30 Table 3 summarizes data analysis results adjusted by sociodemographic variables  
31  
32 and adjusted by country.  
33

34  
35 Overall, the likelihood of 4<sup>+</sup>ANC visits were 14% lower among women from  
36  
37 rural areas than from towns (AOR, 0.86; 95% CI: 0.81,0.91). Multivariable logistic  
38  
39 regression analysis exploring the relationship between 4<sup>+</sup>ANC visits and place of  
40  
41 residence was significant in four countries (Kenya, Malawi, Senegal and Zambia).  
42  
43 While in Ghana, Namibia, Rwanda, Tanzania, and Uganda; 4<sup>+</sup>ANC visit had no  
44  
45 association with place of residence. In Zambia, the odds of 4<sup>+</sup>ANC visits was 48%  
46  
47 higher (AOR, 1.48; 95% CI: 1.2, 1.82) among rural women than urban.  
48  
49

50  
51 Findings of selected socio-demographic predictors related to ANC visit after  
52  
53 adjustment for country variations indicated that the odds of 4<sup>+</sup>ANC visits increased  
54  
55 from 14% (AOR=1.14, 95% CI 1.07,1.21, p<0.001) to 96% (AOR=1.96, 95% CI  
56  
57 1.65,2.33, p<0.001) with an increase in women's educational level. Women with  
58  
59 higher educational levels had more than two-fold higher odds of 4<sup>+</sup>ANC visits in  
60

1  
2  
3 seven of the nine countries, and the difference was significant in four (Kenya,  
4 Malawi, Rwanda, and Zambia). Husband's higher educational level had significant  
5 association with 12% (AOR=1.12, 95% CI 1.05, 1.20) to 48% (AOR=1.48, 95% CI  
6 1.31, 1.69) higher odds 4<sup>+</sup>ANC visits of women (p<0.001). Association of husband's  
7 education and 4<sup>+</sup>ANC visits of women was significant only in Kenya, Malawi, and  
8 Zambia.  
9  
10  
11  
12  
13  
14  
15

16  
17 Overall, women's occupation had a positive association with 4<sup>+</sup>ANC visits. The  
18 variation on 4<sup>+</sup>ANC visits was 19% (AOR, 1.19, 95% CI; 1.11, 1.27), 7% (AOR,  
19 1.07, 95% CI; 1.01, 1.13), and 13% (AOR, 1.13, 95% CI; 1.05, 1.21) greater among  
20 working Professional/Skilled women, Agriculture, and Unskilled labour respectively  
21 compared to women not working outside home. In Ghana, the odds of 4<sup>+</sup>ANC visits  
22 was more than fifteen times (AOR, 15.54, 95%CI; 2.1, 114.9) higher among  
23 employed women than women who had no work outside the home. Women in  
24 Uganda, were 62% more to attend 4<sup>+</sup>ANC (AOR, 1.62, 95%CI; 1.28, 2.05).  
25 Agriculture employed women in Kenya, Senegal, and Tanzania and unskilled workers  
26 in Rwanda, Tanzania, and Zambia had non-significant lower uptake of 4<sup>+</sup>ANCs.  
27  
28  
29  
30  
31  
32  
33  
34  
35  
36  
37  
38  
39

40 Women in the wealthiest group were highly likely to undertake 4<sup>+</sup>ANC visits.  
41 After adjusting for country, ANC service utilization increased by 12 % (AOR=1.12,  
42 95% CI 1.06, 1.19), 18% (AOR=1.18, 95% CI 1.11, 1.26), 32% (AOR=1.32, 95% CI  
43 1.23, 1.42), and 41% (AOR=1.41, 95% CI 1.29, 1.55) for every 20% variation on the  
44 wealth category compared to the poorest level (p<0.001) (Table 3). This association  
45 was uniform across the studied countries except in Rwanda where women in the  
46 highest wealth quantile were 23% lower (AOR=0.77, 95% CI 0.57, 1.02) to make  
47 4<sup>+</sup>ANC than the poorest group. The odds of 4<sup>+</sup>ANC visits were 4% (AOR=0.96, 95%  
48  
49  
50  
51  
52  
53  
54  
55  
56  
57  
58  
59  
60

1  
2  
3 CI; 0.78-1.19 and 14% (AOR=0.86, 95% CI; 0.64-1.16) lower among middle and  
4  
5 richer economic status in Zambia.  
6  
7

8 Women with previous birth experience had a significantly lower uptake of ANC  
9  
10 services than first birth order ( $p<0.001$ ). Odds of 4<sup>+</sup>ANC were lower by 16%  
11  
12 (AOR=0.84, 95% CI 0.79, 0.90), 21% (AOR=0.79, 95% CI 0.74, 0.85), 23%  
13  
14 (AOR=0.77, 95% CI 0.72, 0.83), and 32% (AOR=0.68, 95% CI 0.64, 0.73) for  
15  
16 second, third, fourth, and fifth and above birth orders than first birth women (Table 3).  
17  
18 Birth order difference on 4<sup>+</sup>ANC visits were significant in Kenya, Rwanda, Senegal,  
19  
20 Tanzania, Uganda, and Zambia.  
21  
22

23 Women who had access to media at least once a week had 22% higher odds of  
24  
25 4<sup>+</sup>ANC visit than women who had no access (AOR, 1.22, 95%CI; 1.15,1.29). This  
26  
27 association was significant in all countries except in Malawi, Rwanda, Senegal, and  
28  
29 Zambia.  
30  
31  
32  
33  
34  
35  
36  
37  
38  
39  
40  
41  
42  
43  
44  
45  
46  
47  
48  
49  
50  
51  
52  
53  
54  
55  
56  
57  
58  
59  
60

Table 3. Adjusted multivariable analysis of sociodemographic factors influencing 4+ANC visits in nine sub-Saharan countries.

| Variables                                                   | Ghana                   | Kenya                  | Malawi                 | Namibia                | Rwanda                 | Senegal                | Tanzania               | Uganda                 | Zambia                 | Overall *              |
|-------------------------------------------------------------|-------------------------|------------------------|------------------------|------------------------|------------------------|------------------------|------------------------|------------------------|------------------------|------------------------|
| Place of residence                                          |                         |                        |                        |                        |                        |                        |                        |                        |                        |                        |
| Urban                                                       | 1.00[Ref]               | 1.00[Ref]              | 1.00[Ref]              | 1.00[Ref]              | 1.00[Ref]              | 1.00[Ref]              | 1.00[Ref]              | 1.00[Ref]              | 1.00[Ref]              | 1.00[Ref]              |
| Rural                                                       | 0.84(0.61,1.15)         | <b>0.83(0.72,0.9)</b>  | <b>0.83(0.71,0.96)</b> | 0.83(0.57,1.21)        | 0.95(0.77,1.18)        | <b>0.73(0.62,0.84)</b> | 0.83(0.69,1.01)        | 0.86(0.72,1.01)        | <b>1.48(1.2,1.82)</b>  | <b>0.86(0.81,0.91)</b> |
| Women's education                                           |                         |                        |                        |                        |                        |                        |                        |                        |                        |                        |
| No schooling                                                | 1.00[Ref]               | 1.00[Ref]              | 1.00[Ref]              | 1.00[Ref]              | 1.00[Ref]              | 1.00[Ref]              | 1.00[Ref]              | 1.00[Ref]              | 1.00[Ref]              | 1.00[Ref]              |
| Primary                                                     | 1.06(0.78,1.43)         | 1.12(0.90,1.39)        | 1.09(0.94,1.27)        | 1.34(0.83,2.16)        | 1.20(0.99,1.46)        | 1.06(0.91,1.23)        | 1.04(0.88,1.22)        | 1.03(0.87,1.22)        | 1.12(0.90,1.41)        | <b>1.14(1.07,1.21)</b> |
| Secondary                                                   | <b>1.47(1.05,2.05)</b>  | 1.23(0.94,1.60)        | 1.11(0.91,1.35)        | <b>1.78(1.04,3.05)</b> | 1.28(0.95,1.74)        | 1.08(0.84,1.4)         | 1.00(0.79,1.28)        | 1.19(0.96,1.47)        | 1.05(0.81,1.38)        | <b>1.17(1.08,1.21)</b> |
| Higher                                                      | 4.82(0.6,37.23)         | <b>2.17(1.42,3.32)</b> | <b>2.26(1.42,3.60)</b> | 2.13(0.51,8.93)        | <b>3.82(2.17,6.73)</b> | 1.78(0.58,5.47)        | 2.19(0.91,5.30)        | 1.30(0.92,1.83)        | <b>2.06(1.20,355)</b>  | <b>1.96(1.65,2.33)</b> |
| Husband's education                                         |                         |                        |                        |                        |                        |                        |                        |                        |                        |                        |
| No schooling                                                | 1.00[Ref]               | 1.00[Ref]              | 1.00[Ref]              | 1.00[Ref]              | 1.00[Ref]              | 1.00[Ref]              | 1.00[Ref]              | 1.00[Ref]              | 1.00[Ref]              | 1.00[Ref]              |
| Primary                                                     | 1.04(0.73,1.43)         | 1.08(0.87,1.36)        | 0.97(0.83,1.15)        | 1.11(0.71,1.75)        | 1.10(0.91,1.33)        | <b>1.35(1.13,1.61)</b> | 1.18(0.98,1.42)        | 0.86(0.70,1.05)        | 1.07(0.81,1.42)        | <b>1.12(1.05,1.20)</b> |
| Secondary                                                   | 0.97(0.72,1.33)         | 1.20(0.93,1.56)        | 1.06(0.88,1.27)        | 1.21(0.77,1.88)        | 0.93(0.69,1.24)        | <b>1.36(1.09,1.71)</b> | <b>1.35(1.05,1.72)</b> | 1.01(0.80,1.26)        | 1.15(0.86,1.54)        | <b>1.17(1.09,1.27)</b> |
| Higher                                                      | 1.42(0.69,2.93)         | <b>1.41(1.00,1.97)</b> | <b>1.42(1.03,1.95)</b> | 3.57(0.9,14.17)        | 1.42(0.88,2.27)        | 1.32(0.86,2.02)        | 1.38(0.84,2.27)        | 1.22(0.91,1.63)        | <b>1.91(1.23,2.96)</b> | <b>1.48(1.31,1.69)</b> |
| Mother's occupation                                         |                         |                        |                        |                        |                        |                        |                        |                        |                        |                        |
| Not working O/H                                             | 1.00[Ref]               | 1.00[Ref]              | 1.00[Ref]              | 1.00[Ref]              | 1.00[Ref]              | 1.00[Ref]              | 1.00[Ref]              | 1.00[Ref]              | 1.00[Ref]              | 1.00[Ref]              |
| Professional/Skilled work                                   | <b>1.99(1.46,2.27)</b>  | 1.19(0.91,1.56)        | 0.97(0.81,1.15)        | <b>1.64(1.11,2.44)</b> | 1.23(0.91,1.66)        | 1.09(0.94,1.26)        | 1.24(0.93,1.65)        | <b>1.38(1.18,1.62)</b> | <b>1.24(1.01,1.50)</b> | <b>1.19(1.11,1.27)</b> |
| Agriculture                                                 | <b>1.44(1.06,1.97)</b>  | 0.98(0.83,1.15)        | 1.08(0.96,1.19)        | 2.25(0.75,6.72)        | 1.16(0.87,1.53)        | 0.89(0.76,1.04)        | 0.89(0.75,1.07)        | <b>1.26(1.09,1.46)</b> | 1.14(0.96,1.35)        | <b>1.07(1.01,1.13)</b> |
| Unskilled                                                   | <b>15.54(2.1,114.9)</b> | 1.06(0.91,1.24)        | 1.07(0.92,1.22)        | 1.58(0.85,2.97)        | 0.79(0.52,1.21)        | 1.09(0.87,1.35)        | 0.95(0.78,1.16)        | <b>1.62(1.28,2.05)</b> | 0.96(0.76,1.23)        | <b>1.13(1.05,1.21)</b> |
| Wealth quintile                                             |                         |                        |                        |                        |                        |                        |                        |                        |                        |                        |
| Poorest                                                     | 1.00[Ref]               | 1.00[Ref]              | 1.00[Ref]              | 1.00[Ref]              | 1.00[Ref]              | 1.00[Ref]              | 1.00[Ref]              | 1.00[Ref]              | 1.00[Ref]              | 1.00[Ref]              |
| Poorer                                                      | 0.93(0.70,1.23)         | 1.09(0.91,1.32)        | 1.07(0.94,1.23)        | 0.74(0.48,1.13)        | 1.06(0.87,1.28)        | <b>1.37(1.19,1.58)</b> | 1.05(0.87,1.26)        | <b>1.18(1.02,1.37)</b> | 1.09(0.91,1.32)        | <b>1.12(1.06,1.19)</b> |
| Middle                                                      | 0.93(0.64,1.36)         | 1.18(0.96,1.45)        | 1.09(0.94,1.26)        | 0.85(0.53,1.36)        | 1.12(0.91,1.37)        | <b>1.56(1.32,1.86)</b> | 1.15(0.95,1.40)        | <b>1.19(1.01,1.40)</b> | 0.96(0.78,1.19)        | <b>1.18(1.11,1.26)</b> |
| Richer                                                      | <b>1.88(1.09,3.23)</b>  | 1.21(0.97,1.51)        | 1.07(0.92,1.25)        | 0.79(0.45,1.40)        | 1.04(0.84,1.30)        | <b>2.26(1.83,2.79)</b> | <b>1.62(1.31,2.00)</b> | <b>1.29(1.08,1.5)</b>  | 0.86(0.64,1.16)        | <b>1.32(1.23,1.42)</b> |
| Richest                                                     | <b>4.74(1.9,11.95)</b>  | <b>1.55(1.19,2.04)</b> | <b>1.23(1.02,1.50)</b> | 1.31(0.57,3.00)        | 0.77(0.57,1.02)        | <b>3.62(2.78,4.72)</b> | <b>1.69(1.27,2.24)</b> | <b>1.27(1.02,1.60)</b> | 1.17(0.81,1.69)        | <b>1.41(1.29,1.55)</b> |
| Birth order                                                 |                         |                        |                        |                        |                        |                        |                        |                        |                        |                        |
| First                                                       | 1.00[Ref]               | 1.00[Ref]              | 1.00[Ref]              | 1.00[Ref]              | 1.00[Ref]              | 1.00[Ref]              | 1.00[Ref]              | 1.00[Ref]              | 1.00[Ref]              | 1.00[Ref]              |
| Second                                                      | 1.08(0.72,1.63)         | <b>0.71(0.58,0.87)</b> | <b>0.83(0.72,0.95)</b> | 1.22(0.74,1.99)        | <b>0.72(0.60,0.87)</b> | 0.88(0.74,1.06)        | <b>0.82(0.68,1.00)</b> | 0.95(0.80,1.13)        | 0.87(0.70,1.08)        | <b>0.84(0.79,0.90)</b> |
| Third                                                       | 0.77(0.52,1.15)         | <b>0.62(0.51,0.76)</b> | 0.91(0.79,1.05)        | 1.06(0.64,1.76)        | <b>0.68(0.55,0.83)</b> | <b>0.78(0.65,0.94)</b> | <b>0.72(0.59,0.89)</b> | 0.97(0.81,1.16)        | <b>0.76(0.61,0.96)</b> | <b>0.79(0.74,0.85)</b> |
| Fourth                                                      | 1.06(0.69,1.64)         | <b>0.56(0.45,0.70)</b> | 0.95(0.82,1.11)        | 1.12(0.65,1.94)        | 0.52(0.42,0.66)        | <b>0.76(0.62,0.92)</b> | <b>0.71(0.57,0.88)</b> | 0.88(0.73,1.07)        | 0.91(0.71,1.17)        | <b>0.77(0.72,0.83)</b> |
| Fifth & above                                               | 0.75(0.52,1.08)         | <b>0.50(0.41,0.61)</b> | 0.98(0.85,1.12)        | 0.79(0.49,1.26)        | <b>0.50(0.41,0.61)</b> | <b>0.68(0.58,0.80)</b> | <b>0.61(0.51,0.73)</b> | <b>0.77(0.65,0.90)</b> | <b>0.73(0.59,0.90)</b> | <b>0.68(0.64,0.73)</b> |
| Frequency of listening to radio/reading newspaper/magazines |                         |                        |                        |                        |                        |                        |                        |                        |                        |                        |
| Not at all                                                  | 1.00[Ref]               | 1.00[Ref]              | 1.00[Ref]              | 1.00[Ref]              | 1.00[Ref]              | 1.00[Ref]              | 1.00[Ref]              | 1.00[Ref]              | 1.00[Ref]              | 1.00[Ref]              |
| Less than once a week                                       | <b>1.47(1.08, 2.00)</b> | <b>1.35(1.08,1.68)</b> | 1.05(0.94,1.20)        | <b>1.94(1.22,3.07)</b> | 0.95(0.78,1.17)        | 1.06(0.87,1.29)        | 1.11(0.93,1.33)        | 1.13(0.96,1.34)        | 1.01(0.80,1.28)        | <b>1.08(1.01,1.15)</b> |
| At least once a week                                        | <b>2.62(1.96,3.50)</b>  | <b>1.21(1.02,1.44)</b> | 1.09(0.98,1.22)        | <b>2.31(1.51,3.53)</b> | 1.07(0.88,1.30)        | 1.14(0.96,1.35)        | <b>1.34(1.12,1.60)</b> | <b>1.24(1.09,1.41)</b> | 1.05(0.85,1.30)        | <b>1.22(1.15,1.29)</b> |

All are adjusted for sociodemographic factors and media exposure. \* adjusted for sociodemographic factors, media exposure, and country. **bold font** indicates a significant difference from reference at  $p < 0.05$ , O/H: outside home

## Discussion

Every pregnant woman should receive quality care throughout her pregnancy. However, in the nine sub-Saharan Africa countries examined in this study only 55.52% (95% CI; 55.11, 55.93) attended 4<sup>+</sup>ANC. There were disparities between the countries in the proportion of women attending 4<sup>+</sup>ANC, with the highest in Ghana (85.61%) followed by Namibia (78.92%), and Zambia (64.2%), and the lowest proportion from Rwanda (44.5%), Senegal (45.3%), and Tanzania (48.1%).

Demographic and socioeconomic factors, including place of residence, women and husbands educational level, women and husbands occupational status, household wealth quantiles, birth order, and access to media were significant determinants of 4<sup>+</sup>ANC attendance. Therefore, there is an urgent need on interventions directed towards maximizing the utilization of ANC in the SSA.

The strength of this analysis is that we used nationally-representative data, from nine sub-Saharan Africa countries, assumed to have minimum sampling (random or systemic) or instrumental errors through the use of appropriate multistage stratified cluster sampling strategies, having a large sample size of 56,002 respondents, and weighted data analysis with reliable test of instrumentations. The analytical approach as pooled data support the outcome to be valid and the merit in segregating data allowed a focus on aspects of ANC visits that may remain hidden in intra-national/national level indicators. Recall biases of self-reported data and the cross-sectional nature of the studies limits the cause-effect association of potential predictors. Since the data were obtained from countries DHS at different times, awareness of participants may differ. Moreover, the data in the present analysis did not consider the quality of care provided to pregnant women during ANC visits which could be a potential predictor for ANC attendance.

1  
2  
3  
4  
5  
6 Pooled data, adjusted by country, showed that a rural place of residence, no  
7 schooling, of either the wife or husband, no maternal employment, low household  
8 economic status, second and higher birth order, and lack of access to media were  
9 significantly associated with lower utilization of 4<sup>+</sup>ANC (Table 3). This is in line with  
10 previous studies from low and middle income countries <sup>6 11 15 18 21 23</sup>.

11  
12  
13  
14  
15  
16  
17 Country-level data showed that Ghana and Namibia had the highest attendance of  
18 4<sup>+</sup>ANC visits across all reproductive age groups. The finding from Ghana was in line  
19 with the 2013 cross-sectional study where 86% of Ghanaian women reported  
20 attending 4<sup>+</sup>ANC visits <sup>21</sup>. Consistent with the finding from other studies, in India and  
21  
22  
23  
24  
25  
26  
27  
28  
29  
30  
31  
32  
33  
34  
35  
36  
37  
38  
39  
40  
41  
42  
43  
44  
45  
46  
47  
48  
49  
50  
51  
52  
53  
54  
55  
56  
57  
58  
59  
60  
Nigeria, this report also showed that 4<sup>+</sup>ANC visits was very low in Rwanda, Senegal,  
Tanzania, Malawi, and Kenya <sup>23 24</sup>.

Women from rural areas had 5%-27% lower odds of 4<sup>+</sup>ANC visits in eight of the  
nine studied countries, and was significant in Kenya, Malawi, and Senegal. However,  
contrary to other studies there was a 48% greater uptake of 4<sup>+</sup>ANCs by rural residents  
from Zambia (Table 3)<sup>22-24</sup>.

Multivariable analysis indicated that higher education among both women and  
men was a significant predictor of 4<sup>+</sup>ANC visits <sup>6 8 11 18 23</sup>. Women with higher  
educational levels had more than two-fold higher odds of 4<sup>+</sup>ANC visits. This  
difference was significant in Kenya, Malawi, Rwanda, and Zambia. Similarly, having  
a husband with a higher educational level was significantly associated with 4<sup>+</sup>ANC  
visits among women from Kenya, Malawi, and Zambia <sup>32</sup>.

Women's occupation had non-uniform association with 4<sup>+</sup>ANC visits across  
countries. Women from Ghana and Uganda working as Professional/Skilled,  
Agriculture, and Unskilled labour attended more ANC visits than women who did not



1  
2  
3 work outside the home, a finding similar to other studies<sup>18</sup>. However, this association  
4 was not significant in seven of the nine countries (Kenya, Malawi, Namibia, Rwanda,  
5 Senegal, Tanzania, and Zambia)<sup>11</sup>.  
6  
7  
8  
9

10 Both univariate and multivariable analysis indicated that difference in wealth  
11 quantiles was associated with attendance at 4+ANCs<sup>7 8 21 25</sup>. Women from the highest  
12 wealth category had significantly greater access to 4+ANC visits than those in the  
13 lowest category. This was significant in Ghana, Kenya, Malawi, Senegal, Tanzania,  
14 and Uganda. In Rwanda women in the richest wealth quantile had 23% lower  
15 (AOR=0.77, 95% CI 0.57, 1.02) 4+ANC visits than the poorest group, which is  
16 different from the existing literature<sup>11 18 21 23</sup>.  
17  
18  
19  
20  
21  
22  
23  
24  
25

26 Our findings revealed that women in their first pregnancy were more likely to  
27 attend 4+ANC than second pregnancies and above, except in Namibia. This might be  
28 due to them being more careful about pregnancy<sup>33</sup>. This difference was significant in  
29 Kenya, Rwanda, Senegal, Tanzania, Uganda, and Zambia, and was similar to previous  
30 studies<sup>10 18</sup>. Consistent with our findings in Namibia, research from Nigeria suggested  
31 that adolescents are less likely to attend ANC services<sup>29</sup>.  
32  
33  
34  
35  
36  
37  
38  
39

40 Listening to radio/ watching TV/ reading newspapers or magazines at least once a  
41 week was positively associated with the uptake of 4+ANC across all the studied  
42 countries. The odds of 4+ANC visit among women who had access to media at least  
43 once a week was more than two-fold higher in Ghana (AOR=2.62, 95% CI 1.96, 3.50)  
44 and Namibia (AOR=2.31, 95% CI 1.51, 3.53). This association was not significant in  
45 Rwanda, Senegal, Malawi, and Zambia<sup>8 11 18 23</sup>.  
46  
47  
48  
49  
50  
51  
52  
53

54 In summary, despite the importance of attending the WHO recommended level of  
55 at least 4+ANC visits for a normal pregnancy<sup>1</sup>, many women in SSA have limited  
56 access. The result of this study indicate that, disparities on 4+ANC visits were related  
57  
58  
59  
60

1  
2  
3 to womens economic situation as well as physical barriers <sup>12 25</sup>. Therefore,  
4  
5 interventions on addressing the inequalities on ANC services use among women from  
6  
7 rural areas and with limited resources are crucial. The relatively high utilization of  
8  
9 ANC in Ghana could be due to community based health insurance <sup>8 21 27</sup>. Furthermore,  
10  
11 governments committed to community insurance are crucial to avoid the challenges  
12  
13 faced in countries like Rwanda, which was functional 1999-2012<sup>34</sup>, but not in  
14  
15 2014/2015.  
16  
17

18  
19 Women and husbands with higher education, exposed to outside home  
20  
21 occupation, and who had exposure to media had positive results on the uptake of  
22  
23 4+ANC. Educated women and their husbands as well as those in employment  
24  
25 presumably knew the importance of adequate ANC attendance.  
26  
27

## 28 **Conclusion and recommendation**

29  
30 Four or more ANC service utilization is low among women of the SSA countries.  
31  
32 Despite its importance countries had varied practices of 4+ANC visits.  
33  
34

35  
36 Therefore, regional and country-specific maternal health program interventions  
37  
38 are required to address the barriers of adequate ANC visits. Moreover, health  
39  
40 programs should target women of rural resident, without schooling, no outside home  
41  
42 occupation, from low-household economic status, non-first-time pregnancy, and had  
43  
44 no access to media.  
45  
46

47 **Author Contributions:** AKA conceptualization, design the study methodology,  
48  
49 conduct the literature review, data acquisition, formal analysis, interpretation of data,  
50  
51 and write (original draft). AKA, LXZ, ZZH, MEM, and QQ write (review and  
52  
53 editing), LXZ visualization and supervision. AKA and LXZ administration. All  
54  
55 authors read and approved the final manuscript  
56  
57  
58  
59  
60

1  
2  
3 **Funding:** The authors have not declared a specific grant for this research from any  
4 funding in the public, commercial or not-for-profit sectors.  
5  
6

7  
8 **Acknowledgments:** The authors are grateful to the Measure DHS, ICF international,  
9 Rockville, Maryland, USA for providing the data for analysis.  
10  
11  
12

13 **Competing interests:** None declared.  
14  
15

16 **Patients consent for publication:** Not required.  
17  
18

19 **Ethics approval:** This study was exempt from review by the ethics committee as  
20 publicly available data sets were used and no identifying participant information was  
21 obtained. The authorization for using the data in the current analysis was granted from  
22 the DHS program: DHS, ICF international, Rockville, Maryland, USA office upon  
23 presenting the research protocol and research plan aims.  
24  
25  
26  
27  
28  
29

30 **Data availability statement:** Data sets used in the analysis are publicly available and  
31 can be accessed online through application to MEASURE DHS. Analysis syntaxes  
32 and outputs generated for the study can be made available upon request to the  
33 corresponding author.  
34  
35  
36  
37  
38  
39

40 Figure captions

41  
42 **Figure 1:** Flow chart of the process of selection of women for analysis of 4<sup>+</sup>ANC  
43 visits  
44  
45  
46

47 **Figure 2.** Proportion of 4<sup>+</sup>ANC visits of women in nine sub-Saharan Africa countries,  
48 three years preceding the DHS survey of each country  
49

50 **Figure 3.** Proportion of 4<sup>+</sup>ANC visits of women in nine sub-Saharan Africa countries  
51 and their socio-demographic factors, with 95% confidence interval  
52  
53  
54  
55  
56  
57

58 **References**  
59  
60

1. WHO Recommendations on Antenatal Care for a Positive Pregnancy Experience. Geneva: World Health Organization, 2016.
2. Trends in maternal mortality 2000 to 2017: estimates by WHO, UNICEF, UNFPA, World Bank Group and the United Nations Population Division. Geneva: World Health Organization; 2019. Licence: CC BY-NC-SA 3.0 IGO.
3. United Nations Inter-agency Group for Child Mortality Estimation (UNIGME) UNCsF. 'Levels & Trends in Child Mortality: Report 2019, Estimates developed by the United Nations Inter-agency Group for Child Mortality Estimation'. New York 2019
4. Hug L, Alexander M, You D, et al. National, regional, and global levels and trends in neonatal mortality between 1990 and 2017, with scenario-based projections to 2030: a systematic analysis. *The Lancet Global health* 2019;7(6):e710-e20. doi: 10.1016/s2214-109x(19)30163-9 [published Online First: 2019/05/18]
5. group TAfMaNHIAms. Population-based rates, timing, and causes of maternal deaths, stillbirths, and neonatal deaths in south Asia and sub-Saharan Africa: a multi-country prospective cohort study. *The Lancet Global health* 2018;6(12):e1297-e308. doi: 10.1016/s2214-109x(18)30385-1 [published Online First: 2018/10/27]
6. WHO. Antenatal Care in Developing Countries Promises, achievements and missed opportunities, An analysis of trends, levels and differentials, 1990-2001. 2003:36.
7. Moller AB, Petzold M, Chou D, et al. Early antenatal care visit: a systematic analysis of regional and global levels and trends of coverage from 1990 to 2013. *The Lancet Global health* 2017;5(10):e977-e83. doi: 10.1016/s2214-109x(17)30325-x [published Online First: 2017/09/16]
8. Tekelab T, Chojenta C, Smith R, et al. Factors affecting utilization of antenatal care in Ethiopia: A systematic review and meta-analysis. *PloS one* 2019;14(4):e0214848. doi: 10.1371/journal.pone.0214848 [published Online First: 2019/04/12]
9. Tekelab T, Chojenta C, Smith R, et al. The impact of antenatal care on neonatal mortality in sub-Saharan Africa: A systematic review and meta-analysis. 2019;14(9):e0222566. doi: 10.1371/journal.pone.0222566
10. Woldegiorgis MA, Hiller J, Mekonnen W, et al. Determinants of antenatal care and skilled birth attendance in sub-Saharan Africa: A multilevel analysis. *Health services research* 2019;54(5):1110-18. doi: 10.1111/1475-6773.13163 [published Online First: 2019/05/16]
11. Tripathi V, Singh R. Regional differences in usage of antenatal care and safe delivery services in Indonesia: findings from a nationally representative survey. *BMJ open* 2017;7(2):e013408. doi: 10.1136/bmjopen-2016-013408 [published Online First: 2017/02/06]
12. Rosário EVN, Gomes MC, Brito M, et al. Determinants of maternal health care and birth outcome in the Dande Health and Demographic Surveillance System area, Angola. *PloS one* 2019;14(8):e0221280. doi: 10.1371/journal.pone.0221280 [published Online First: 2019/08/23]
13. Aziz Ali S, Ahmed Dero A, Aziz Ali S, et al. Factors affecting the utilization of antenatal care among pregnant women: A literature review. *J Preg Neonatal Med* 2018;2(2):41-45.
14. Ribeiro ER, Guimarães AM, Bettiol H, et al. Risk factors for inadequate prenatal care use in the metropolitan area of Aracaju, Northeast Brazil. *BMC pregnancy and childbirth* 2009;9:31. doi: 10.1186/1471-2393-9-31 [published Online First: 2009/07/23]
15. Nimi T, Fraga S, Costa D, et al. Prenatal care and pregnancy outcomes: A cross-sectional study in Luanda, Angola. *International journal of gynaecology and obstetrics: the official organ of the International Federation of Gynaecology and Obstetrics* 2016;135 Suppl 1:S72-s78. doi: 10.1016/j.ijgo.2016.08.013 [published Online First: 2016/11/12]
16. Guliani H, Sepehri A, Serieux J. Determinants of prenatal care use: evidence from 32 low-income countries across Asia, Sub-Saharan Africa and Latin America. *Health policy and planning* 2014;29(5):589-602. doi: 10.1093/heapol/czt045 [published Online First: 2013/07/31]
17. Titaley CR, Dibley MJ, Roberts CL. Factors associated with underutilization of antenatal care services in Indonesia: results of Indonesia Demographic and Health Survey 2002/2003 and 2007. *BMC public health* 2010;10:485. doi: 10.1186/1471-2458-10-485 [published Online First: 2010/08/18]
18. Simkhada B, Teijlingen ER, Porter M, et al. Factors affecting the utilization of antenatal care in developing countries: systematic review of the literature. *Journal of advanced nursing* 2008;61(3):244-60. doi: 10.1111/j.1365-2648.2007.04532.x [published Online First: 2008/01/17]
19. Aliyu AA, Dahiru T. Predictors of delayed Antenatal Care (ANC) visits in Nigeria: secondary analysis of 2013 Nigeria Demographic and Health Survey (NDHS). *The Pan African medical journal* 2017;26:124. doi: 10.11604/pamj.2017.26.124.9861 [published Online First: 2017/05/24]

- 1
  - 2
  - 3
  - 4
  - 5
  - 6
  - 7
  - 8
  - 9
  - 10
  - 11
  - 12
  - 13
  - 14
  - 15
  - 16
  - 17
  - 18
  - 19
  - 20
  - 21
  - 22
  - 23
  - 24
  - 25
  - 26
  - 27
  - 28
  - 29
  - 30
  - 31
  - 32
  - 33
  - 34
  - 35
  - 36
  - 37
  - 38
  - 39
  - 40
  - 41
  - 42
  - 43
  - 44
  - 45
  - 46
  - 47
  - 48
  - 49
  - 50
  - 51
  - 52
  - 53
  - 54
  - 55
  - 56
  - 57
  - 58
  - 59
  - 60
20. Tang X, Ding L, Feng Y, et al. Antenatal care use and its determinants among migrant women during the first delivery: a nation-wide cross-sectional study in China. *BMC pregnancy and childbirth* 2019;19(1):355-55. doi: 10.1186/s12884-019-2520-3
21. Sakeah E, Okawa S, Rexford Oduro A, et al. Determinants of attending antenatal care at least four times in rural Ghana: analysis of a cross-sectional survey. *Global health action* 2017;10(1):1291879. doi: 10.1080/16549716.2017.1291879 [published Online First: 2017/06/06]
22. Mekonnen T, Dune T, Perz J, et al. Trends and Determinants of Antenatal Care Service Use in Ethiopia between 2000 and 2016. *International journal of environmental research and public health* 2019;16(5) doi: 10.3390/ijerph16050748 [published Online First: 2019/03/06]
23. Ogbo FA, Dhama MV, Ude EM, et al. Enablers and Barriers to the Utilization of Antenatal Care Services in India. *International journal of environmental research and public health* 2019;16(17) doi: 10.3390/ijerph16173152 [published Online First: 2019/09/01]
24. El-Khatib Z, Kolawole Odusina E, Ghose B, et al. Patterns and Predictors of Insufficient Antenatal Care Utilization in Nigeria over a Decade: A Pooled Data Analysis Using Demographic and Health Surveys. *International journal of environmental research and public health* 2020;17(21) doi: 10.3390/ijerph17218261 [published Online First: 2020/11/14]
25. Asundep NN, Carson AP, Turpin CA, et al. Determinants of access to antenatal care and birth outcomes in Kumasi, Ghana. *Journal of epidemiology and global health* 2013;3(4):279-88. doi: 10.1016/j.jegh.2013.09.004 [published Online First: 2013/11/12]
26. Woldegiorgis MA, Hiller JE, Mekonnen W, et al. Disparities in maternal health services in sub-Saharan Africa. *International journal of public health* 2018;63(4):525-35. doi: 10.1007/s00038-018-1086-6 [published Online First: 2018/03/25]
27. Alam N, Hajizadeh M, Dumont A, et al. Inequalities in maternal health care utilization in sub-Saharan African countries: a multiyear and multi-country analysis. *PloS one* 2015;10(4):e0120922. doi: 10.1371/journal.pone.0120922 [published Online First: 2015/04/09]
28. United Nations (2015). Transforming our world: The 2030 agenda for sustainable development,(2019)(<https://sustainabledevelopment.un.org/SDG>, accessed 28th November,2020.
29. Owolabi OO, Wong KLM, Dennis ML, et al. Comparing the use and content of antenatal care in adolescent and older first-time mothers in 13 countries of west Africa: a cross-sectional analysis of Demographic and Health Surveys. *The Lancet Child & adolescent health* 2017;1(3):203-12. doi: 10.1016/s2352-4642(17)30025-1 [published Online First: 2018/09/01]
30. Corsi DJ, Neuman M, Finlay JE, et al. Demographic and health surveys: a profile. *International journal of epidemiology* 2012;41(6):1602-13. doi: 10.1093/ije/dys184 [published Online First: 2012/11/14]
31. Filmer D, Pritchett LH. Estimating wealth effects without expenditure data--or tears: an application to educational enrollments in states of India. *Demography* 2001;38(1):115-32. doi: 10.1353/dem.2001.0003 [published Online First: 2001/03/03]
32. Ghose B, Feng D, Tang S, et al. Women's decision-making autonomy and utilisation of maternal healthcare services: results from the Bangladesh Demographic and Health Survey. *BMJ open* 2017;7(9):e017142. doi: 10.1136/bmjopen-2017-017142 [published Online First: 2017/09/09]
33. Shahabuddin A, De Brouwere V, Adhikari R, et al. Determinants of institutional delivery among young married women in Nepal: Evidence from the Nepal Demographic and Health Survey, 2011. *BMJ open* 2017;7(4):e012446. doi: 10.1136/bmjopen-2016-012446 [published Online First: 2017/04/15]
34. Nyandekwe M, Nzayirambaho M, Kakoma JB. Universal health insurance in Rwanda: major challenges and solutions for financial sustainability case study of Rwanda community-based health insurance part I. *The Pan African medical journal* 2020;37:55. doi: 10.11604/pamj.2020.37.55.20376 [published Online First: 2020/11/20]

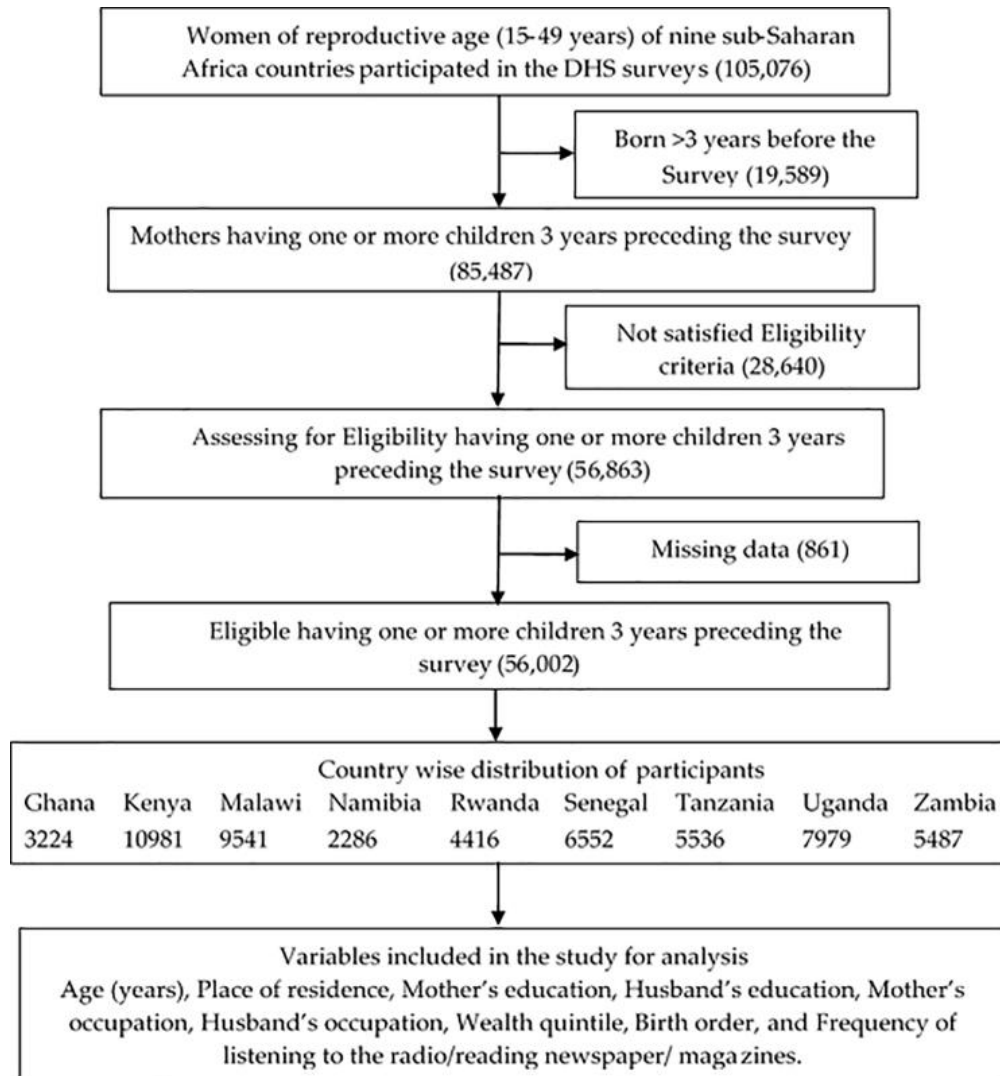

196x211mm (96 x 96 DPI)

1  
2  
3  
4  
5  
6  
7  
8  
9  
10  
11  
12  
13  
14  
15  
16  
17  
18  
19  
20  
21  
22  
23  
24  
25  
26  
27  
28  
29  
30  
31  
32  
33  
34  
35  
36  
37  
38  
39  
40  
41  
42  
43  
44  
45  
46  
47  
48  
49  
50  
51  
52  
53  
54  
55  
56  
57  
58  
59  
60



151x90mm (300 x 300 DPI)

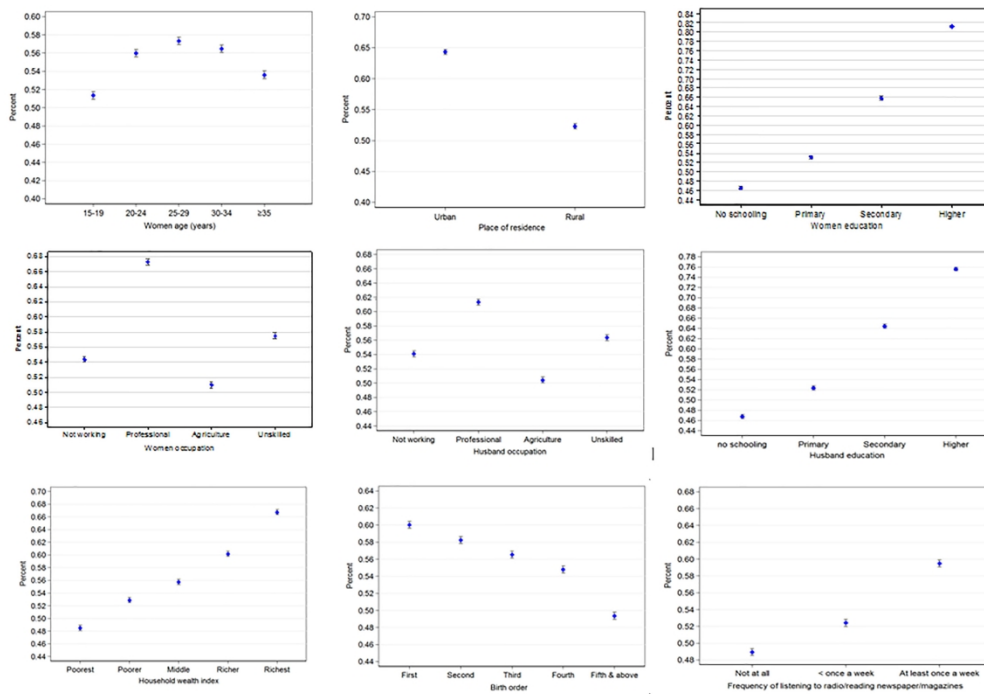

251x174mm (300 x 300 DPI)



**STROBE 2007 (v4) Statement—Checklist of items that should be included in reports of *cross-sectional studies***

| Section/Topic             | Item # | Recommendation                                                                                                                                                                       | Reported on page # |
|---------------------------|--------|--------------------------------------------------------------------------------------------------------------------------------------------------------------------------------------|--------------------|
| Title and abstract        | 1      | (a) Indicate the study’s design with a commonly used term in the title or the abstract                                                                                               | 1                  |
|                           |        | (b) Provide in the abstract an informative and balanced summary of what was done and what was found                                                                                  | 2                  |
| <b>Introduction</b>       |        |                                                                                                                                                                                      |                    |
| Background/rationale      | 2      | Explain the scientific background and rationale for the investigation being reported                                                                                                 | 3-4                |
| Objectives                | 3      | State specific objectives, including any prespecified hypotheses                                                                                                                     | 4                  |
| <b>Methods</b>            |        |                                                                                                                                                                                      |                    |
| Study design              | 4      | Present key elements of study design early in the paper                                                                                                                              | 5                  |
| Setting                   | 5      | Describe the setting, locations, and relevant dates, including periods of recruitment, exposure, follow-up, and data collection                                                      | 5                  |
| Participants              | 6      | (a) Give the eligibility criteria, and the sources and methods of selection of participants                                                                                          | 6                  |
| Variables                 | 7      | Clearly define all outcomes, exposures, predictors, potential confounders, and effect modifiers. Give diagnostic criteria, if applicable                                             | 6                  |
| Data sources/ measurement | 8*     | For each variable of interest, give sources of data and details of methods of assessment (measurement). Describe comparability of assessment methods if there is more than one group | -                  |
| Bias                      | 9      | Describe any efforts to address potential sources of bias                                                                                                                            | 6                  |
| Study size                | 10     | Explain how the study size was arrived at                                                                                                                                            | 5-6                |
| Quantitative variables    | 11     | Explain how quantitative variables were handled in the analyses. If applicable, describe which groupings were chosen and why                                                         | 7                  |
| Statistical methods       | 12     | (a) Describe all statistical methods, including those used to control for confounding                                                                                                | 7-8                |
|                           |        | (b) Describe any methods used to examine subgroups and interactions                                                                                                                  | 7-8                |
|                           |        | (c) Explain how missing data were addressed                                                                                                                                          | 6                  |
|                           |        | (d) If applicable, describe analytical methods taking account of sampling strategy                                                                                                   | 7                  |
|                           |        | (e) Describe any sensitivity analyses                                                                                                                                                | -                  |

|                          |     |                                                                                                                                                                                                              |        |
|--------------------------|-----|--------------------------------------------------------------------------------------------------------------------------------------------------------------------------------------------------------------|--------|
| <b>Results</b>           |     |                                                                                                                                                                                                              |        |
| Participants             | 13* | (a) Report numbers of individuals at each stage of study—eg numbers potentially eligible, examined for eligibility, confirmed eligible, included in the study, completing follow-up, and analysed            | -      |
|                          |     | (b) Give reasons for non-participation at each stage                                                                                                                                                         | -      |
|                          |     | (c) Consider use of a flow diagram                                                                                                                                                                           | 6      |
| Descriptive data         | 14* | (a) Give characteristics of study participants (eg demographic, clinical, social) and information on exposures and potential confounders                                                                     | 8-9    |
|                          |     | (b) Indicate number of participants with missing data for each variable of interest                                                                                                                          | 11-13  |
| Outcome data             | 15* | Report numbers of outcome events or summary measures                                                                                                                                                         | 13     |
| Main results             | 16  | (a) Give unadjusted estimates and, if applicable, confounder-adjusted estimates and their precision (eg, 95% confidence interval). Make clear which confounders were adjusted for and why they were included | 13- 21 |
|                          |     | (b) Report category boundaries when continuous variables were categorized                                                                                                                                    | 11-14  |
|                          |     | (c) If relevant, consider translating estimates of relative risk into absolute risk for a meaningful time period                                                                                             | -      |
| Other analyses           | 17  | Report other analyses done—eg analyses of subgroups and interactions, and sensitivity analyses                                                                                                               | -      |
| <b>Discussion</b>        |     |                                                                                                                                                                                                              |        |
| Key results              | 18  | Summarise key results with reference to study objectives                                                                                                                                                     | 22     |
| Limitations              | 19  | Discuss limitations of the study, taking into account sources of potential bias or imprecision. Discuss both direction and magnitude of any potential bias                                                   | 22-23  |
| Interpretation           | 20  | Give a cautious overall interpretation of results considering objectives, limitations, multiplicity of analyses, results from similar studies, and other relevant evidence                                   | 23-25  |
| Generalisability         | 21  | Discuss the generalisability (external validity) of the study results                                                                                                                                        | 22-23  |
| <b>Other information</b> |     |                                                                                                                                                                                                              |        |
| Funding                  | 22  | Give the source of funding and the role of the funders for the present study and, if applicable, for the original study on which the present article is based                                                | NA     |

\*Give information separately for cases and controls in case-control studies and, if applicable, for exposed and unexposed groups in cohort and cross-sectional studies.

**Note:** An Explanation and Elaboration article discusses each checklist item and gives methodological background and published examples of transparent reporting. The STROBE checklist is best used in conjunction with this article (freely available on the Web sites of PLoS Medicine at <http://www.plosmedicine.org/>, Annals of Internal Medicine at <http://www.annals.org/>, and Epidemiology at <http://www.epidem.com/>). Information on the STROBE Initiative is available at [www.strobe-statement.org](http://www.strobe-statement.org).
